# Supplementary material for: Rational Design of New Monoterpene-Containing Azoles and Their Antifungal Activity
Source: MDPI journal article supplement (doi:10.3390/antibiotics12050818), 2023-04-27
Supplement: s1 [file s1]

## Rational design of new monoterpene-containing azoles and their antifungal activity

Nikolai S. Li-Zhulanov <sup>1,\*</sup>, Nadezhda P. Zaikova <sup>1</sup>, Suat Sari <sup>2</sup>, Dolunay Gülmez <sup>3</sup>, Suna Sabuncuoğlu <sup>4</sup>, Keriman Ozadali-Sari <sup>2</sup>, Sevtap Arikan-Akdagli <sup>3</sup>, Andrey A. Nefedov <sup>1</sup>, Tatyana V. Rybalova <sup>1</sup>, Konstantin P. Volcho <sup>1,\*</sup>, Nariman F. Salakhutdinov <sup>1</sup>

<sup>1</sup> N.N. Vorozhtsov Novosibirsk Institute of Organic Chemistry SB RAS, 9 Akademika Lavrentieva Ave., Novosibirsk, 630090, Russia

<sup>2</sup> Hacettepe University Faculty of Pharmacy, Dept. of Pharmaceutical Chemistry, Sıhhiye Ankara, 06100, Turkey

<sup>3</sup> Hacettepe University Faculty of Medicine, Dept. of Medical Microbiology, Sıhhiye Ankara, 06100, Turkey

<sup>4</sup> Hacettepe University Faculty of Pharmacy, Dept. of Pharmaceutical Toxicology, Sıhhiye Ankara, 06100, Turkey

\* Correspondence: lizhulan@nioch.nsc.ru (N.S.L.-Z.), volcho@nioch.nsc.ru (K.P.V.); Tel.: +7 (383) 330-88-70

1. NMR <sup>1</sup>H and <sup>13</sup>C spectra of the compounds **9b**, **c**, **g**, **d** and **10a-h** (p. 2-25).
2. HRMS of the compounds **10a-g** (p.26-32)
3. Cytotoxicity results (p. 33).
4. Molecular modeling (p. 34).

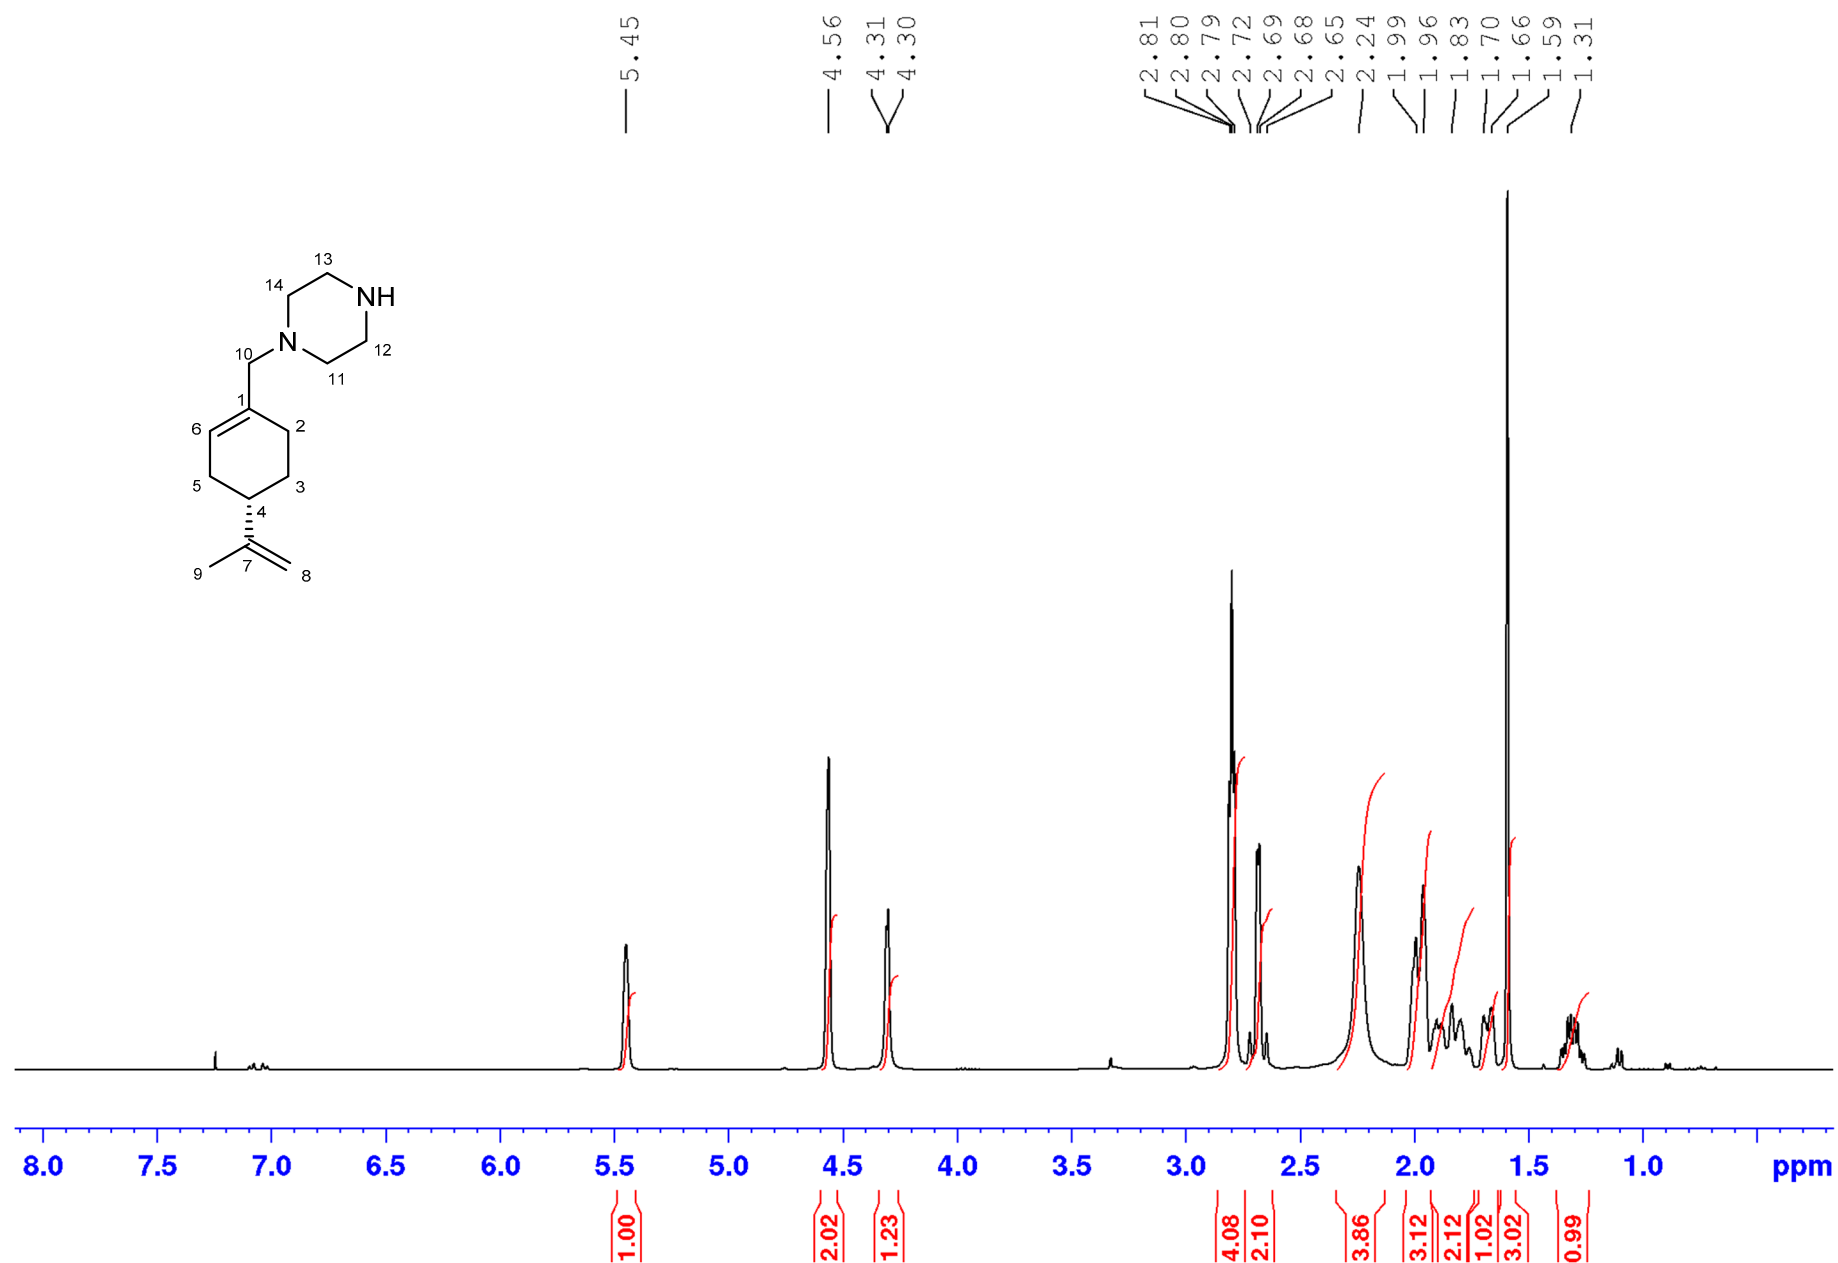

**Figure S1.** <sup>1</sup>H-NMR spectroscopic data for compound **9b**.

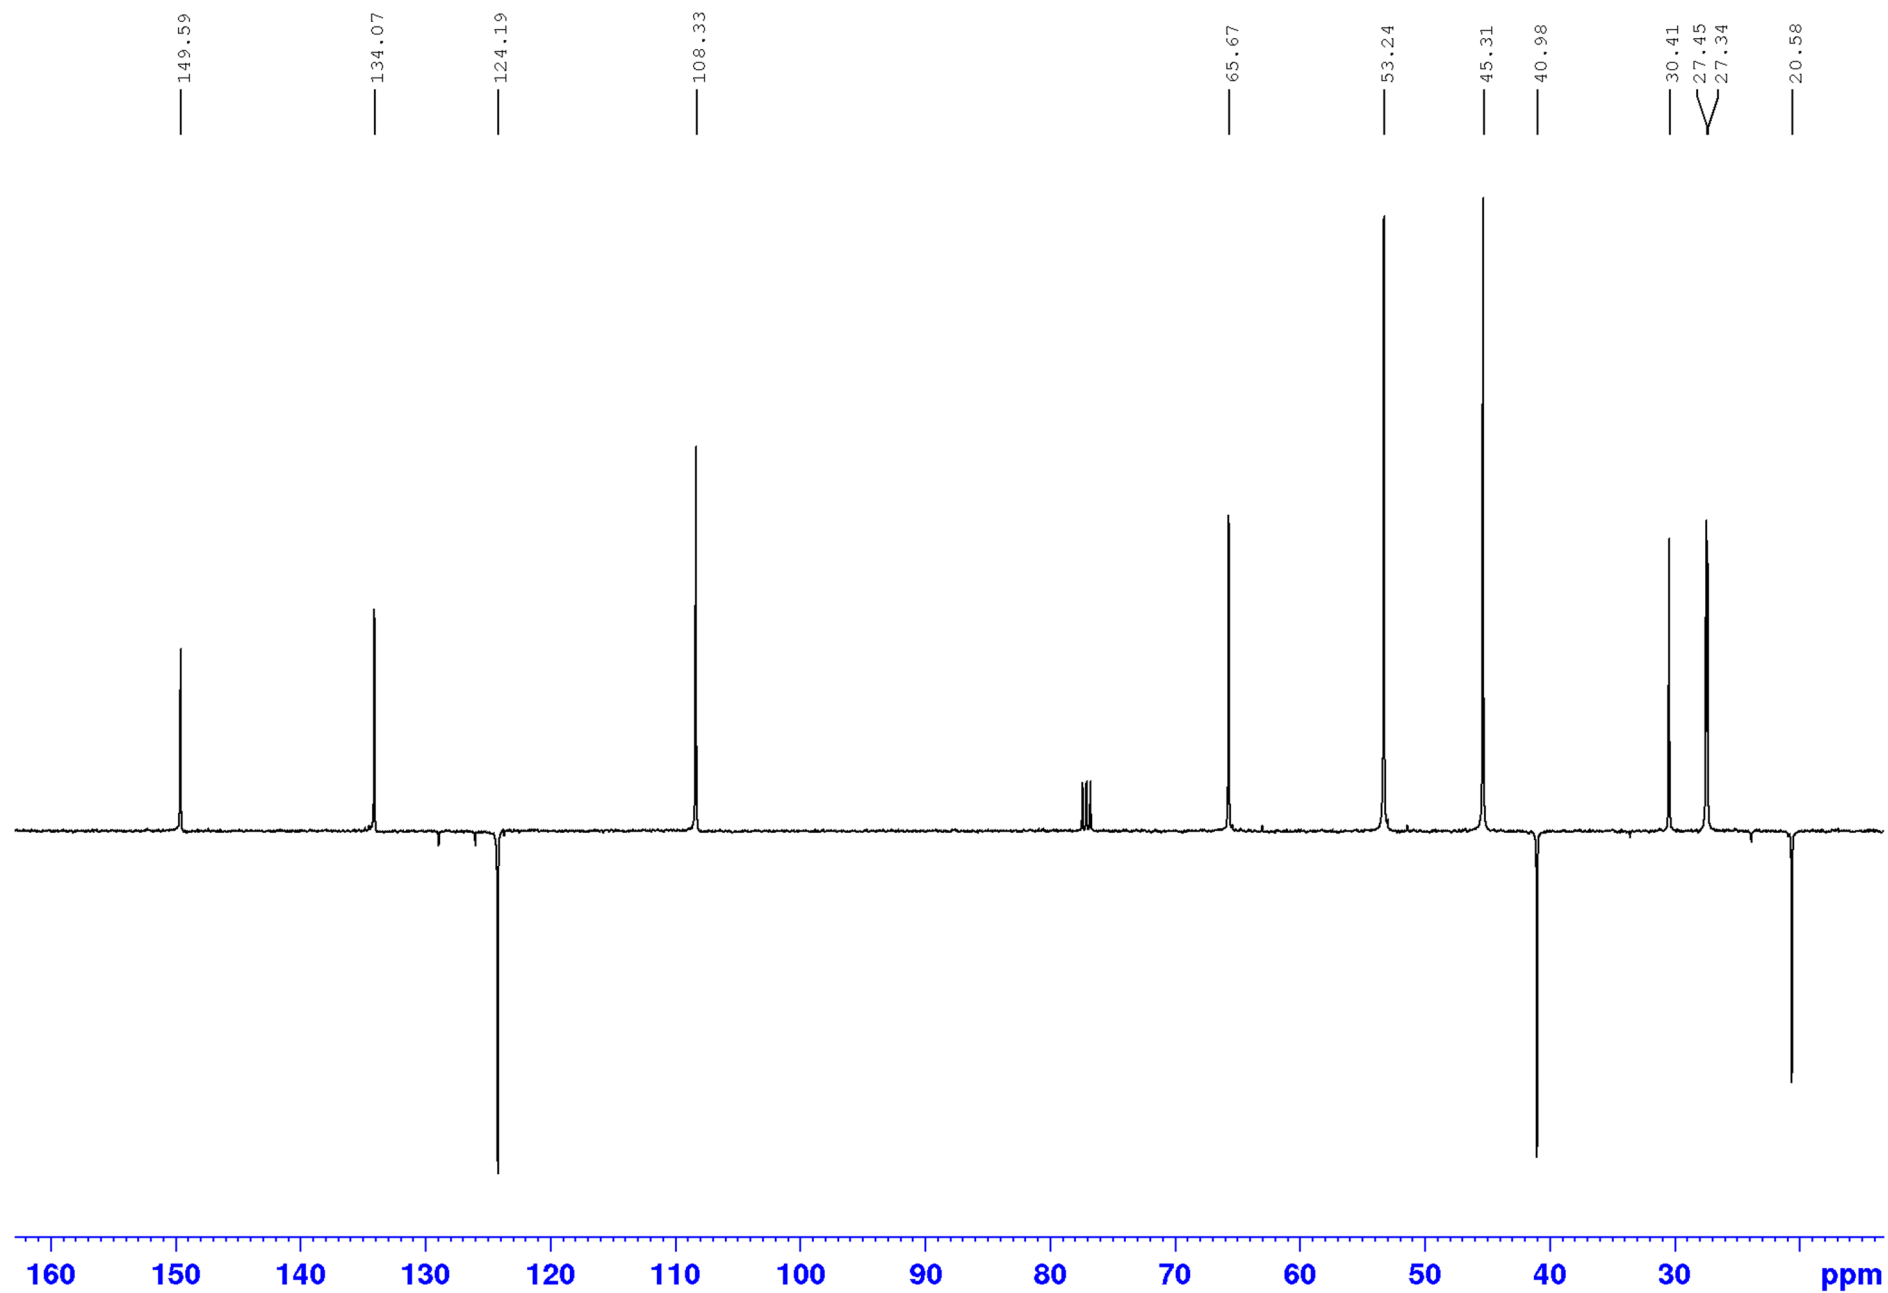

**Figure S2.**  $^{13}\text{C}$ -NMR spectroscopic data for compound **9b**.

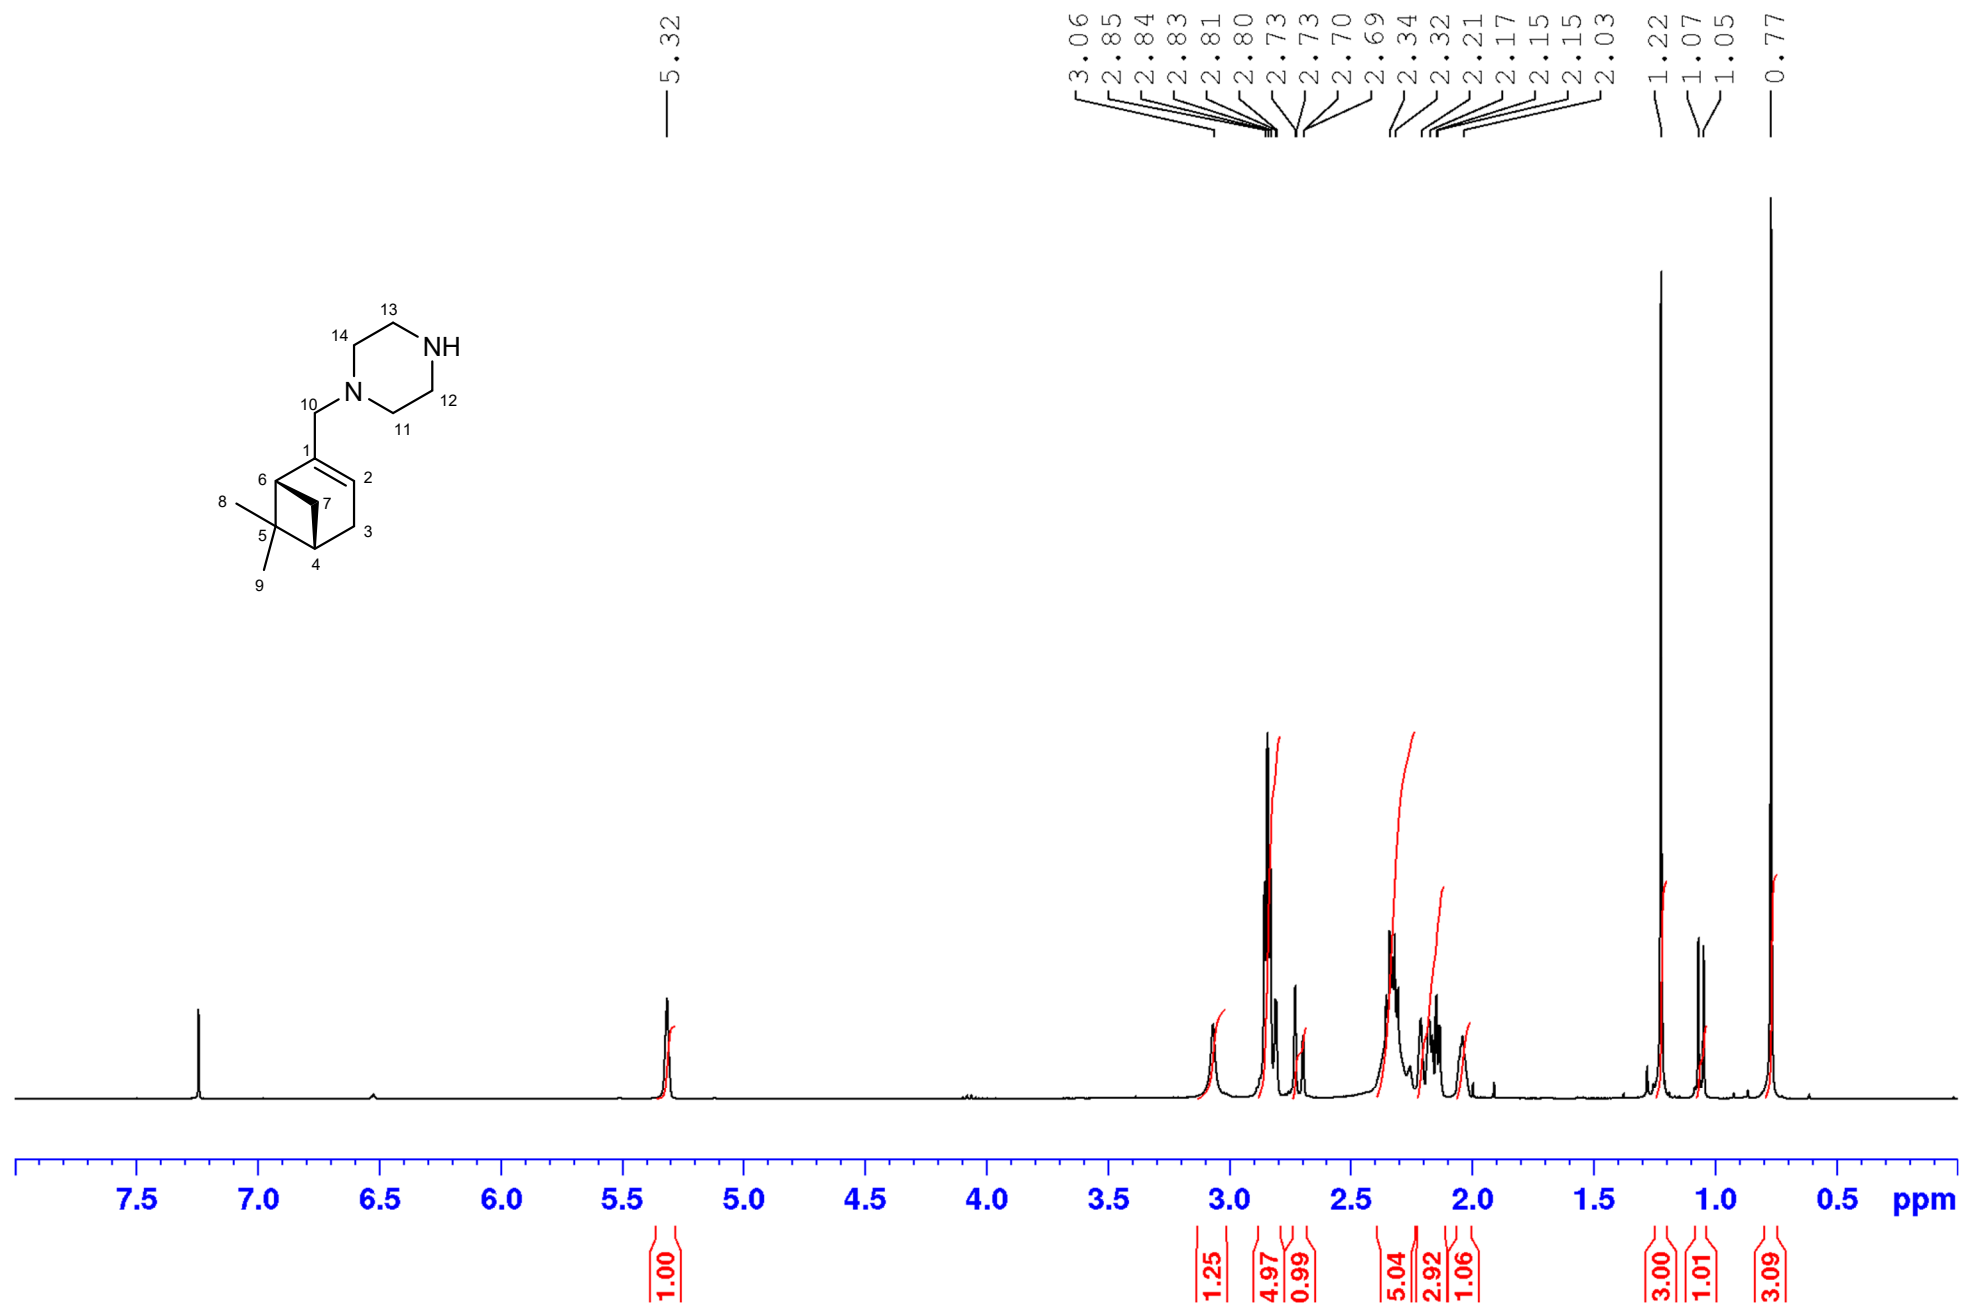

**Figure S3.**  $^1\text{H}$ -NMR spectroscopic data for compound **9c**.

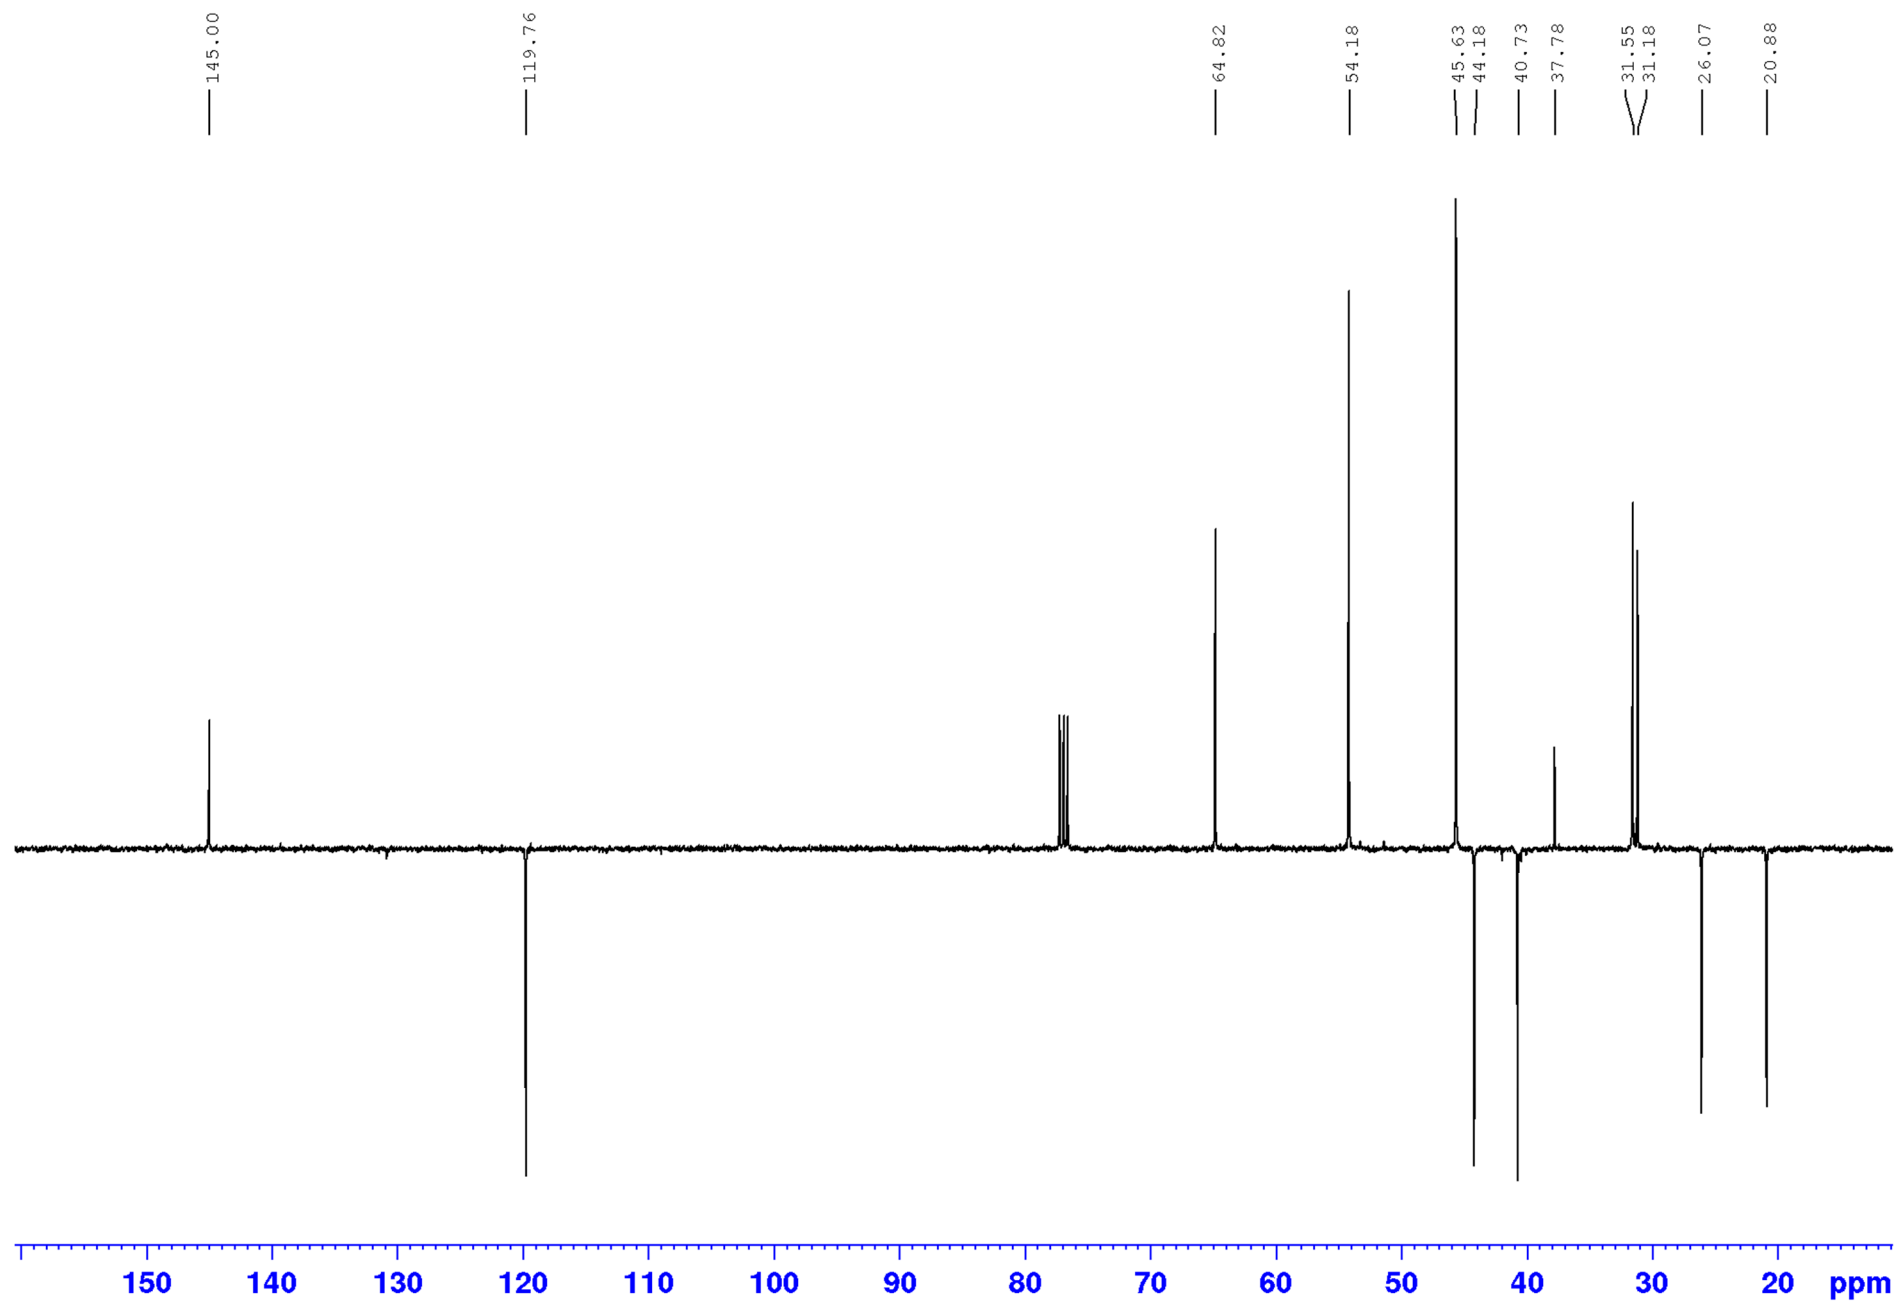

**Figure S4.**  $^{13}\text{C}$ -NMR spectroscopic data for compound **9c**.

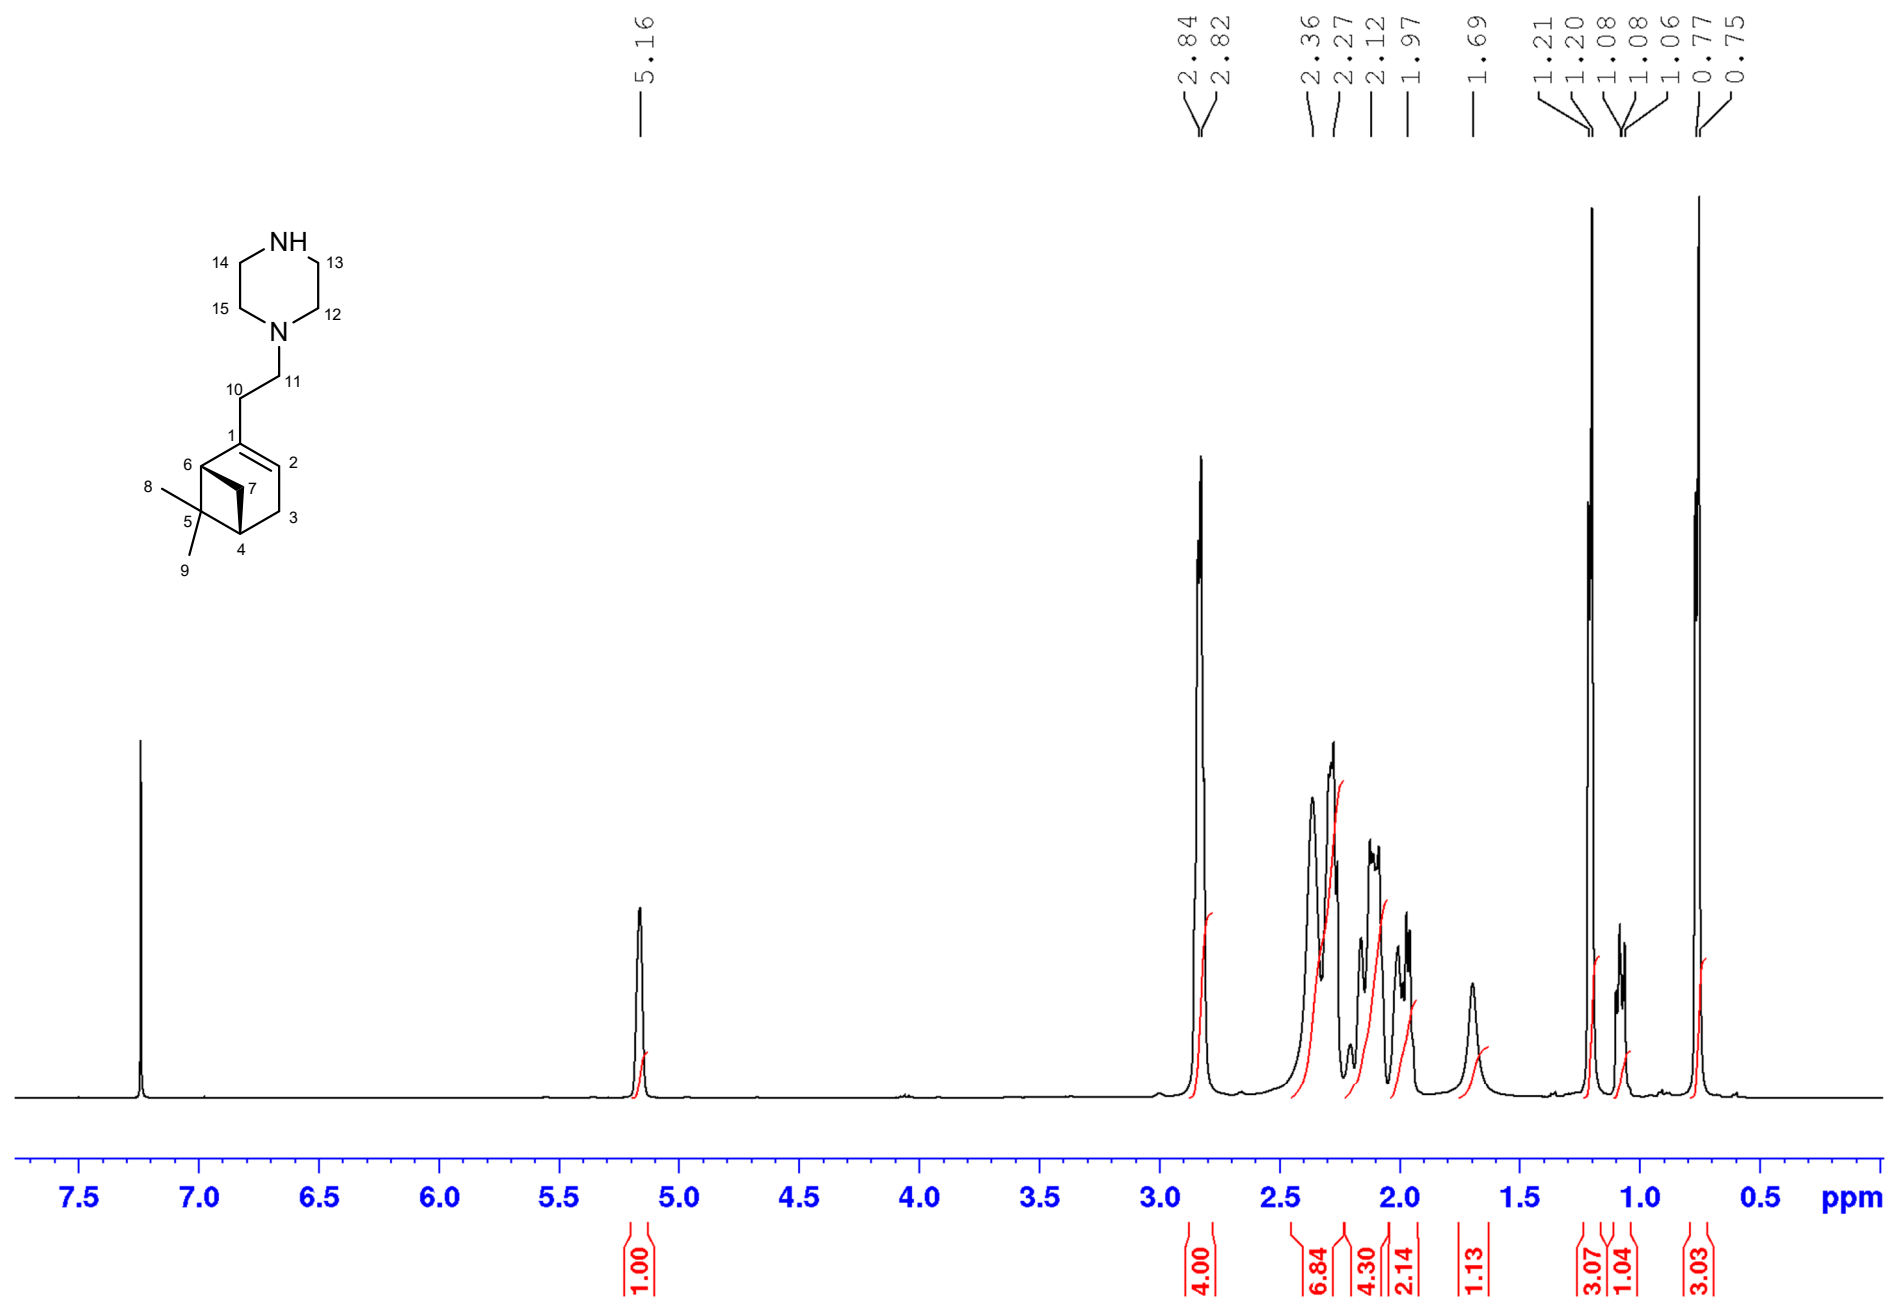

**Figure S5.**  $^1\text{H}$ -NMR spectroscopic data for compound 9d.

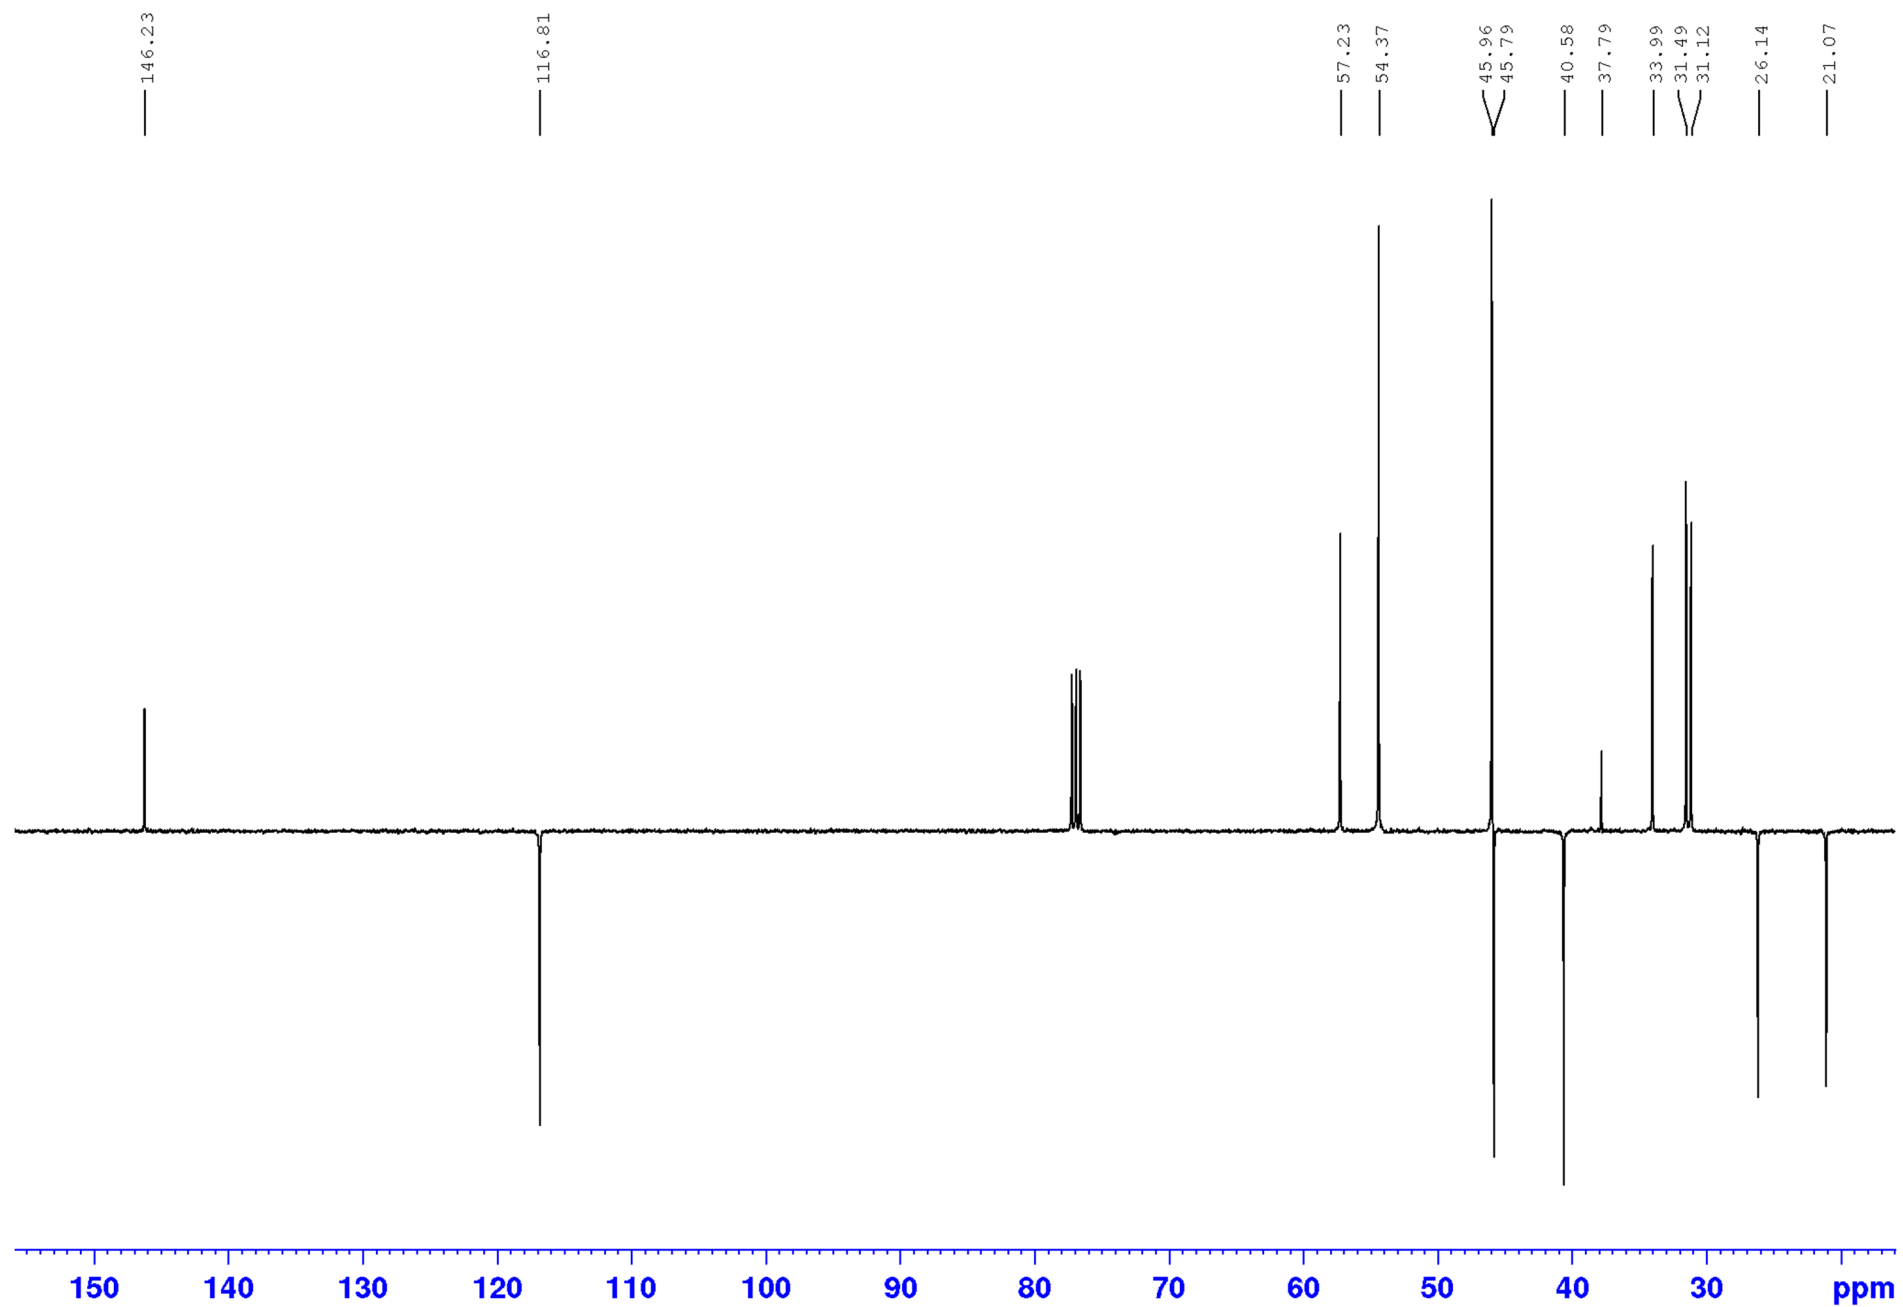

**Figure S6.**  $^{13}\text{C}$ -NMR spectroscopic data for compound **9d**.

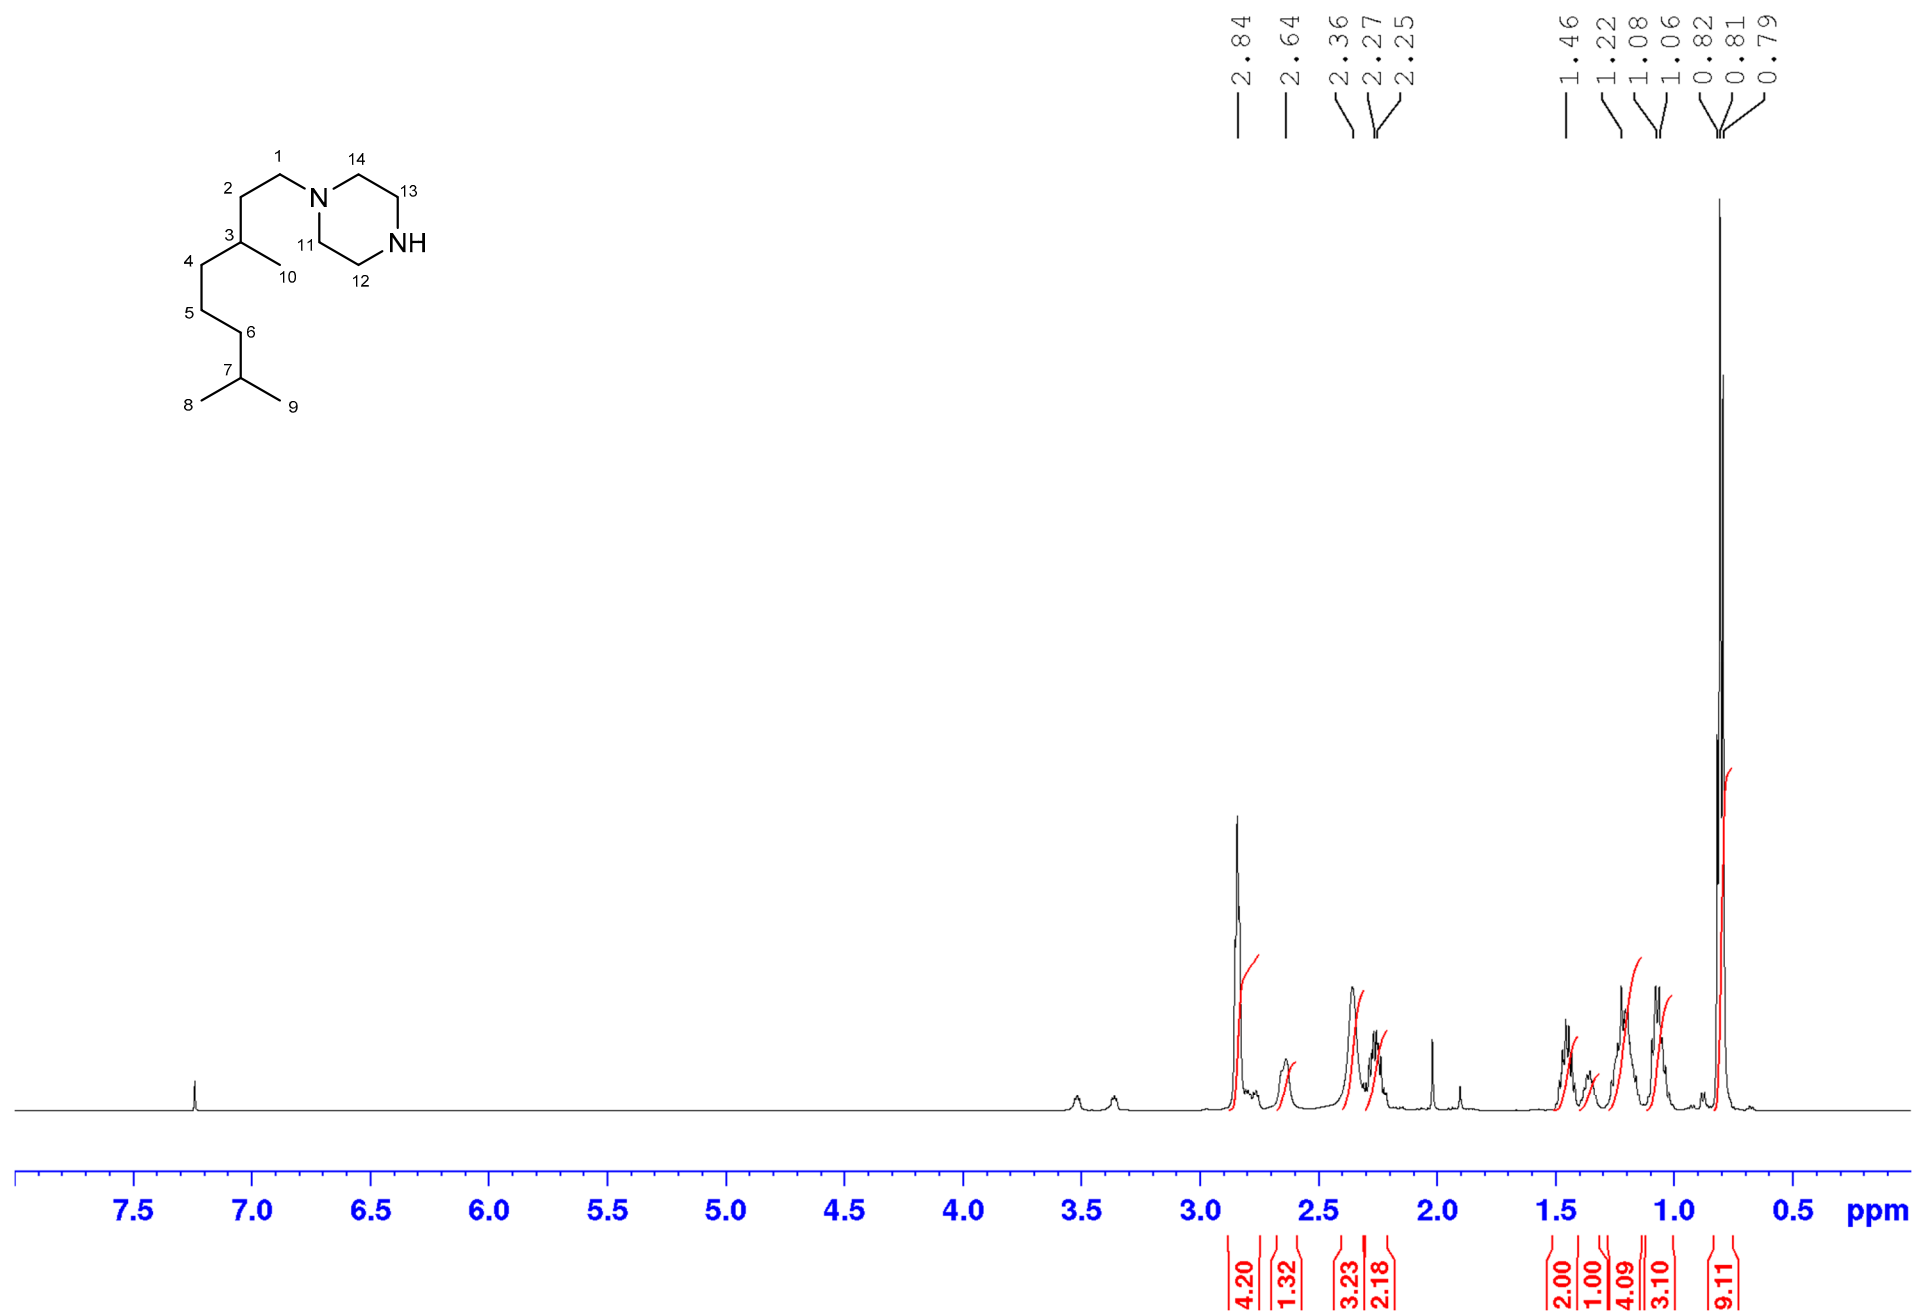

**Figure S7.** <sup>1</sup>H-NMR spectroscopic data for compound **9g**.



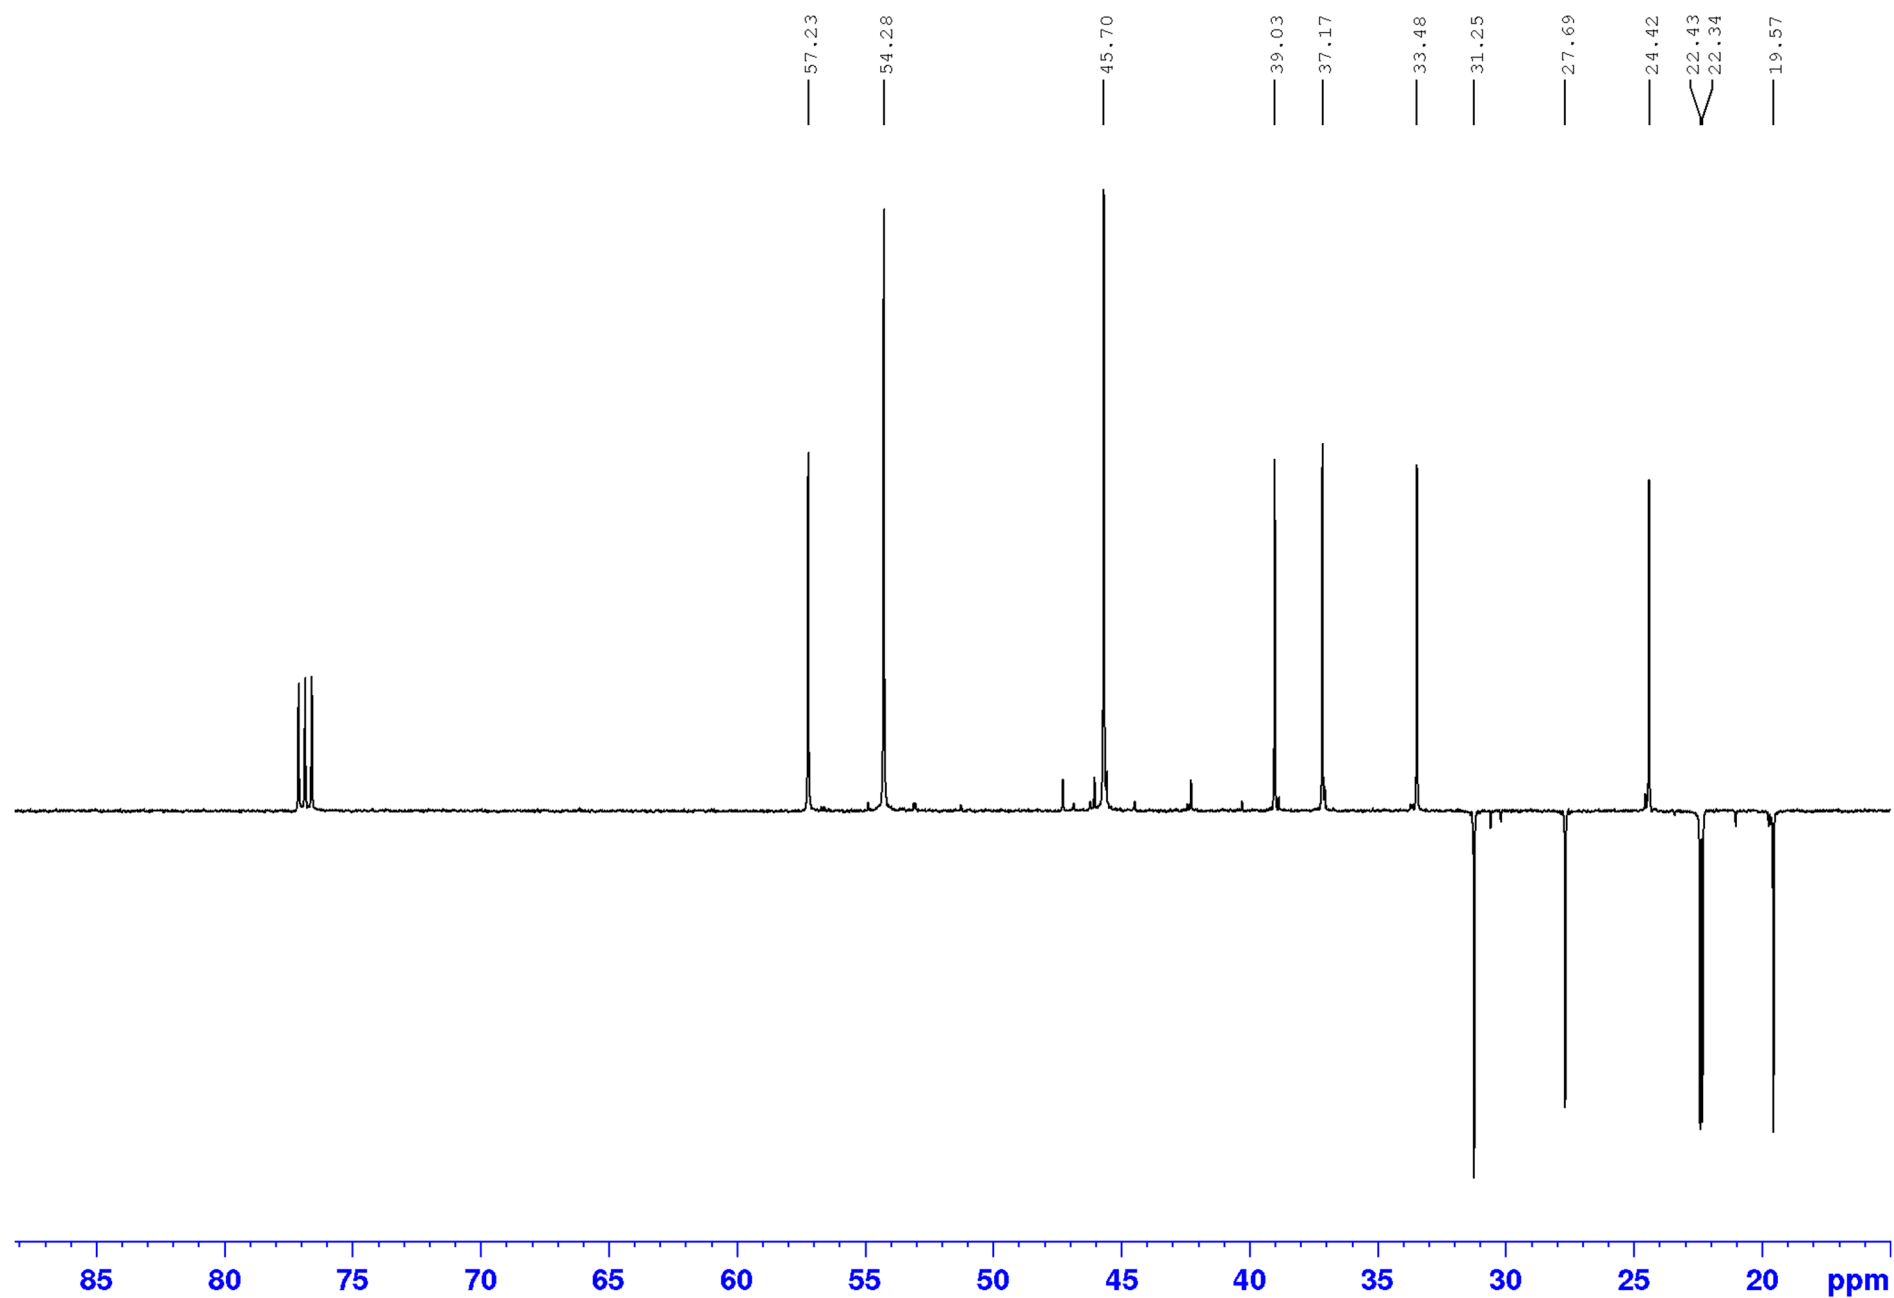

**Figure S8.** <sup>13</sup>C-NMR spectroscopic data for compound **9g**.

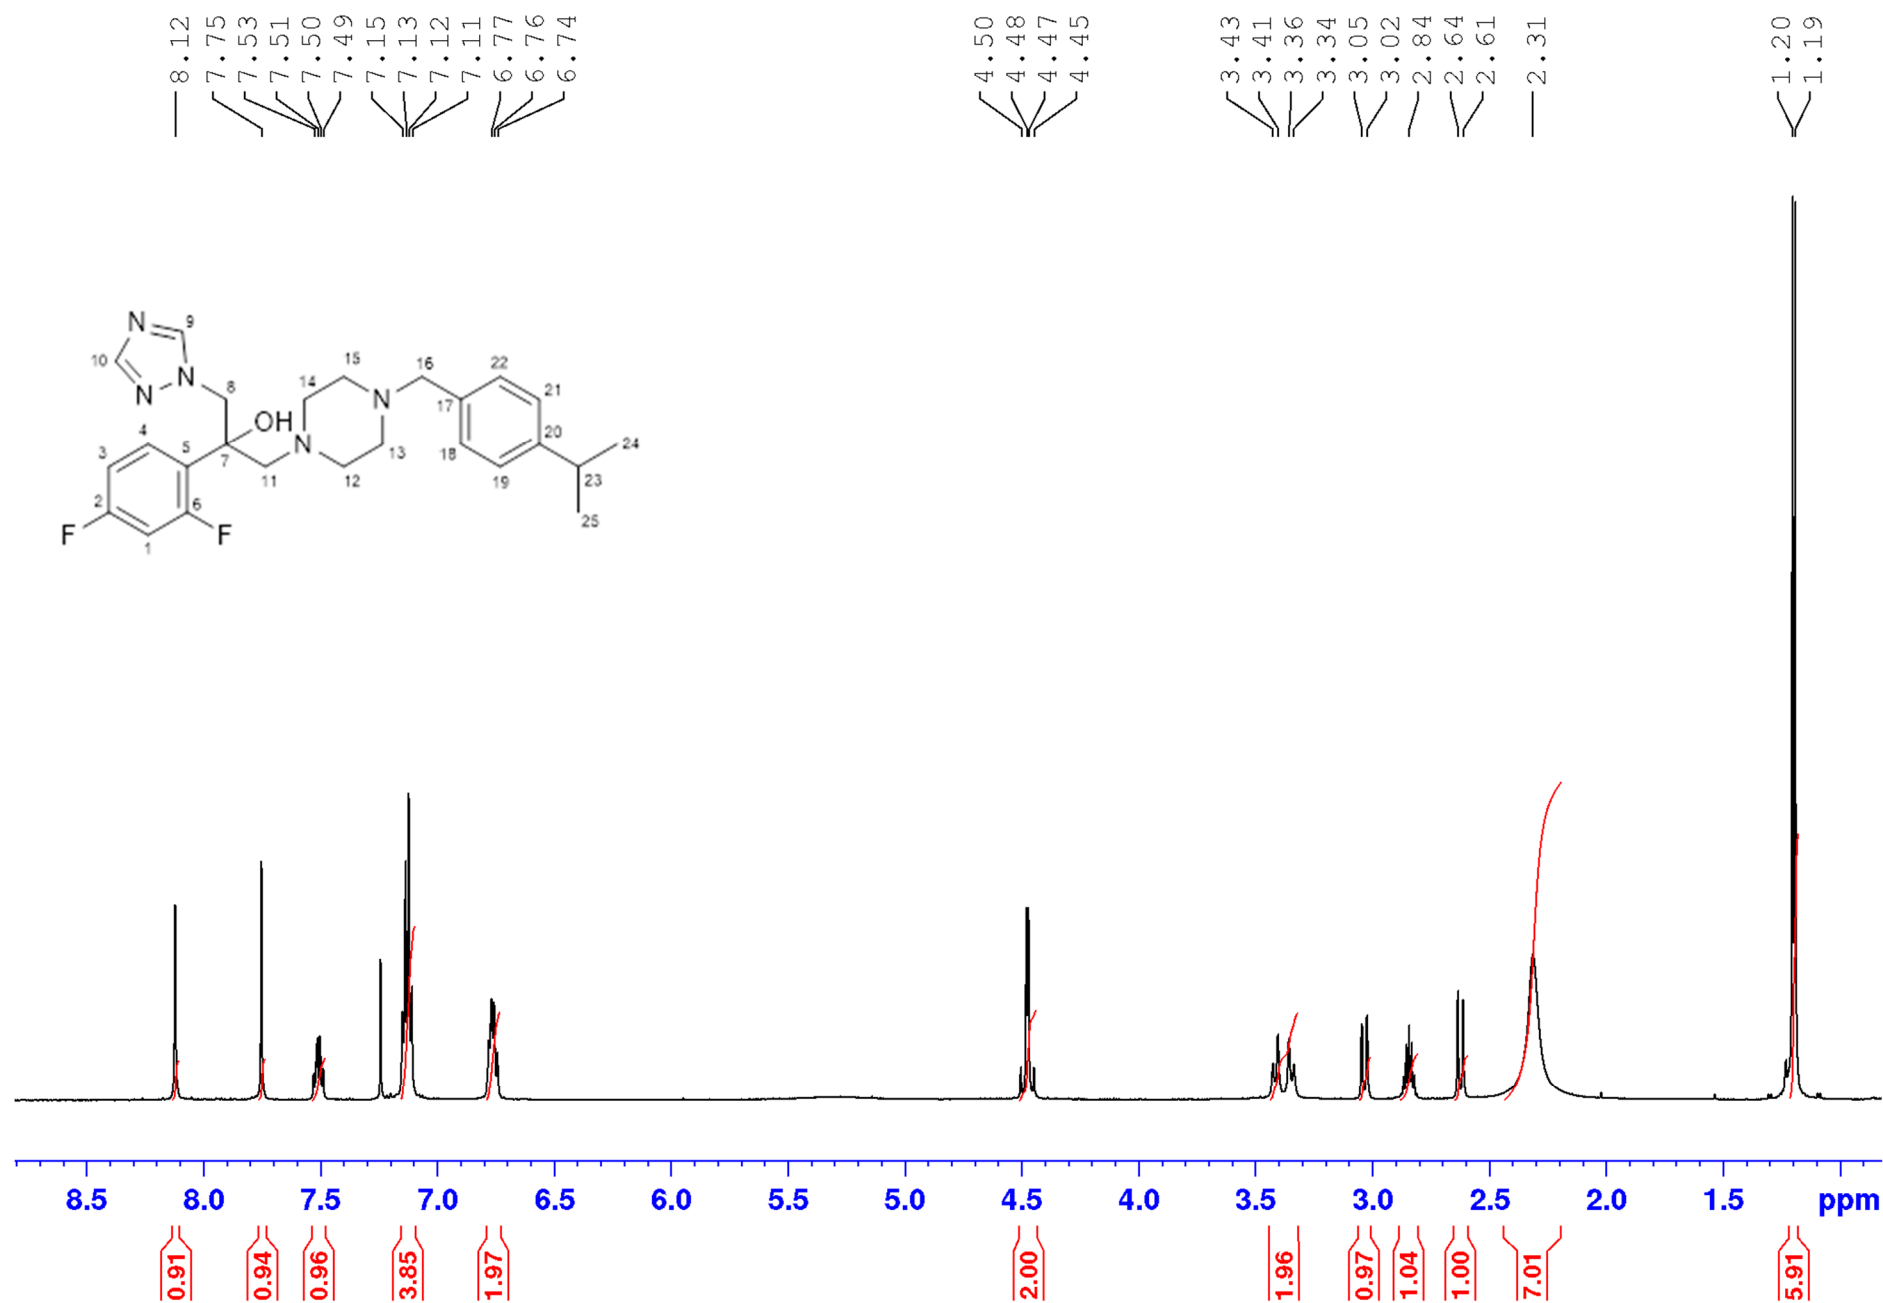

**Figure S9.** <sup>1</sup>H-NMR spectroscopic data for compound **10a**.

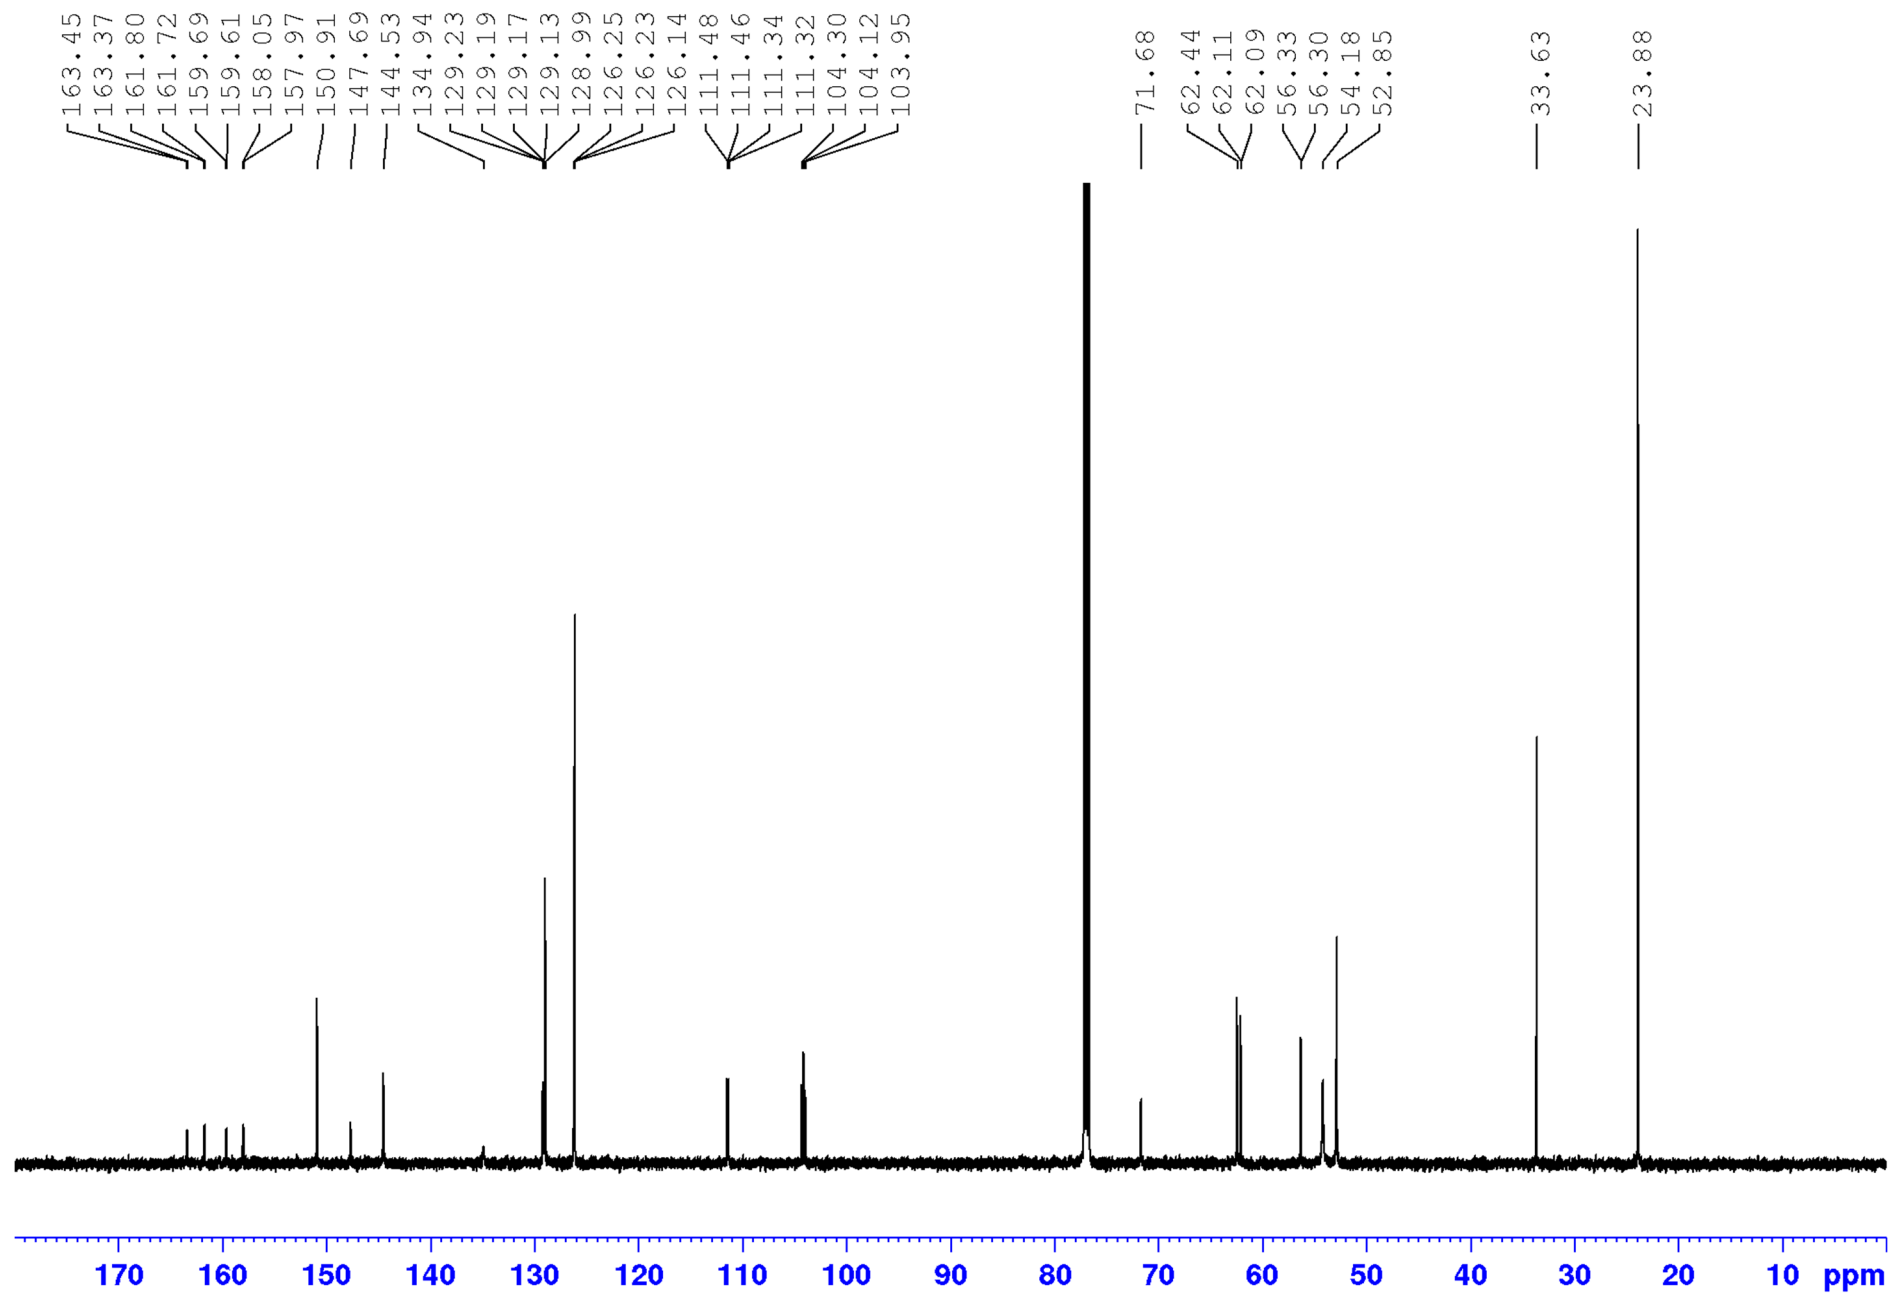

**Figure S10.**  $^{13}\text{C}$ -NMR spectroscopic data for compound **10a**.

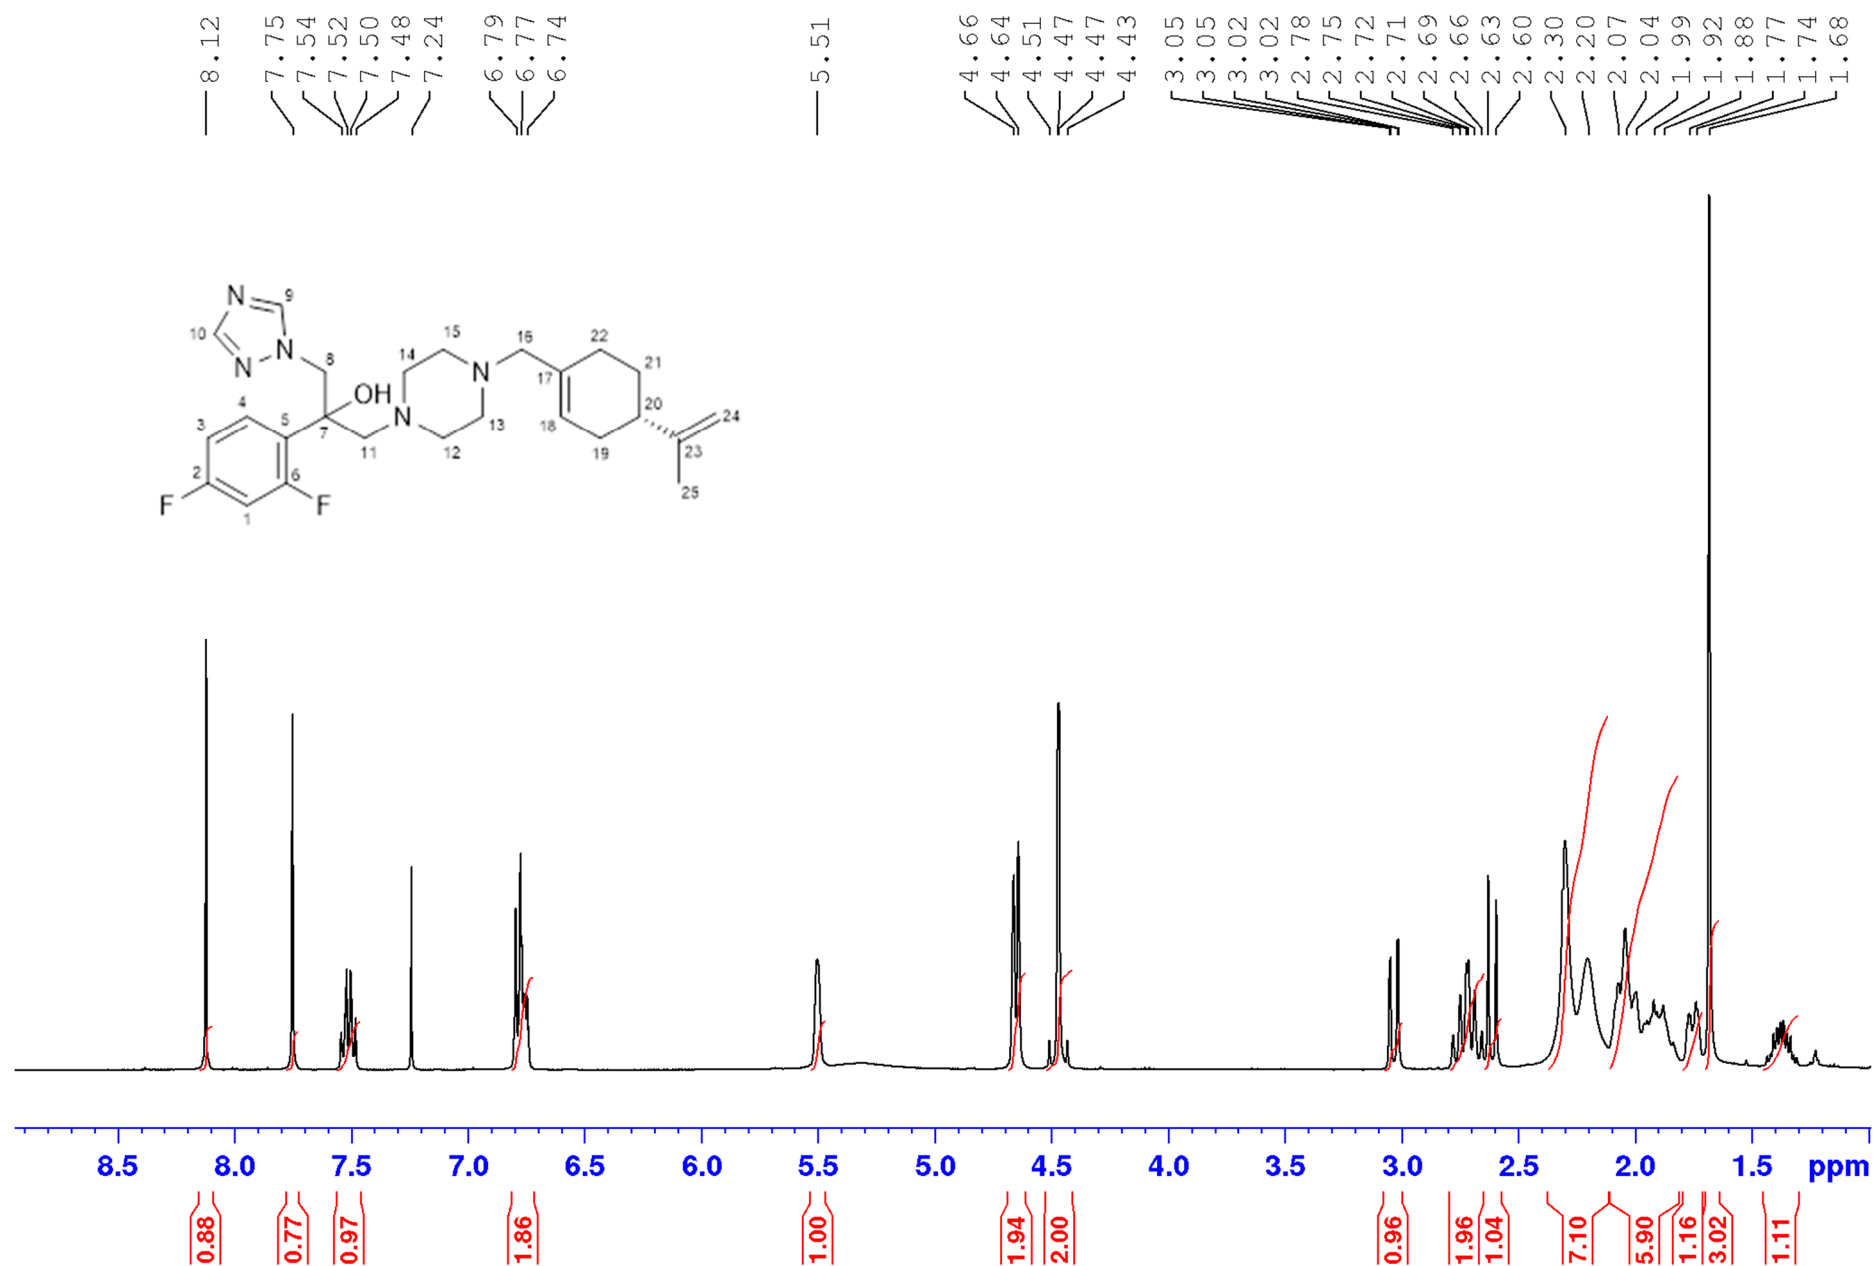

**Figure S11.** <sup>1</sup>H-NMR spectroscopic data for compound 10b.

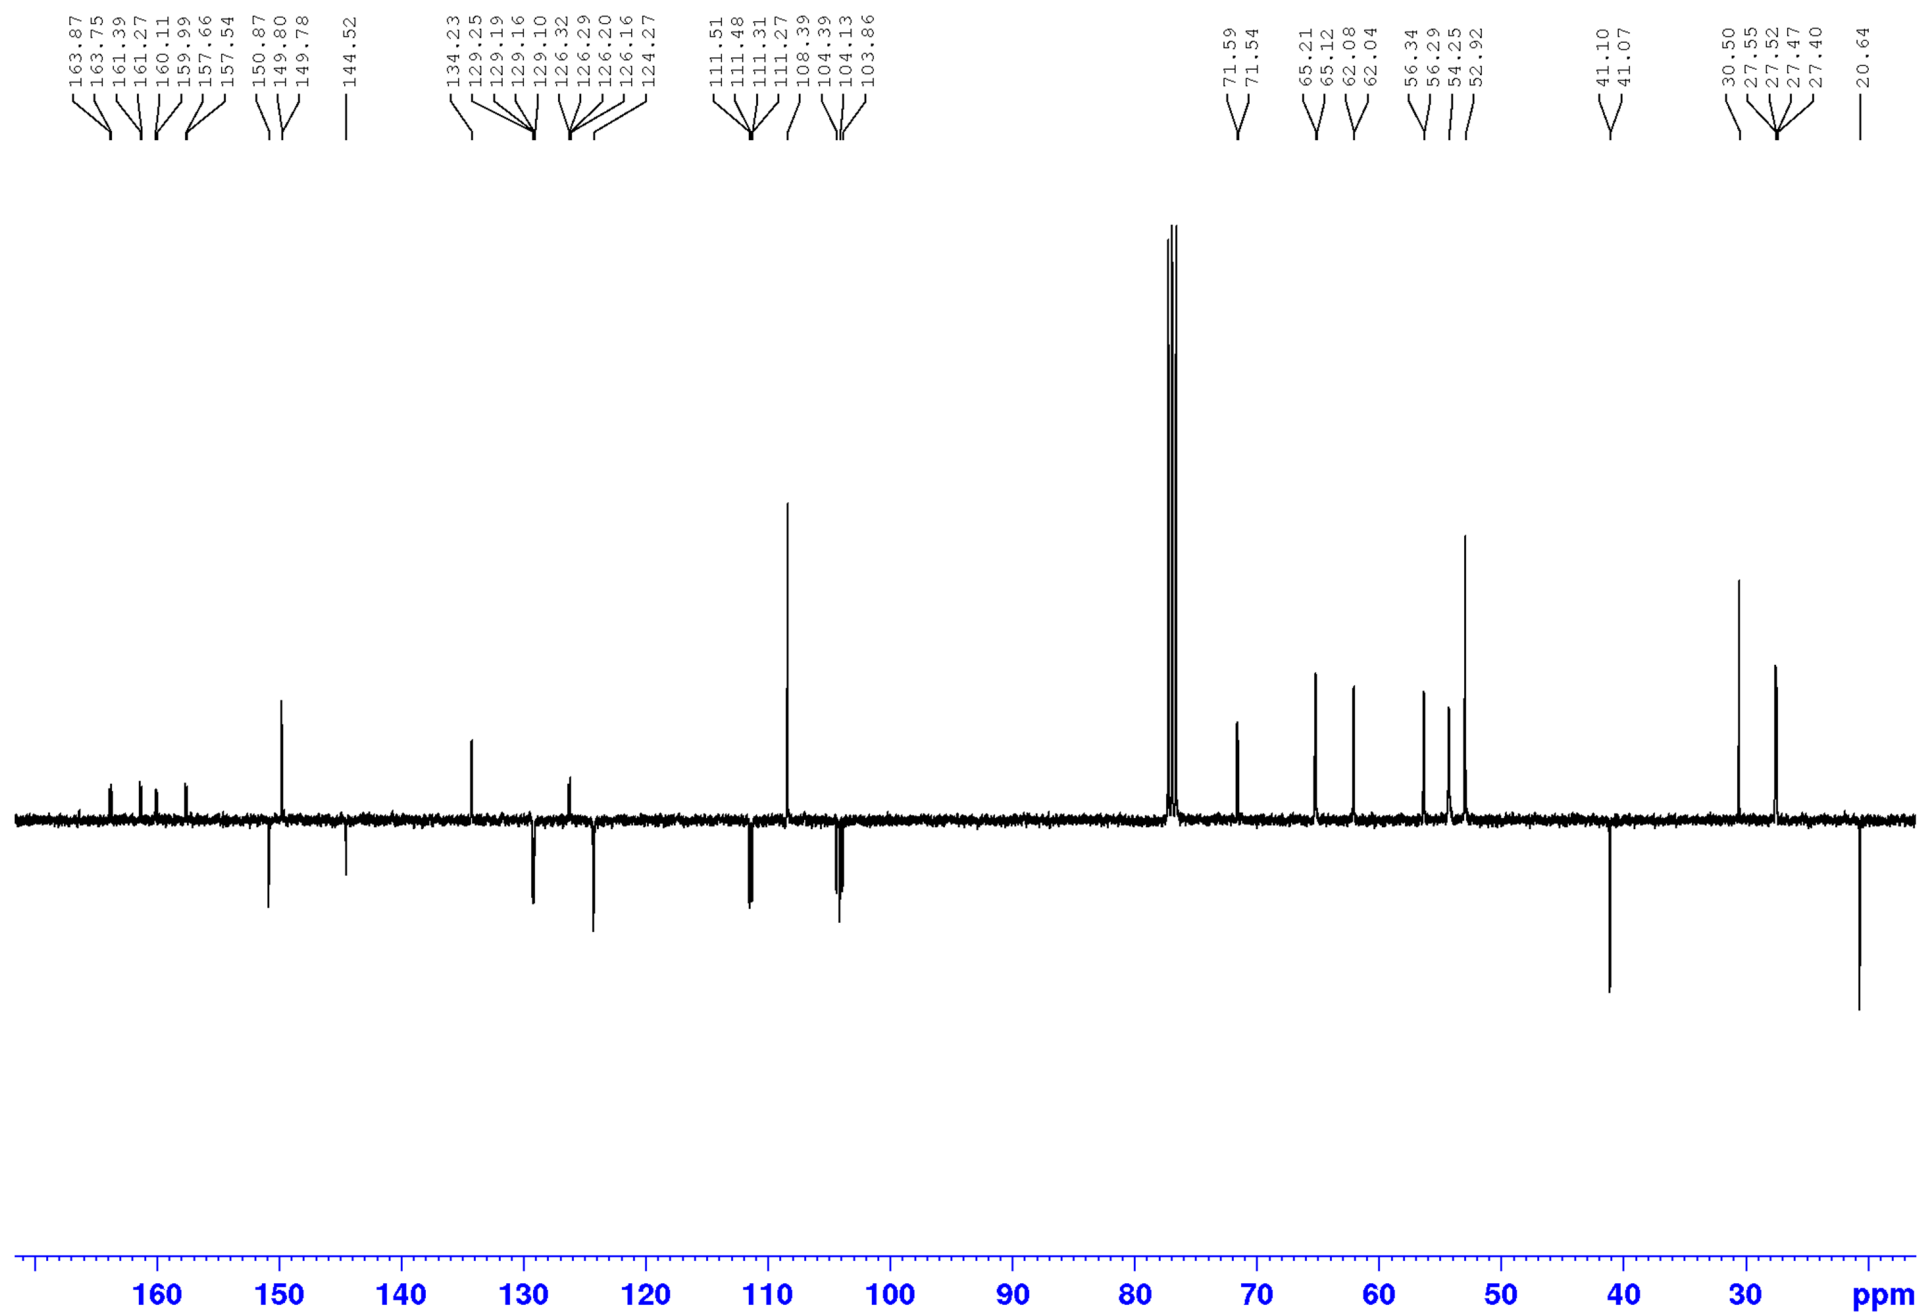

**Figure S12.** <sup>13</sup>C-NMR spectroscopic data for compound **10b**.

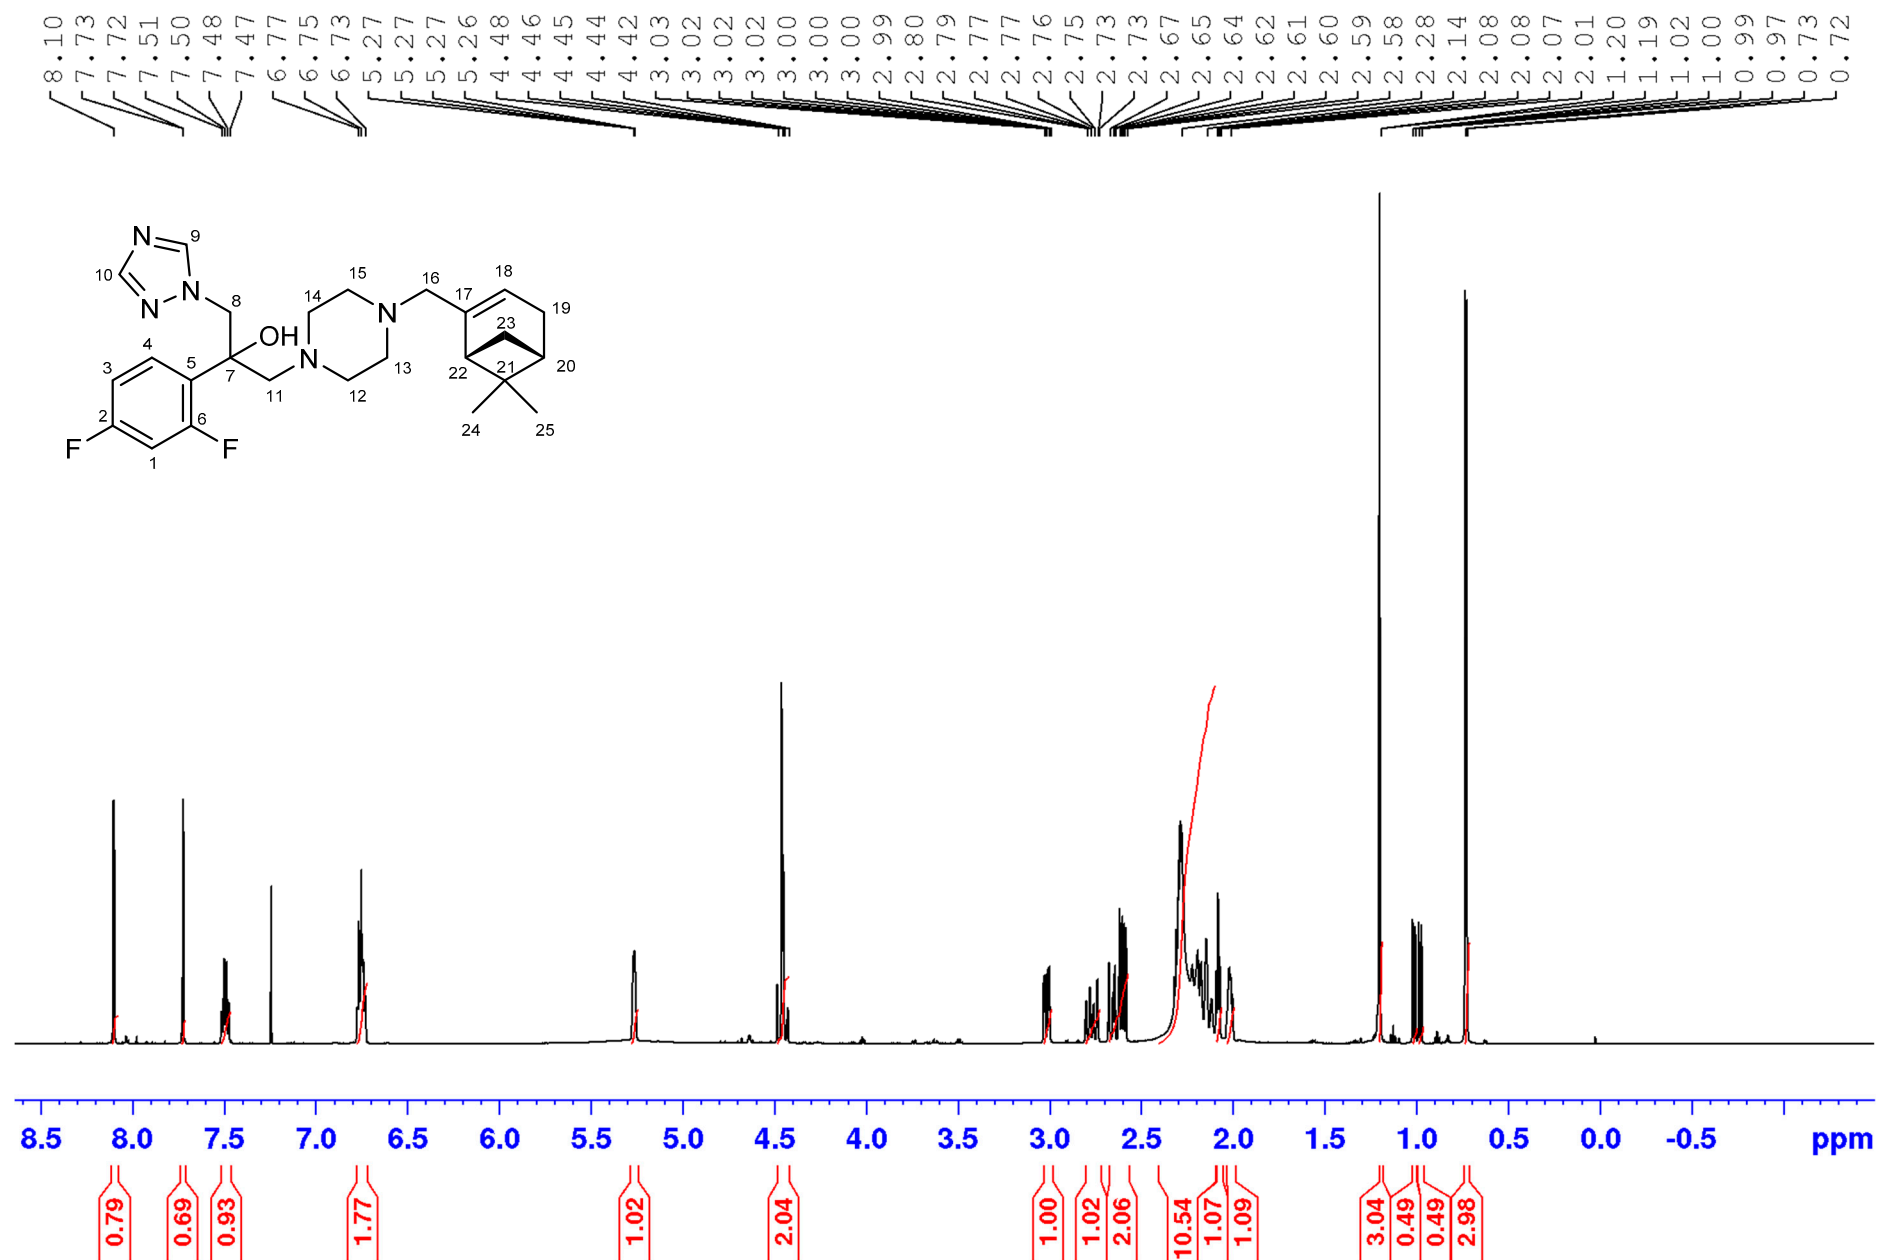

**Figure S13.**  $^{13}\text{C}$ -NMR spectroscopic data for compound **10c**.

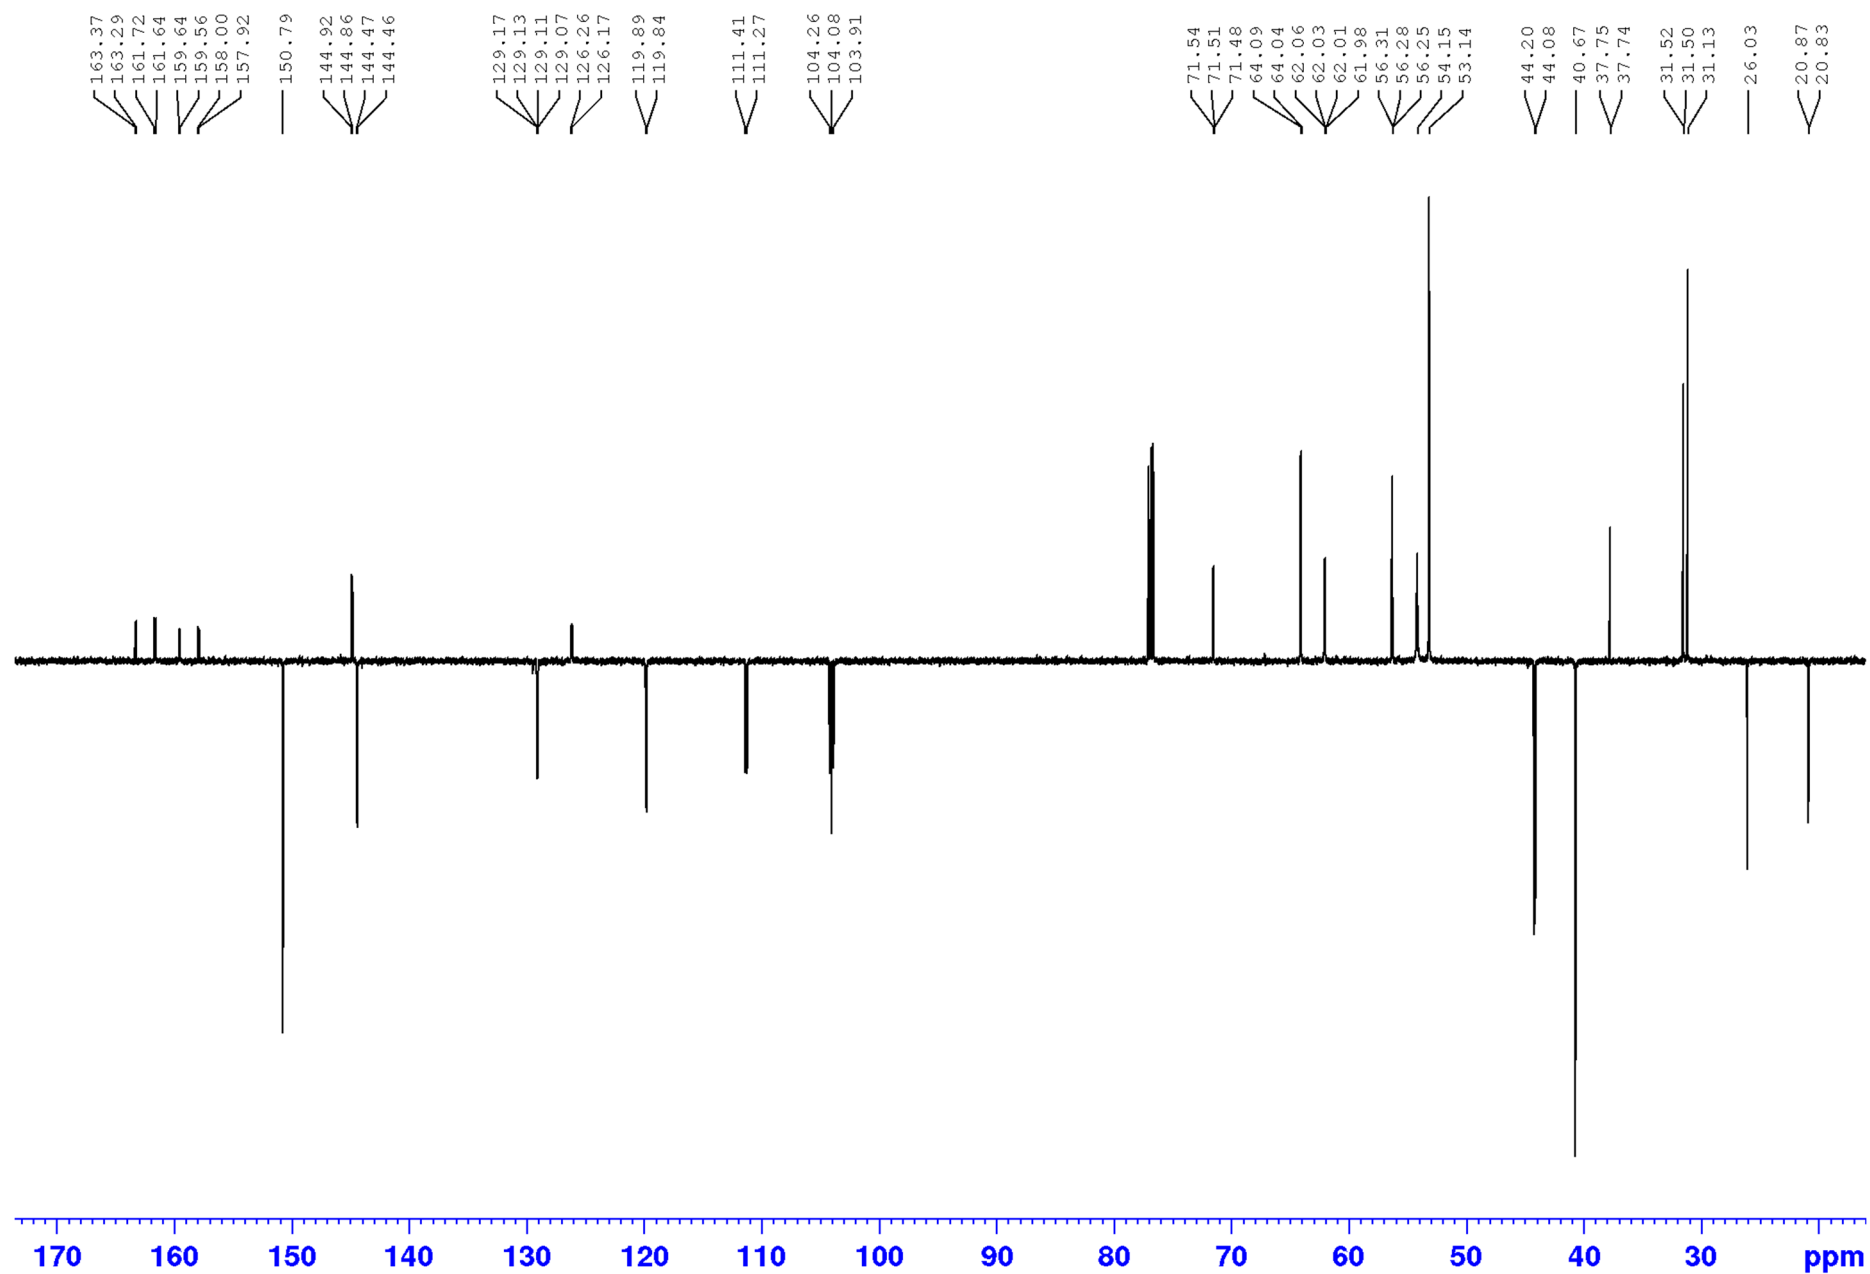

Figure S14. <sup>13</sup>C-NMR spectroscopic data for compound 10c.

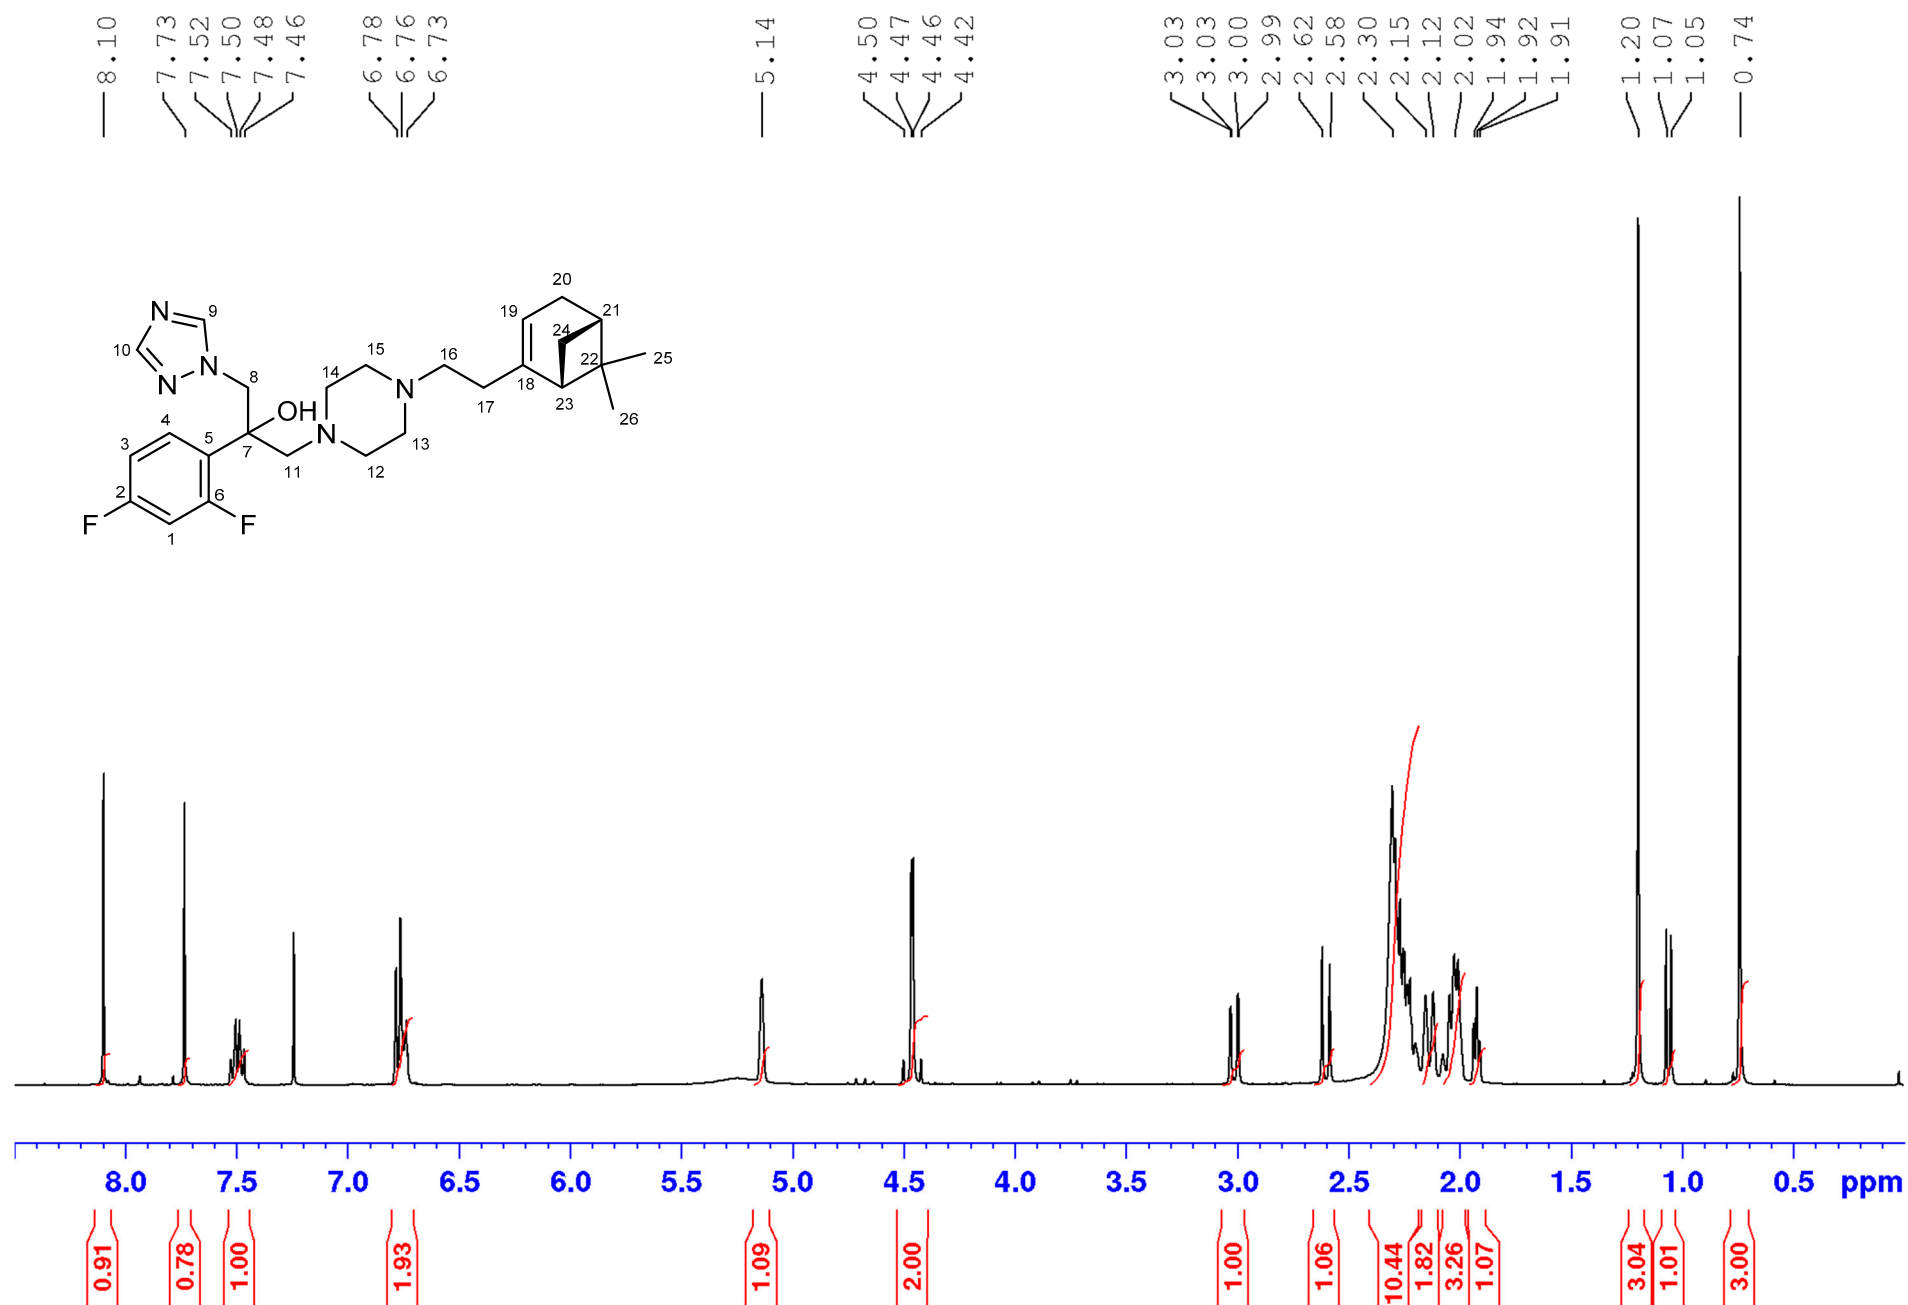

**Figure S15.** <sup>1</sup>H-NMR spectroscopic data for compound **10d**.



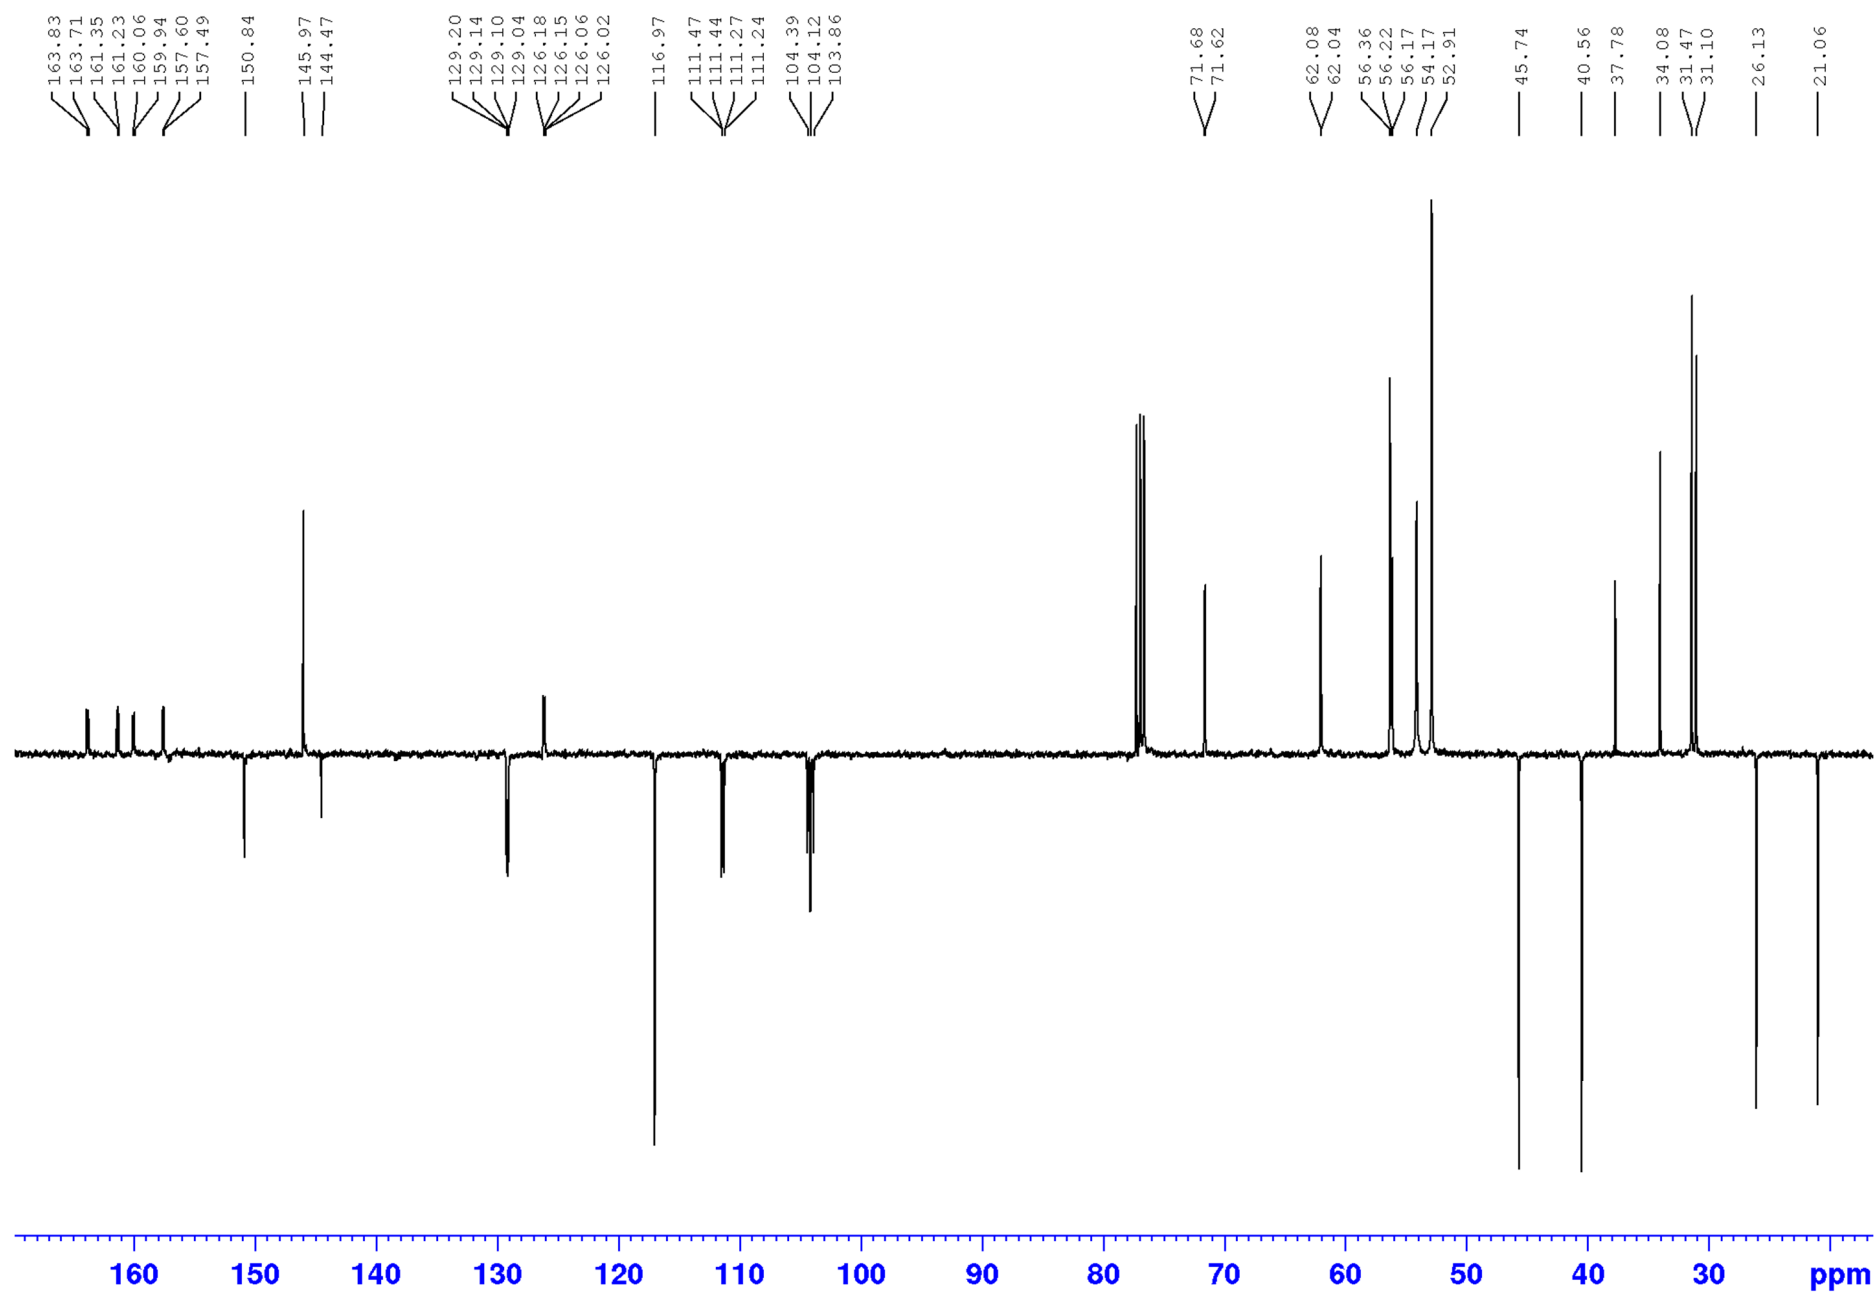

**Figure S16.**  $^{13}\text{C}$ -NMR spectroscopic data for compound 10d.

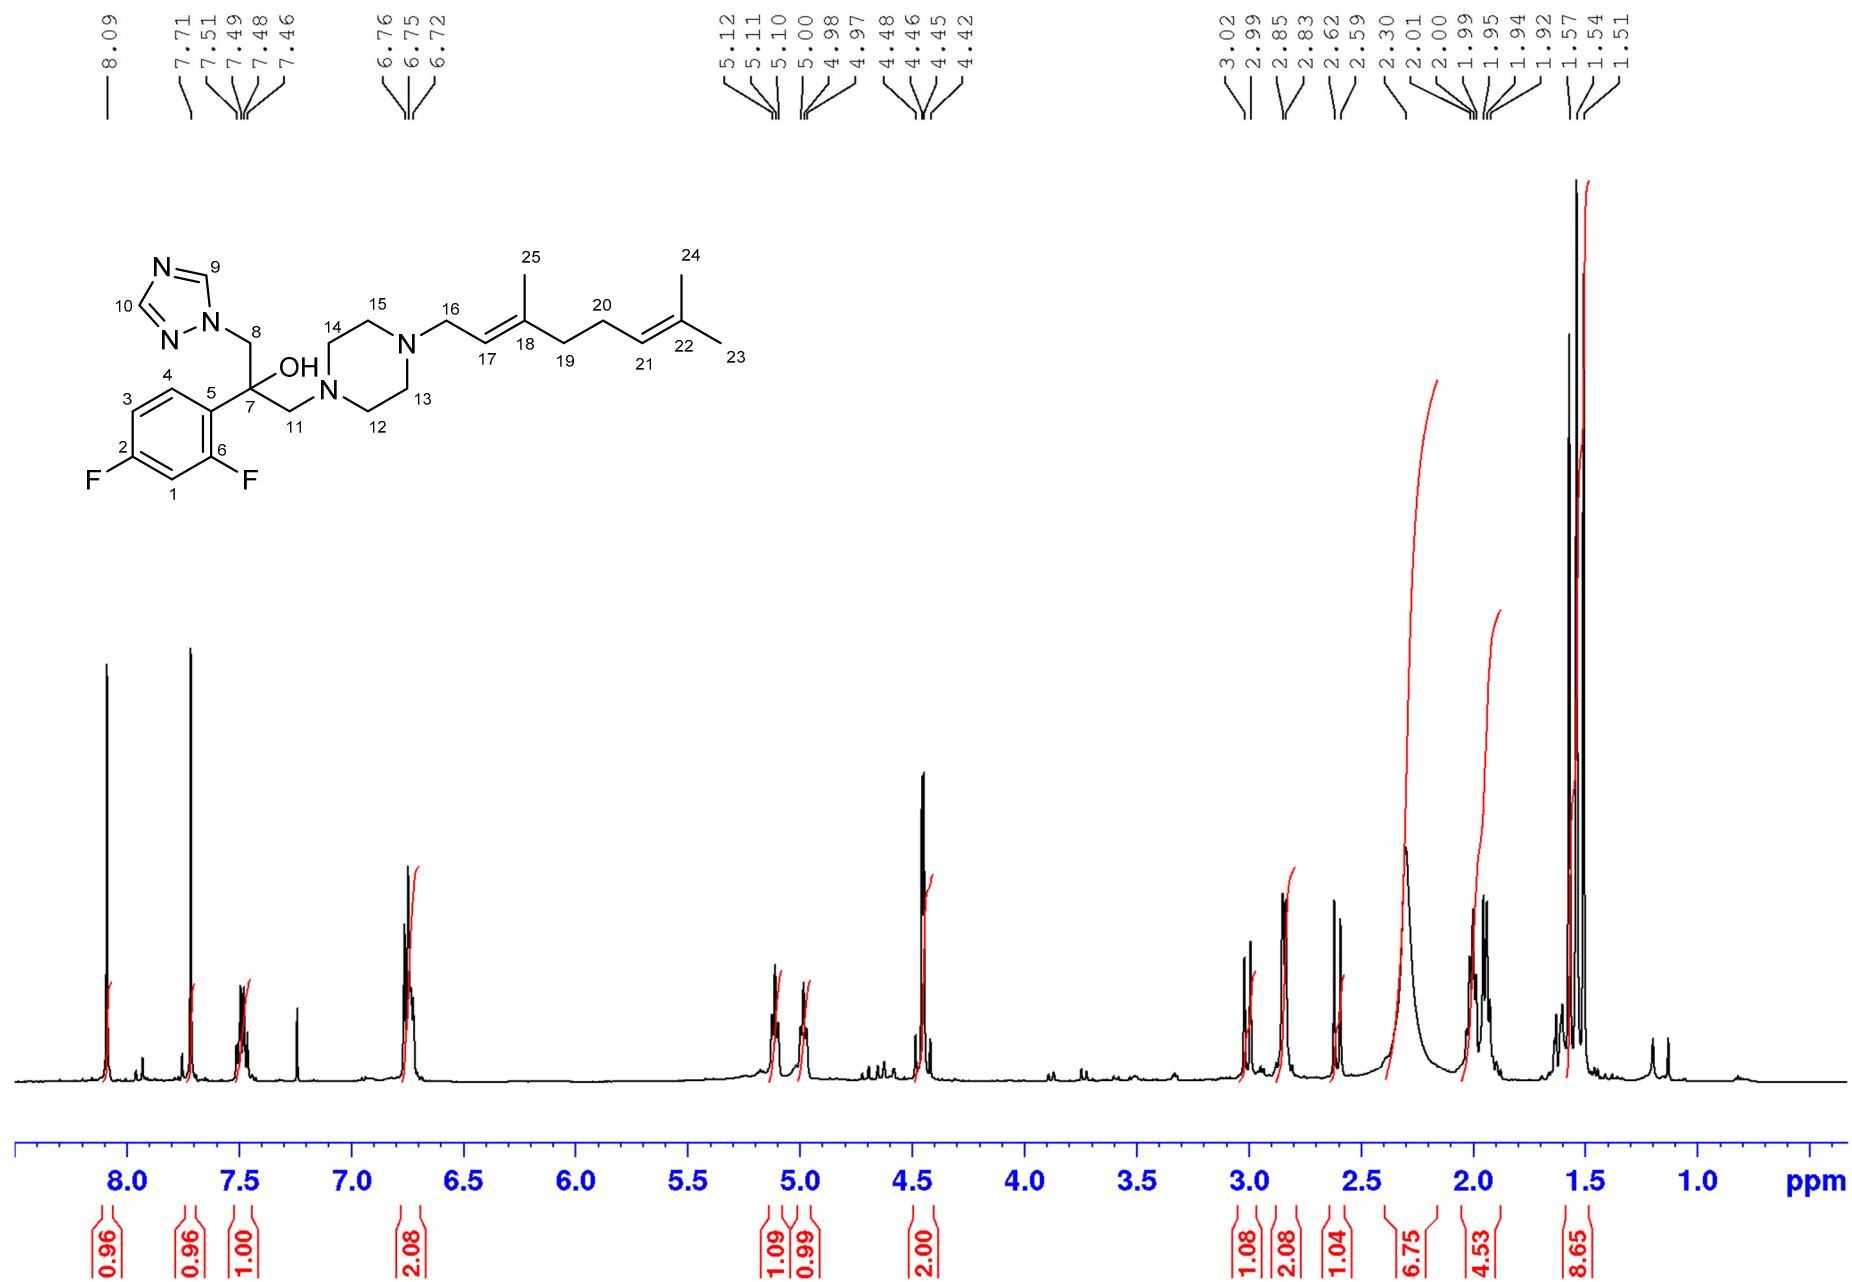

**Figure S17.** <sup>1</sup>H-NMR spectroscopic data for compound 10e.

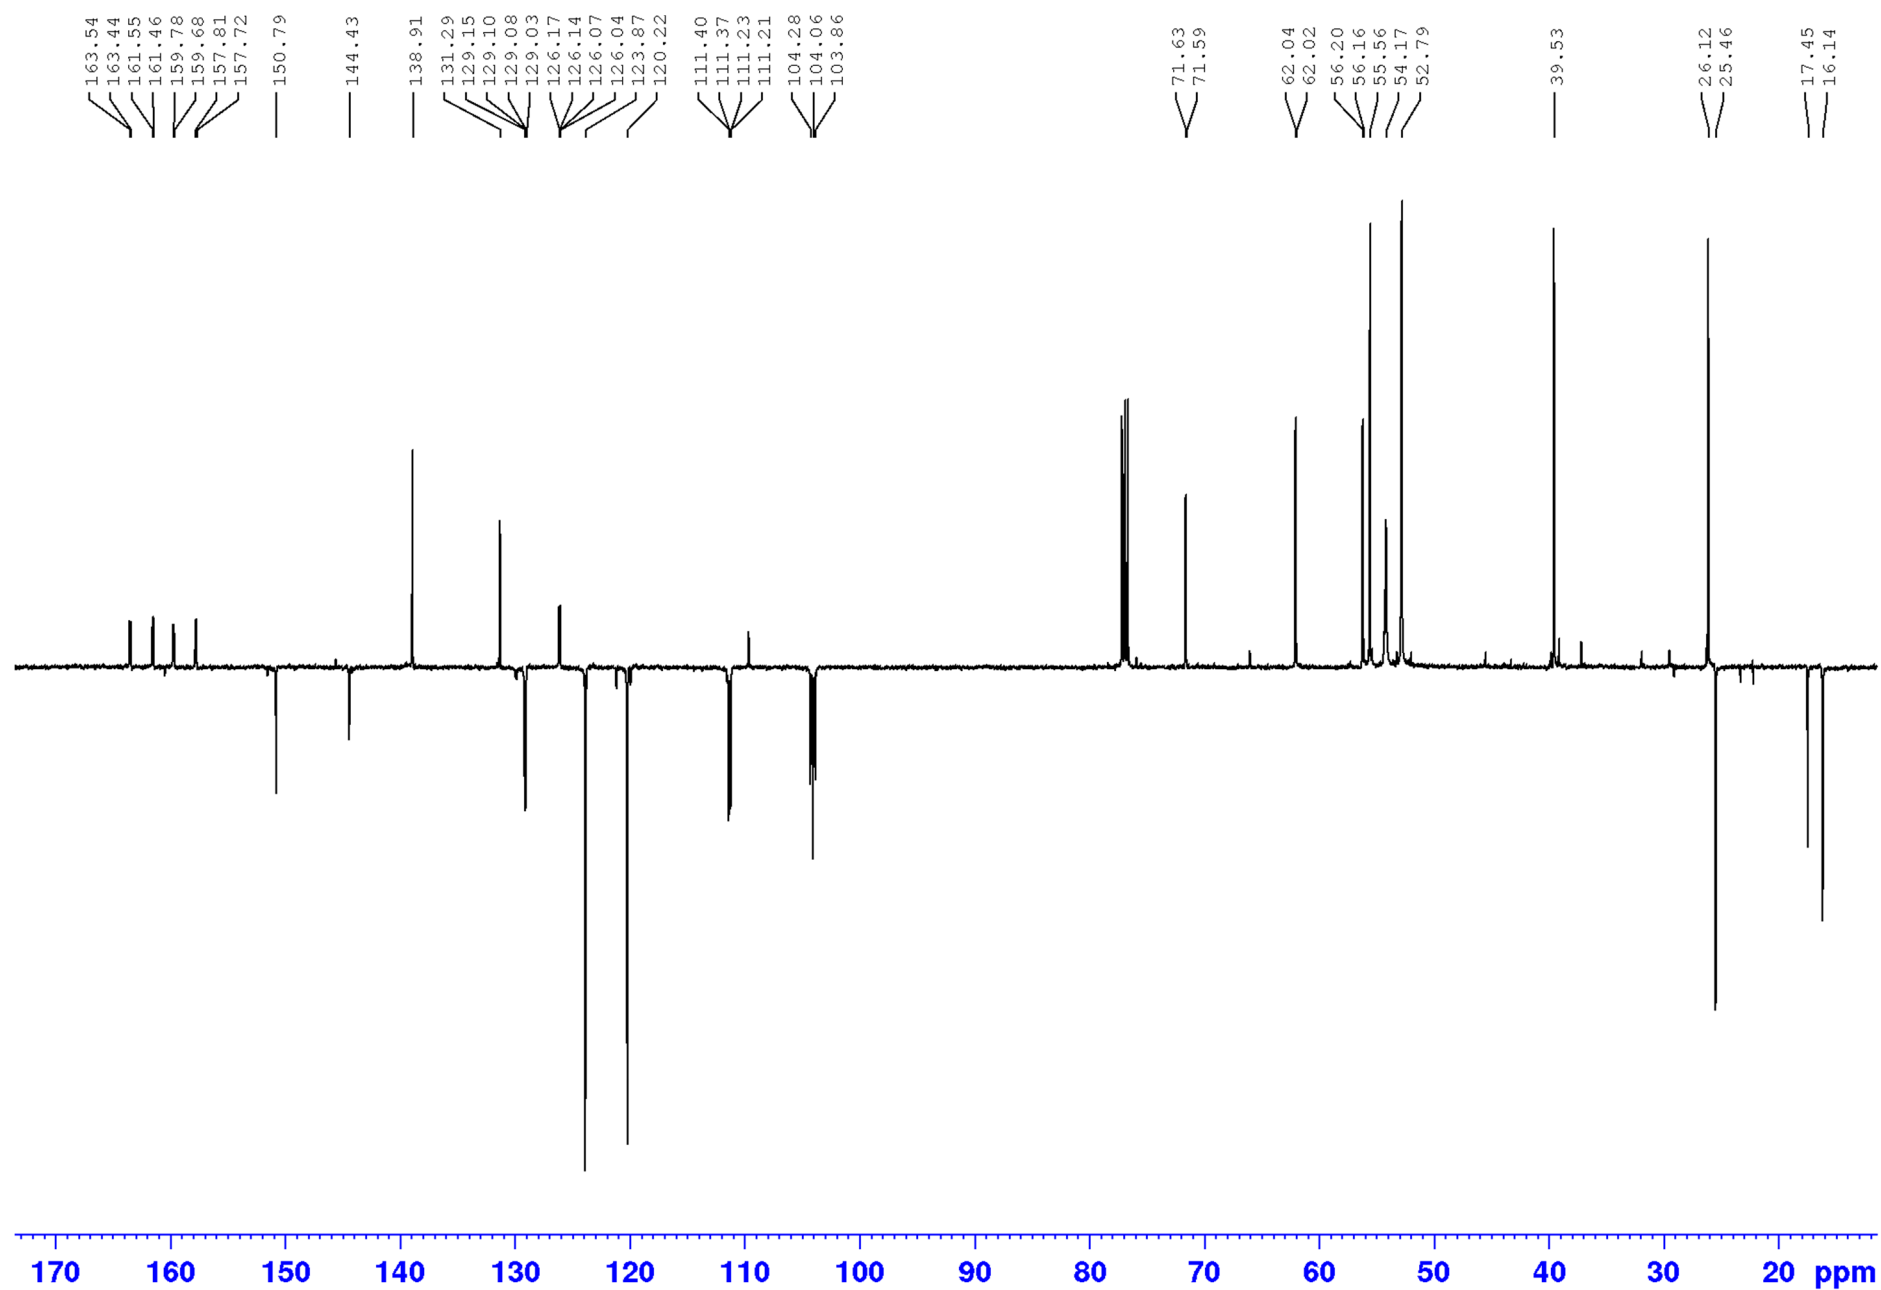

**Figure S18.**  $^{13}\text{C}$ -NMR spectroscopic data for compound **10e**.

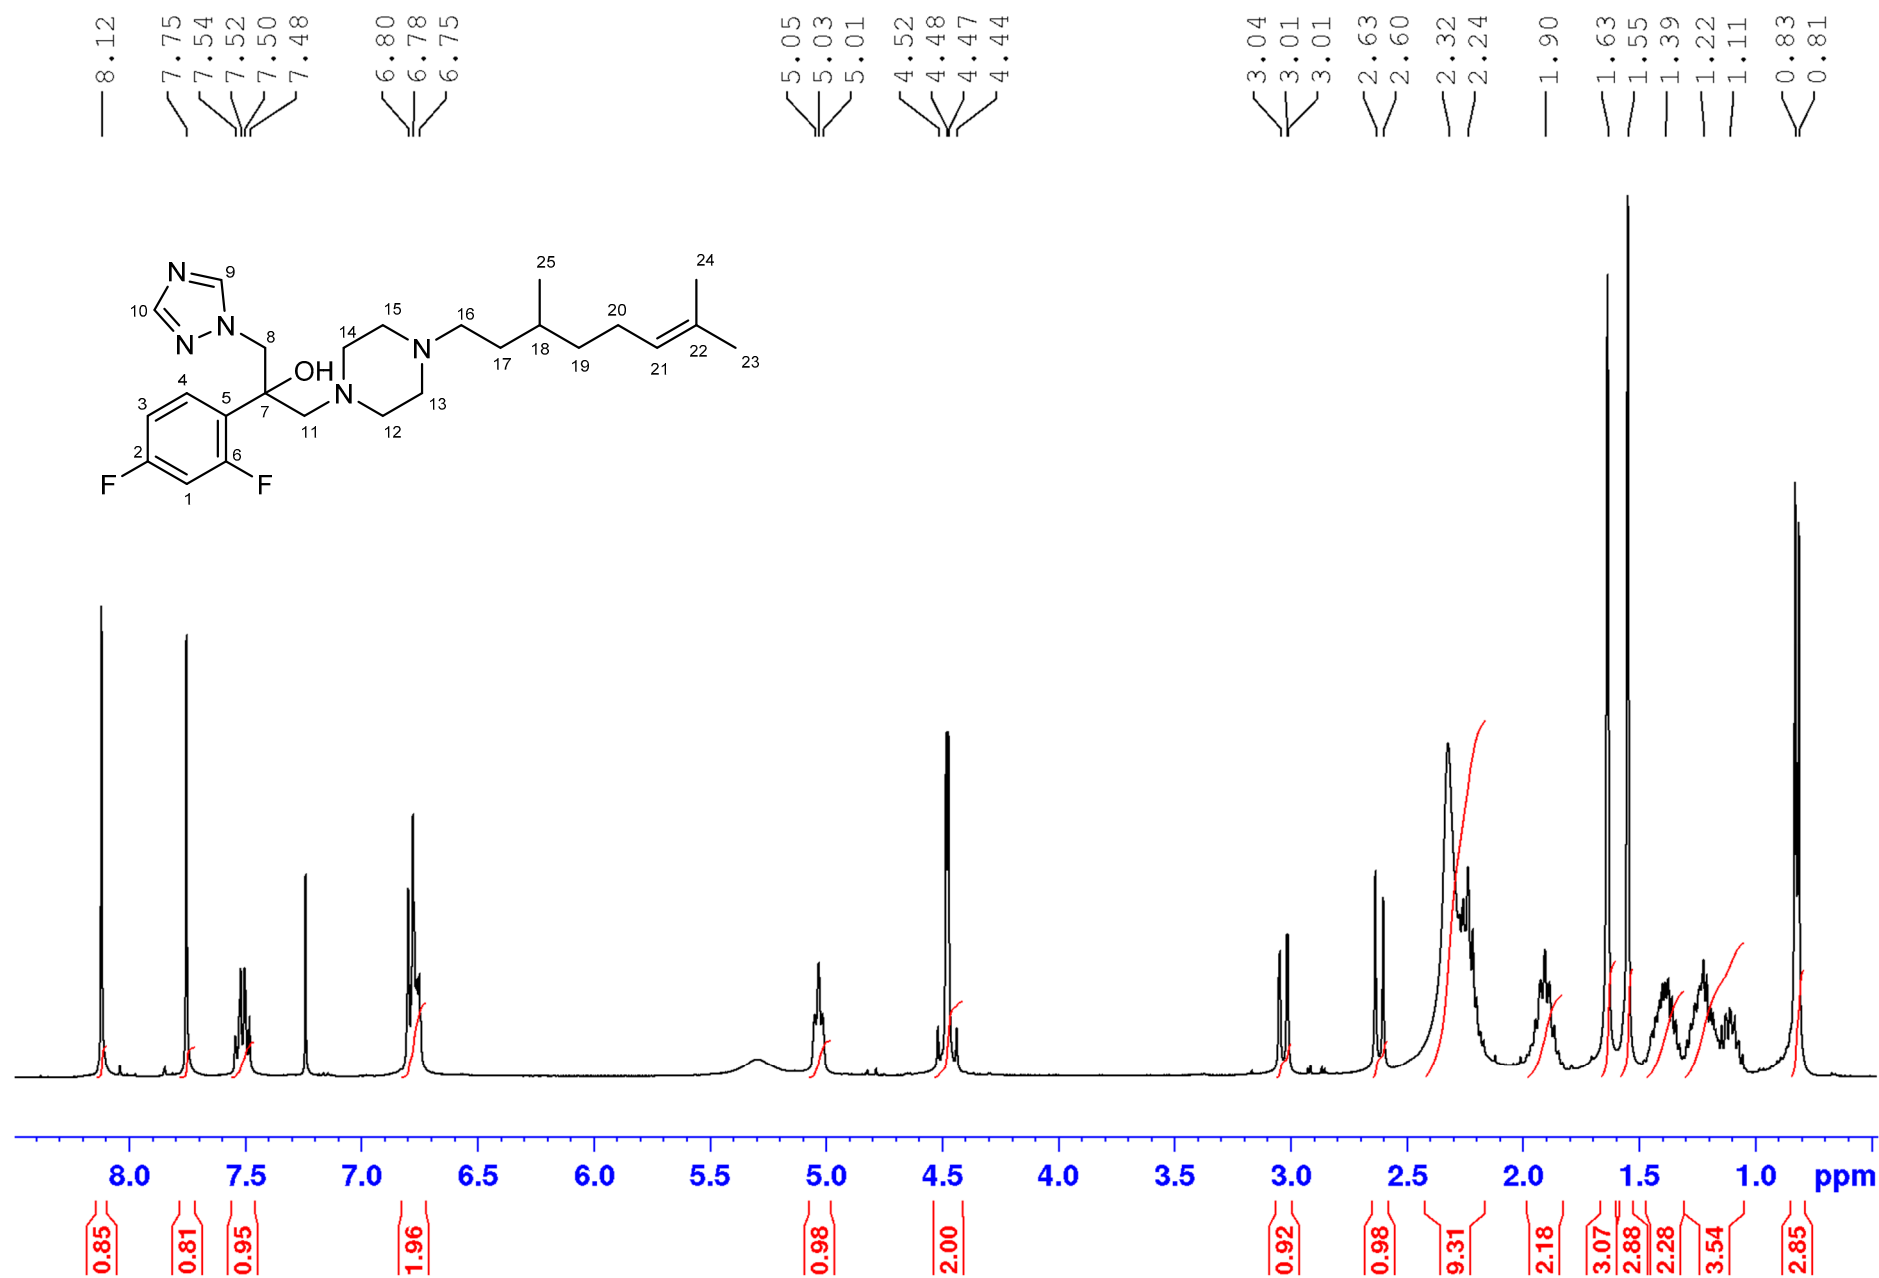

**Figure S19.**  $^1\text{H}$ -NMR spectroscopic data for compound **10f**.

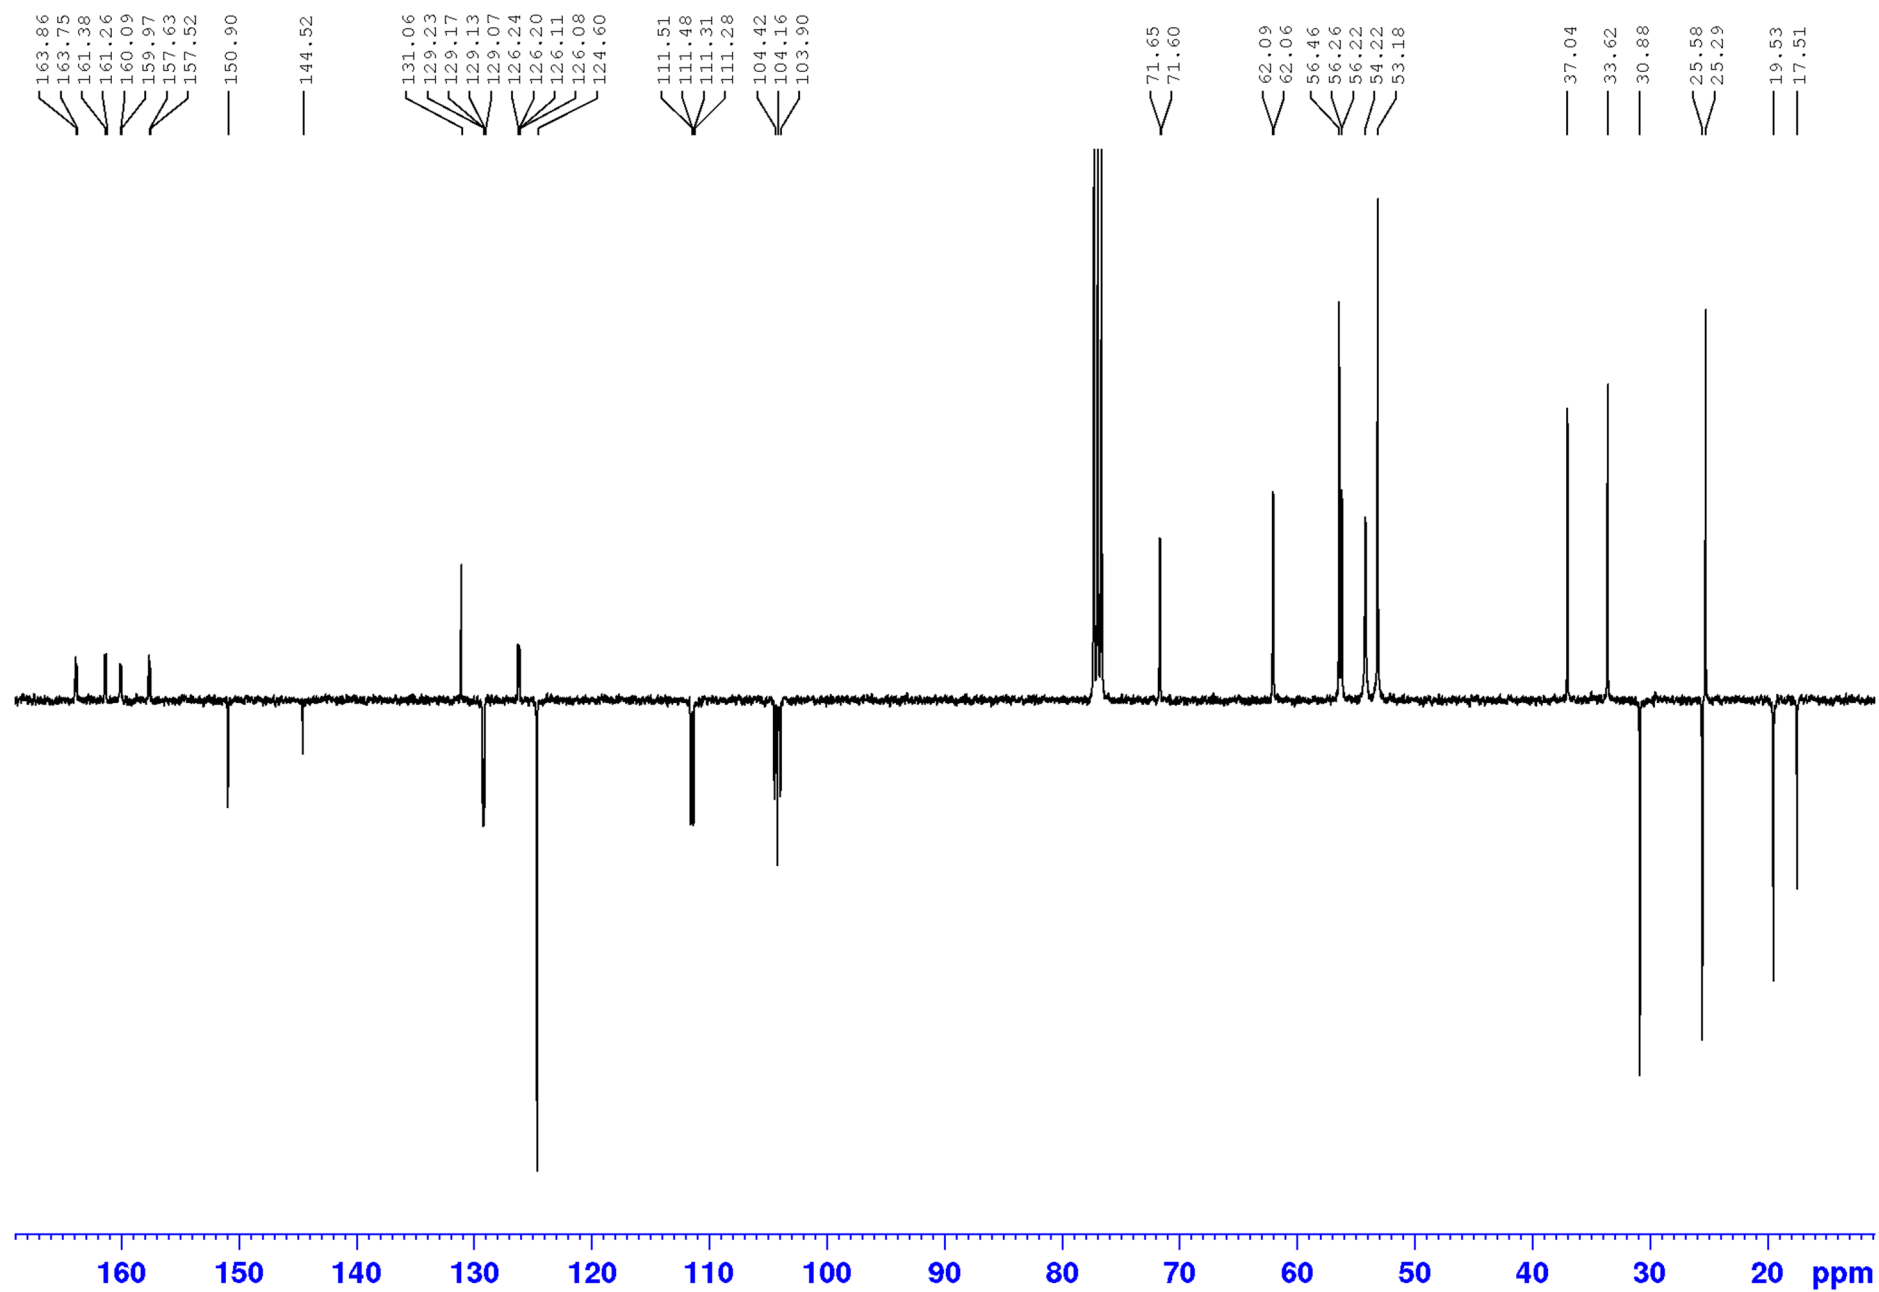

**Figure S20.** <sup>13</sup>C-NMR spectroscopic data for compound **10f**.

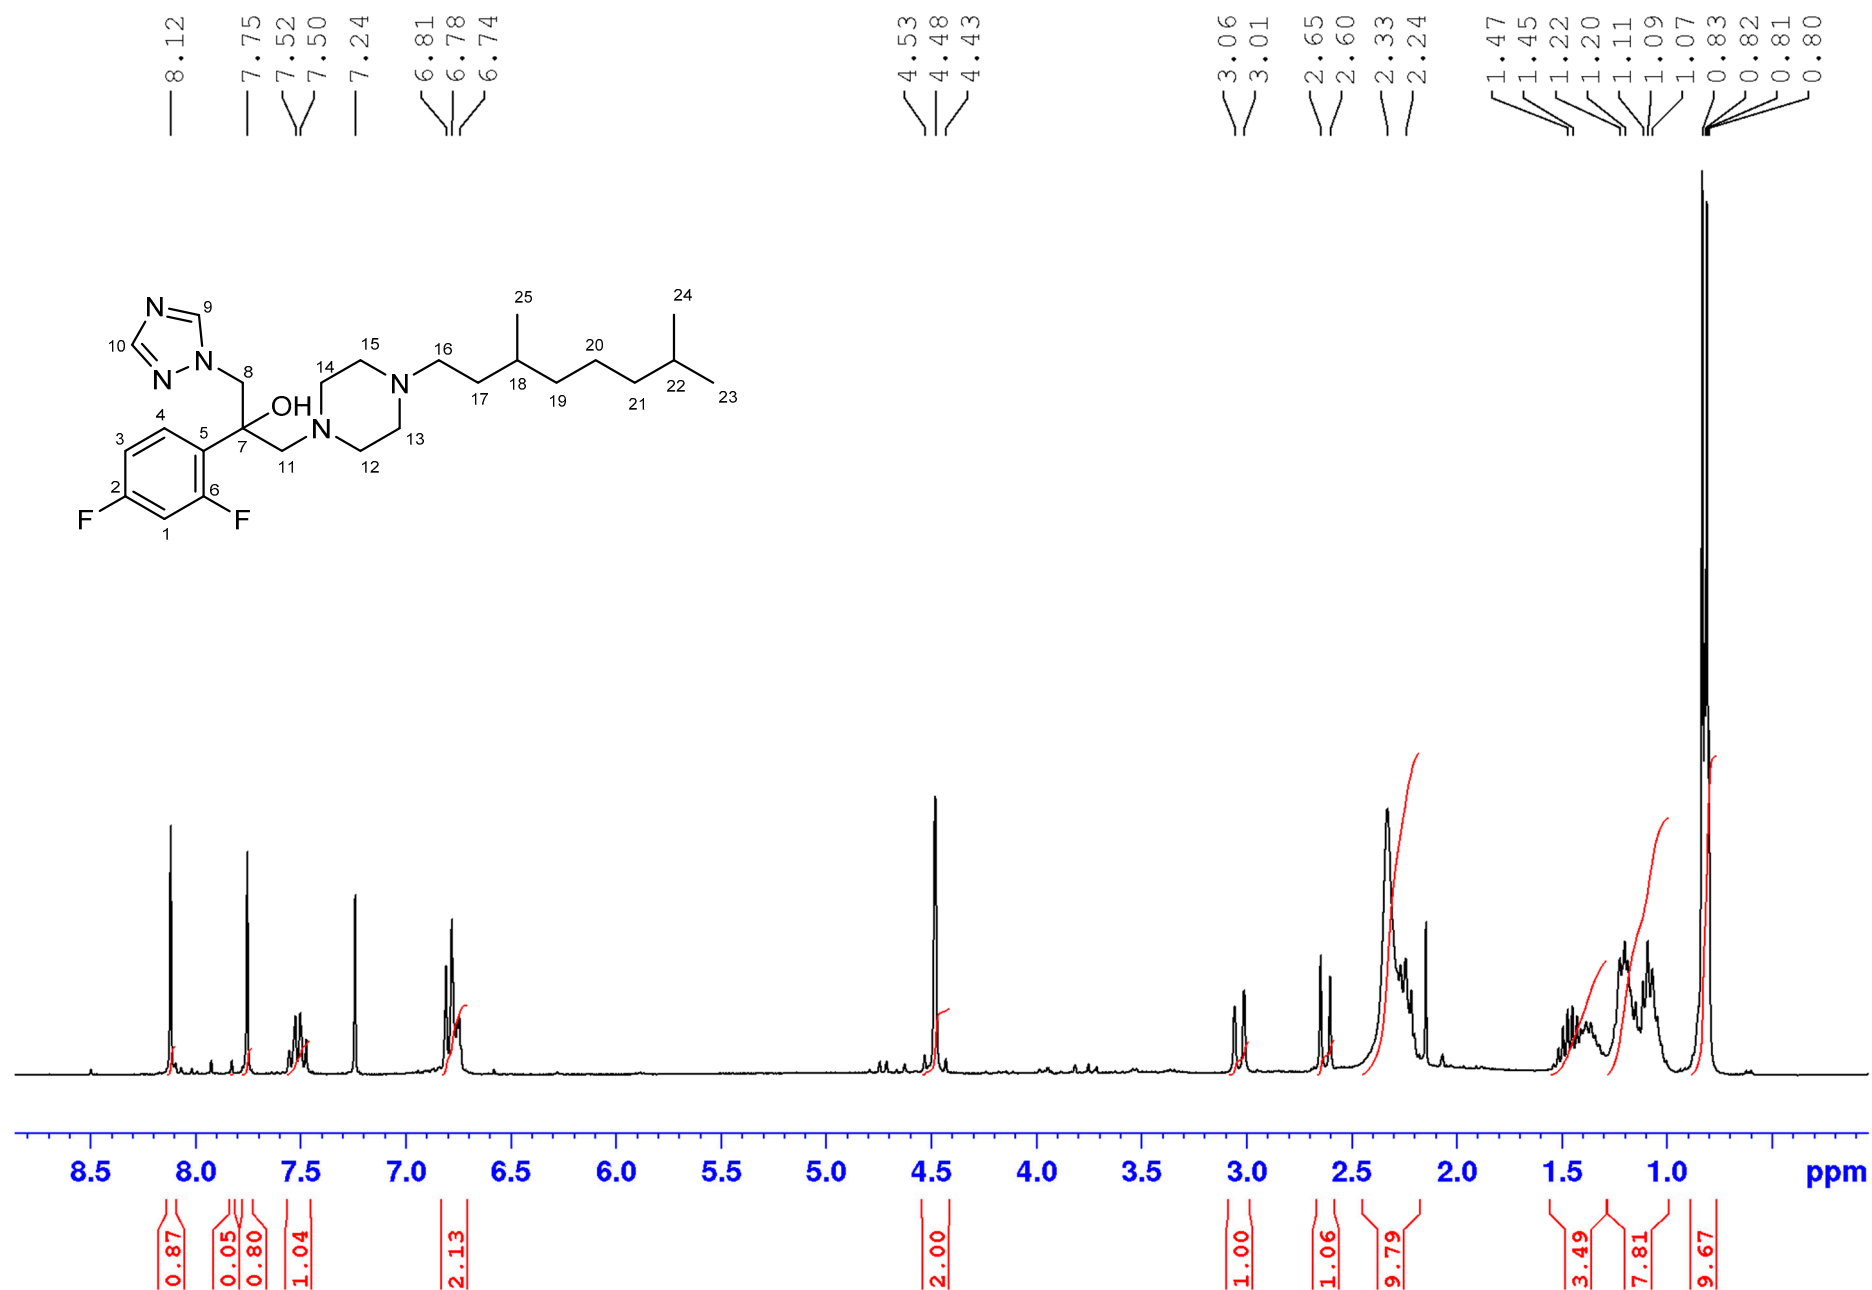

**Figure S21.** <sup>1</sup>H-NMR spectroscopic data for compound **10g**.

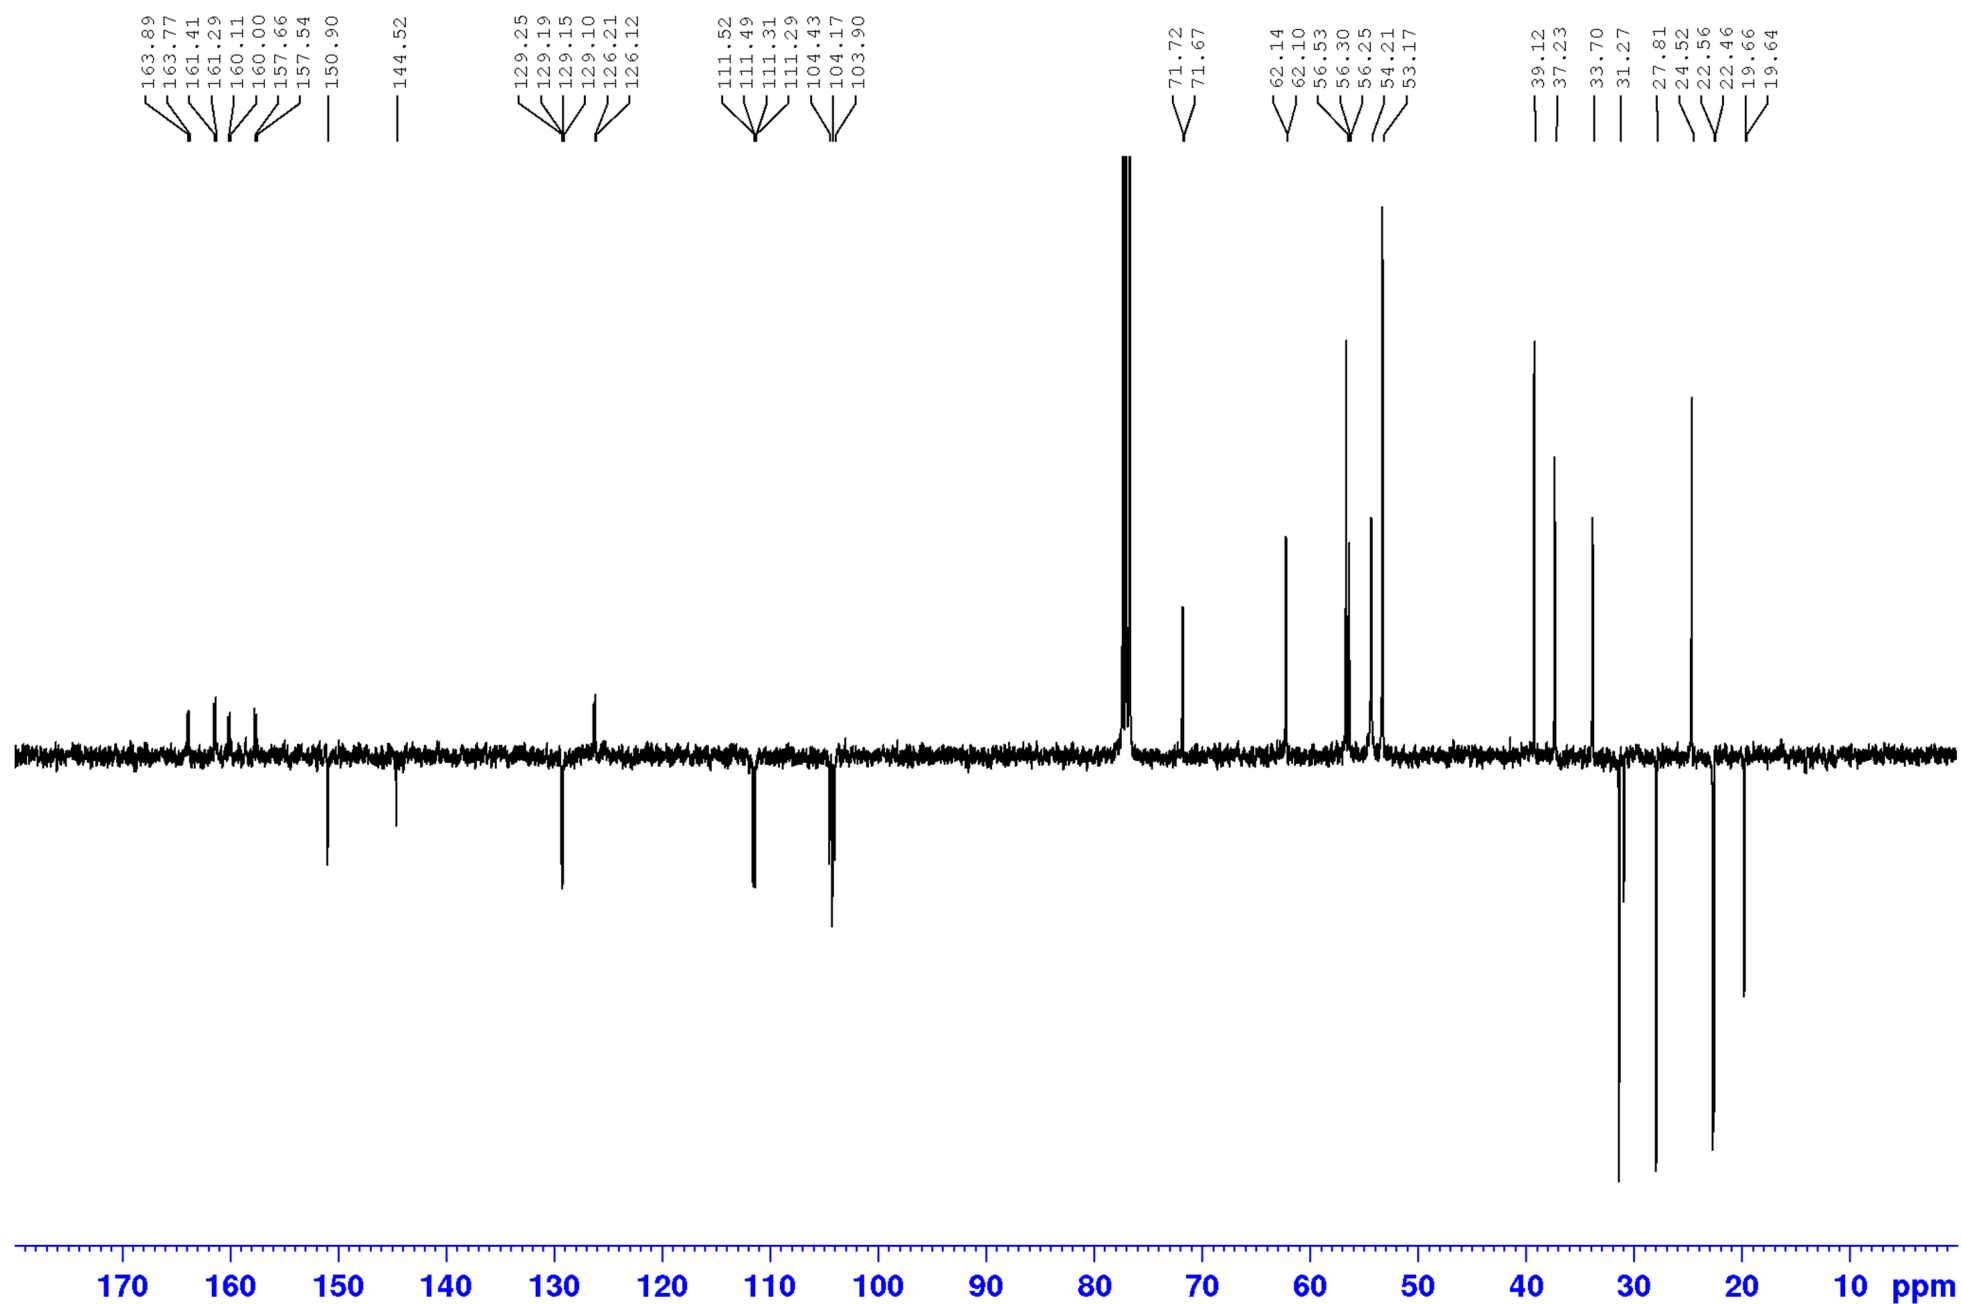

Figure S22. <sup>13</sup>C-NMR spectroscopic data for compound **10g**.

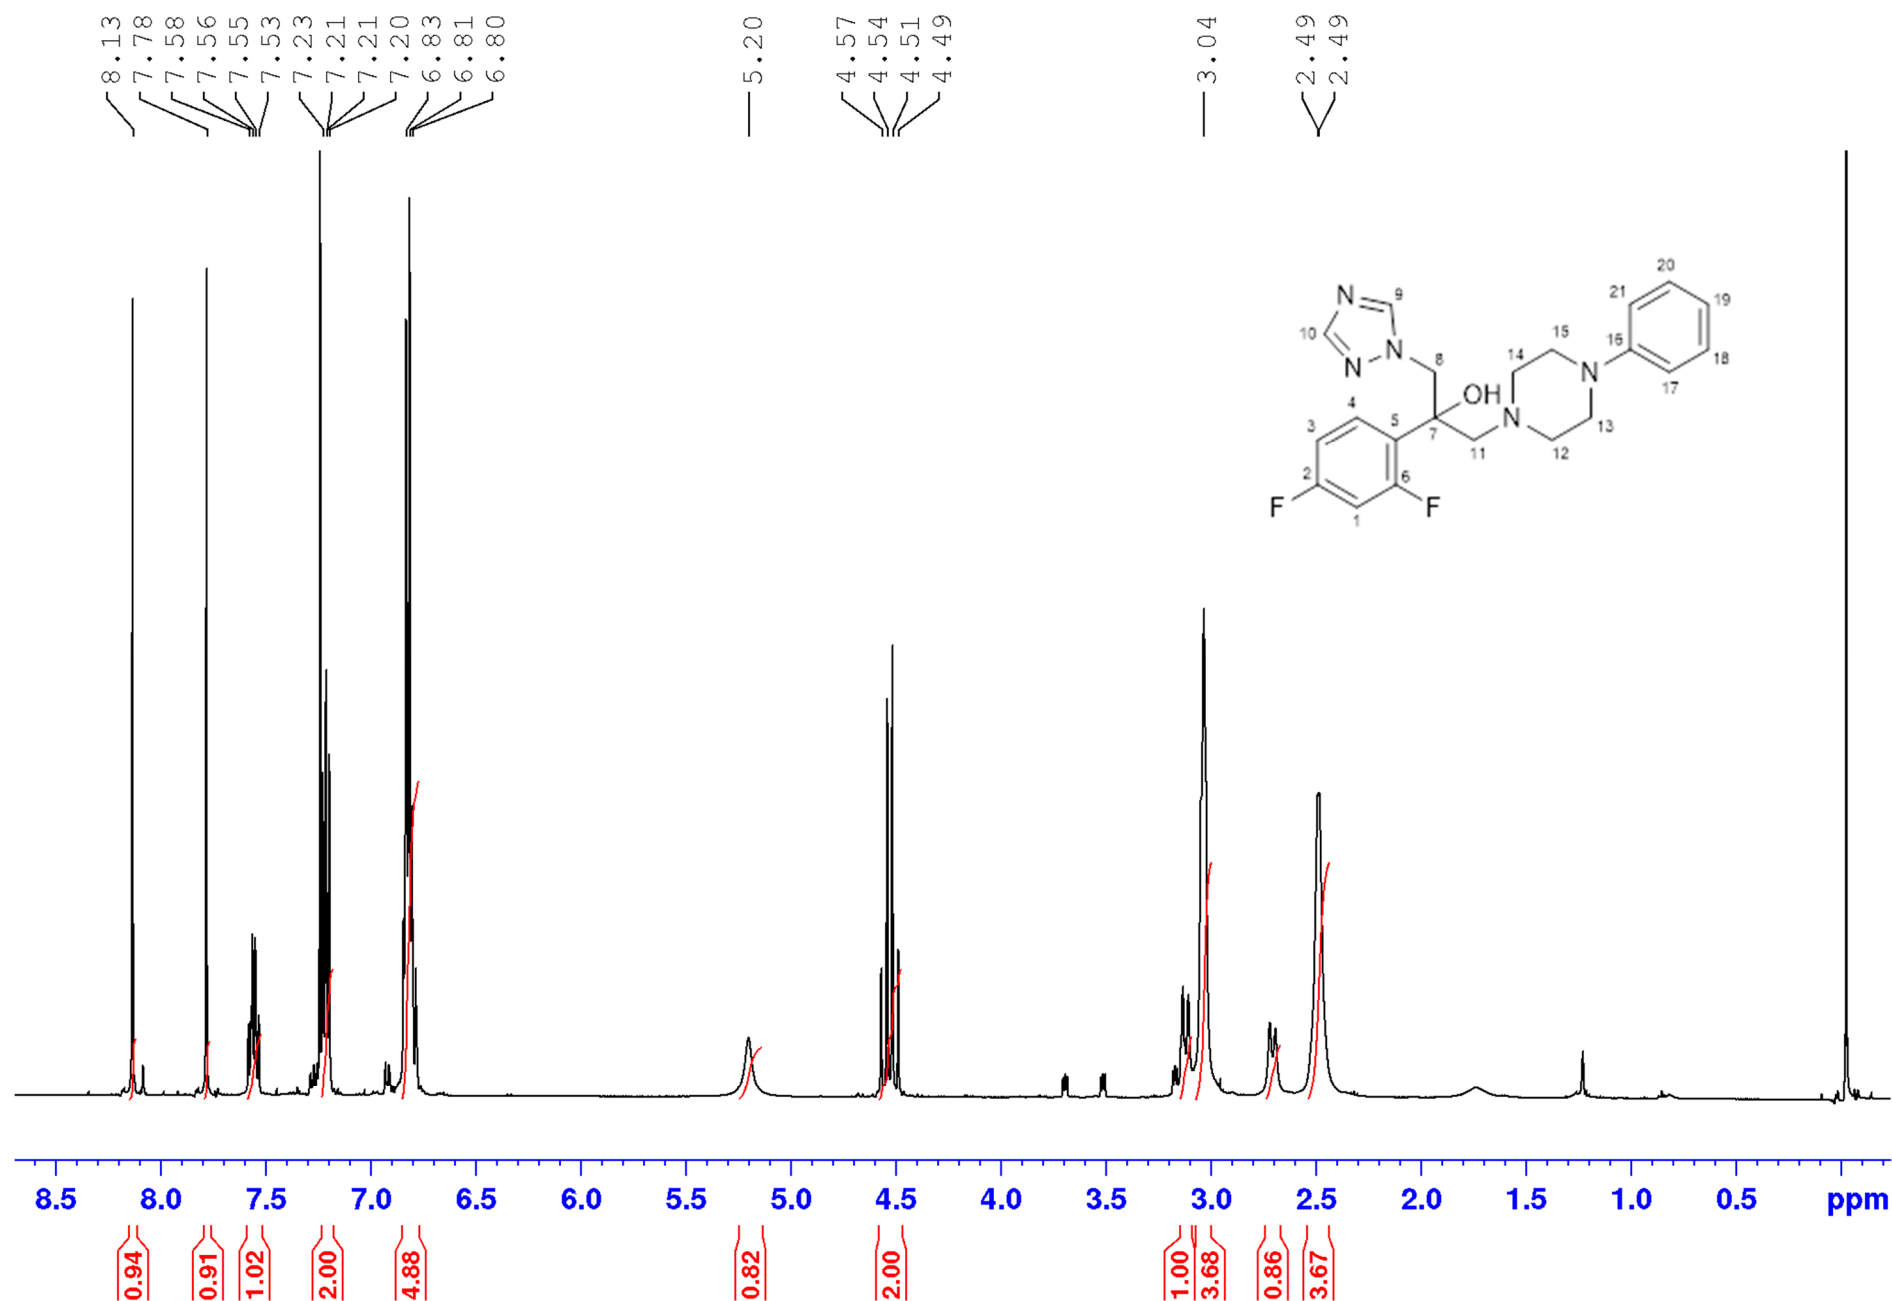

**Figure S23.** <sup>1</sup>H-NMR spectroscopic data for compound **10h**.



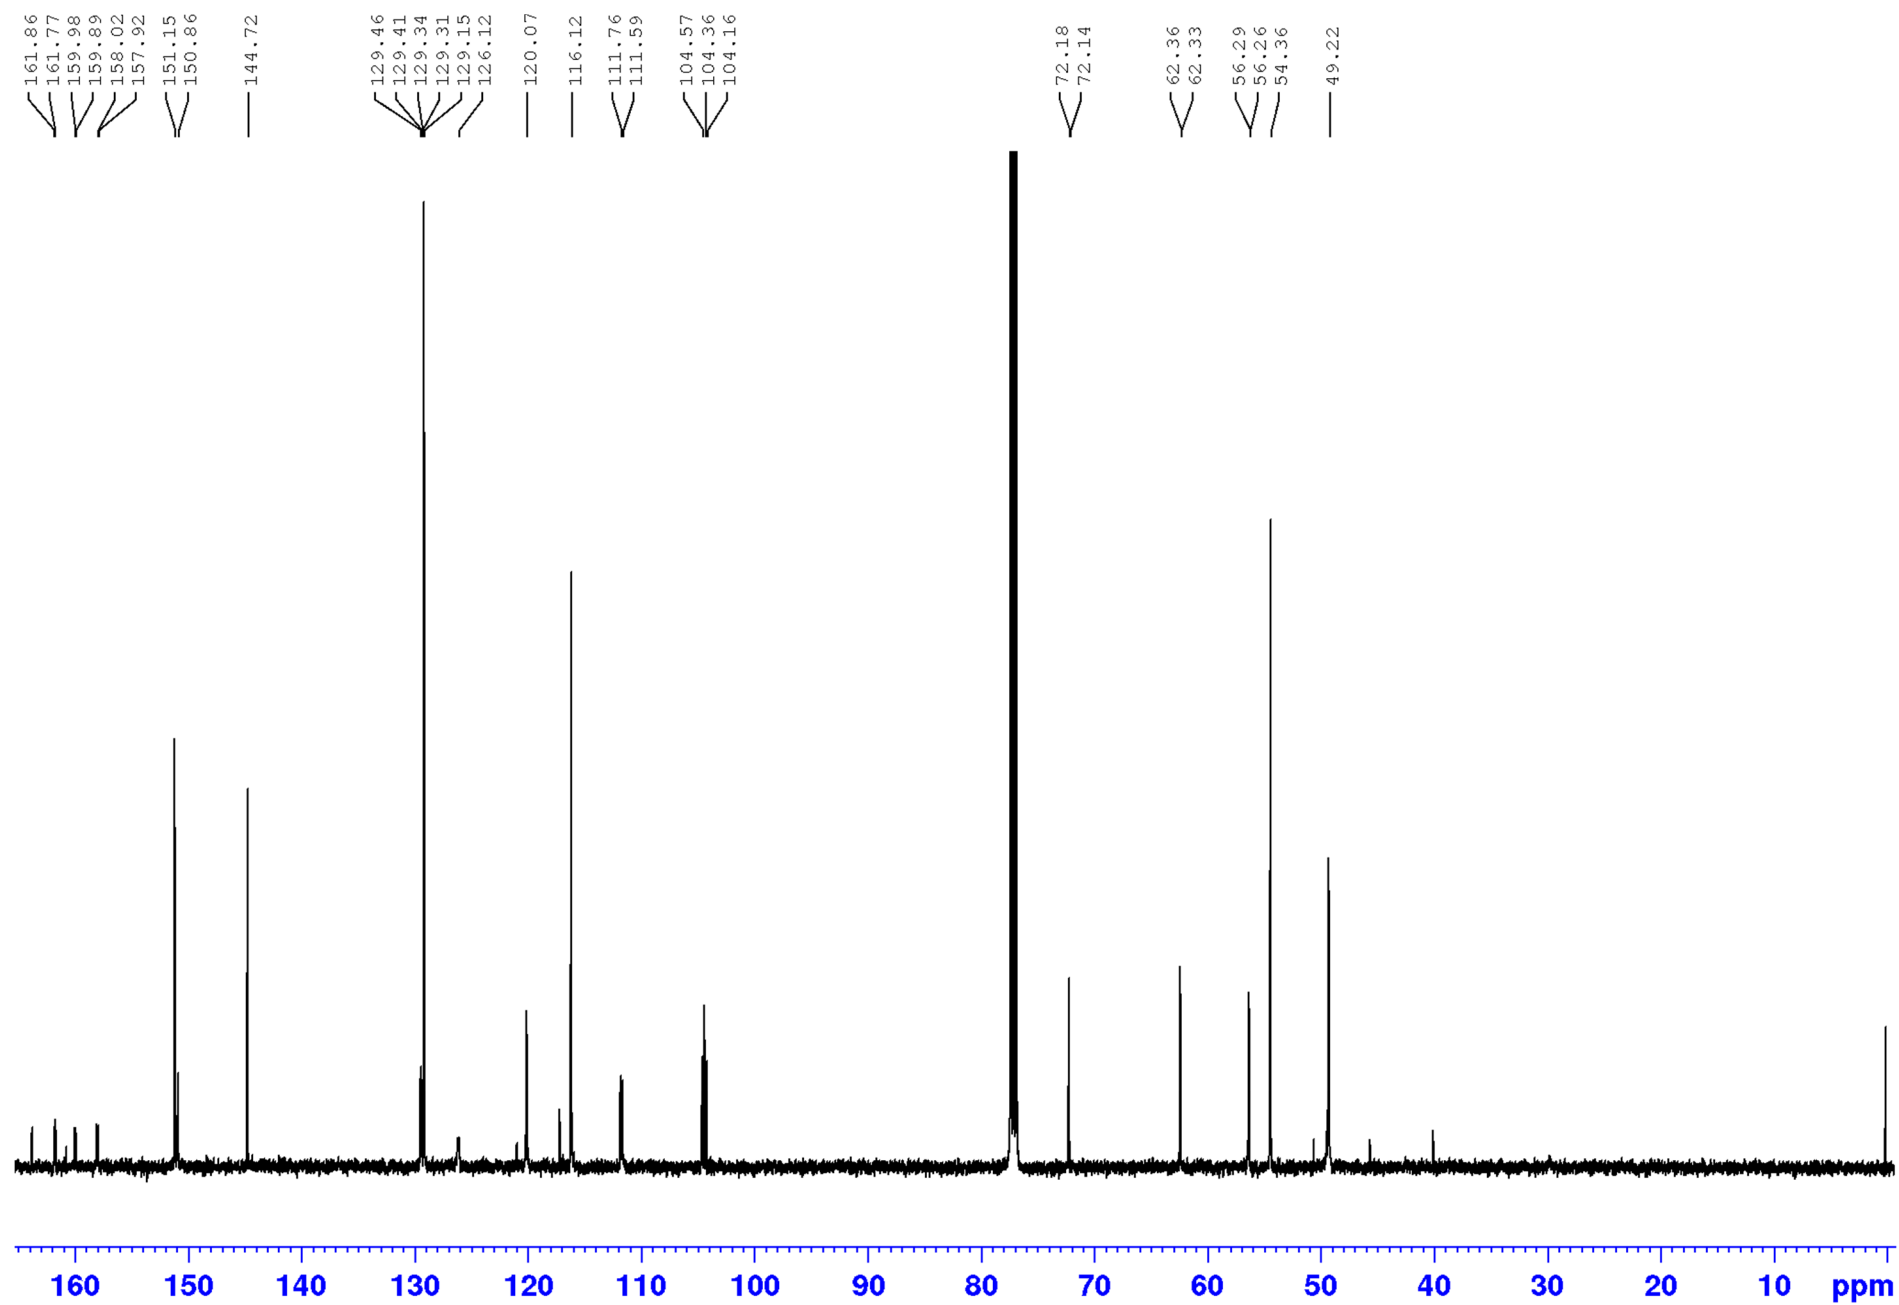

Figure S24. <sup>13</sup>C-NMR spectroscopic data for compound 10h.

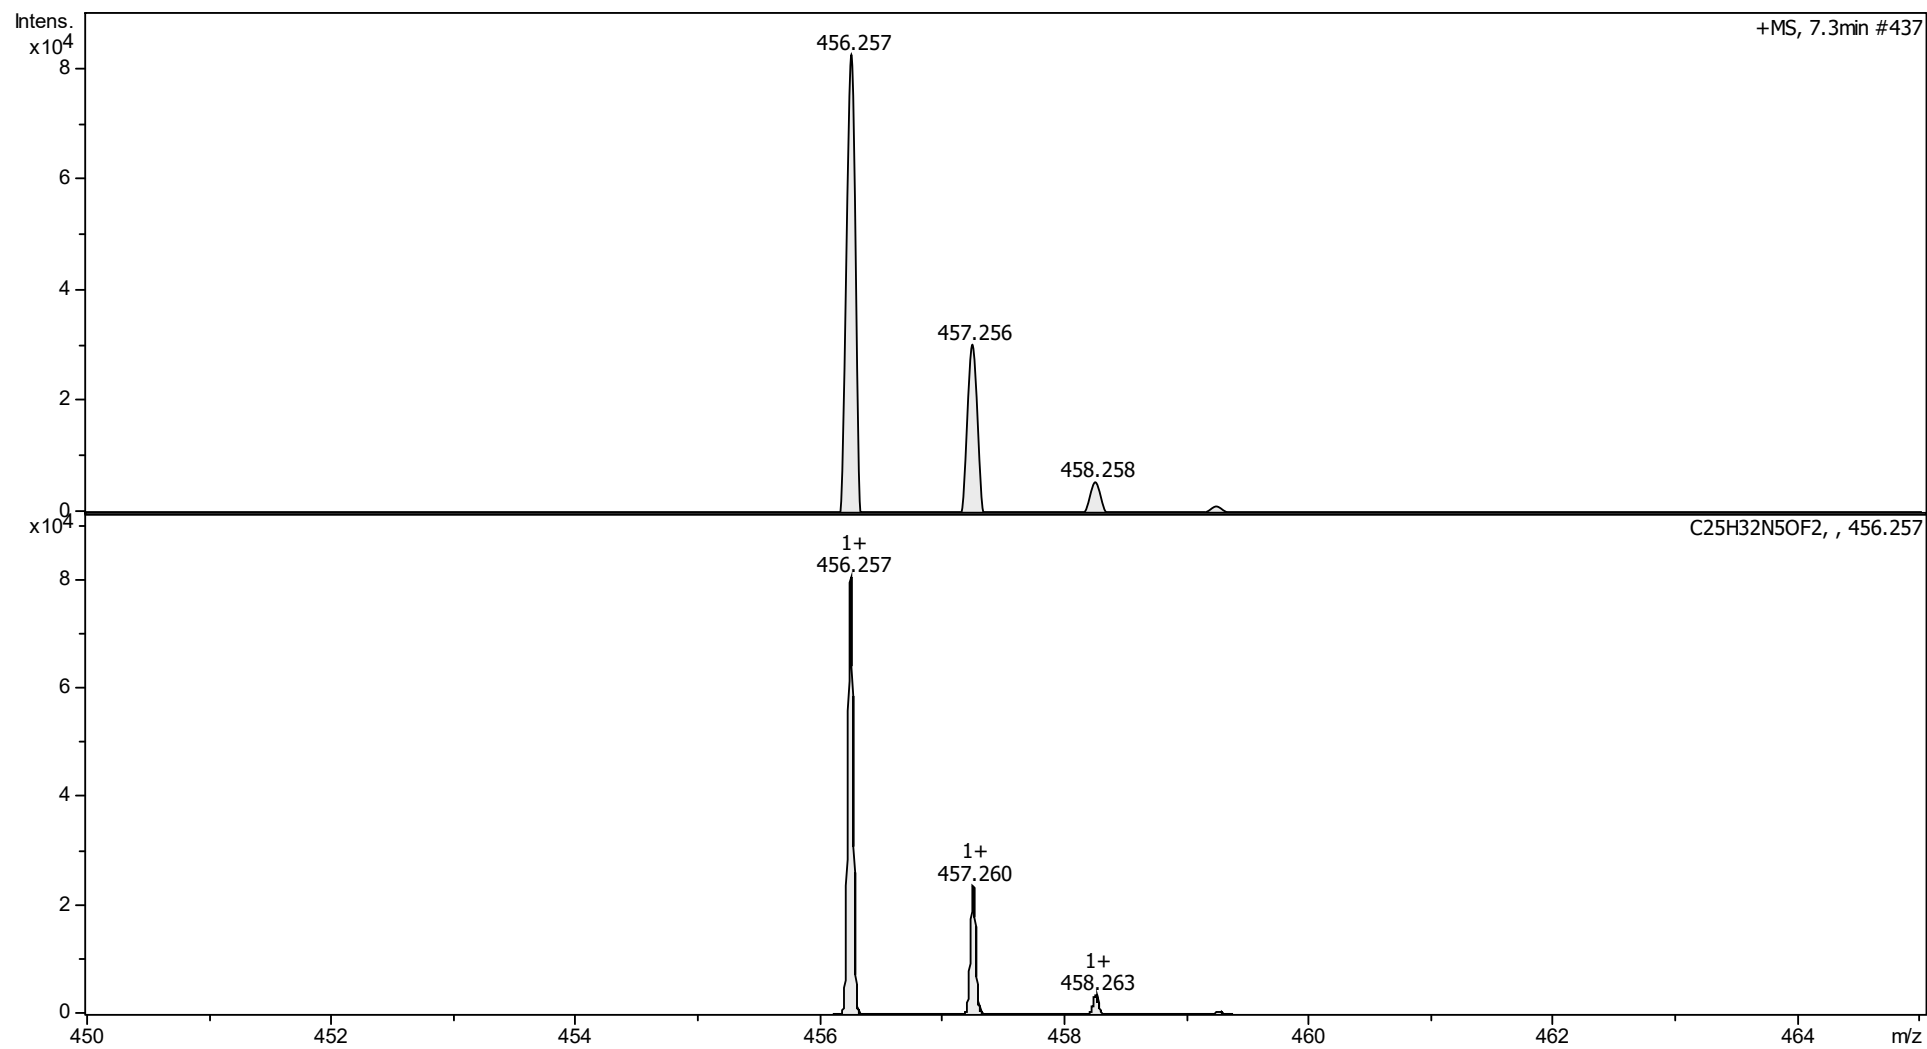

**Figure S25.** HRMS of the compound **10a** with simulation  $C_{25}H_{32}N_5OF_2^+$ .

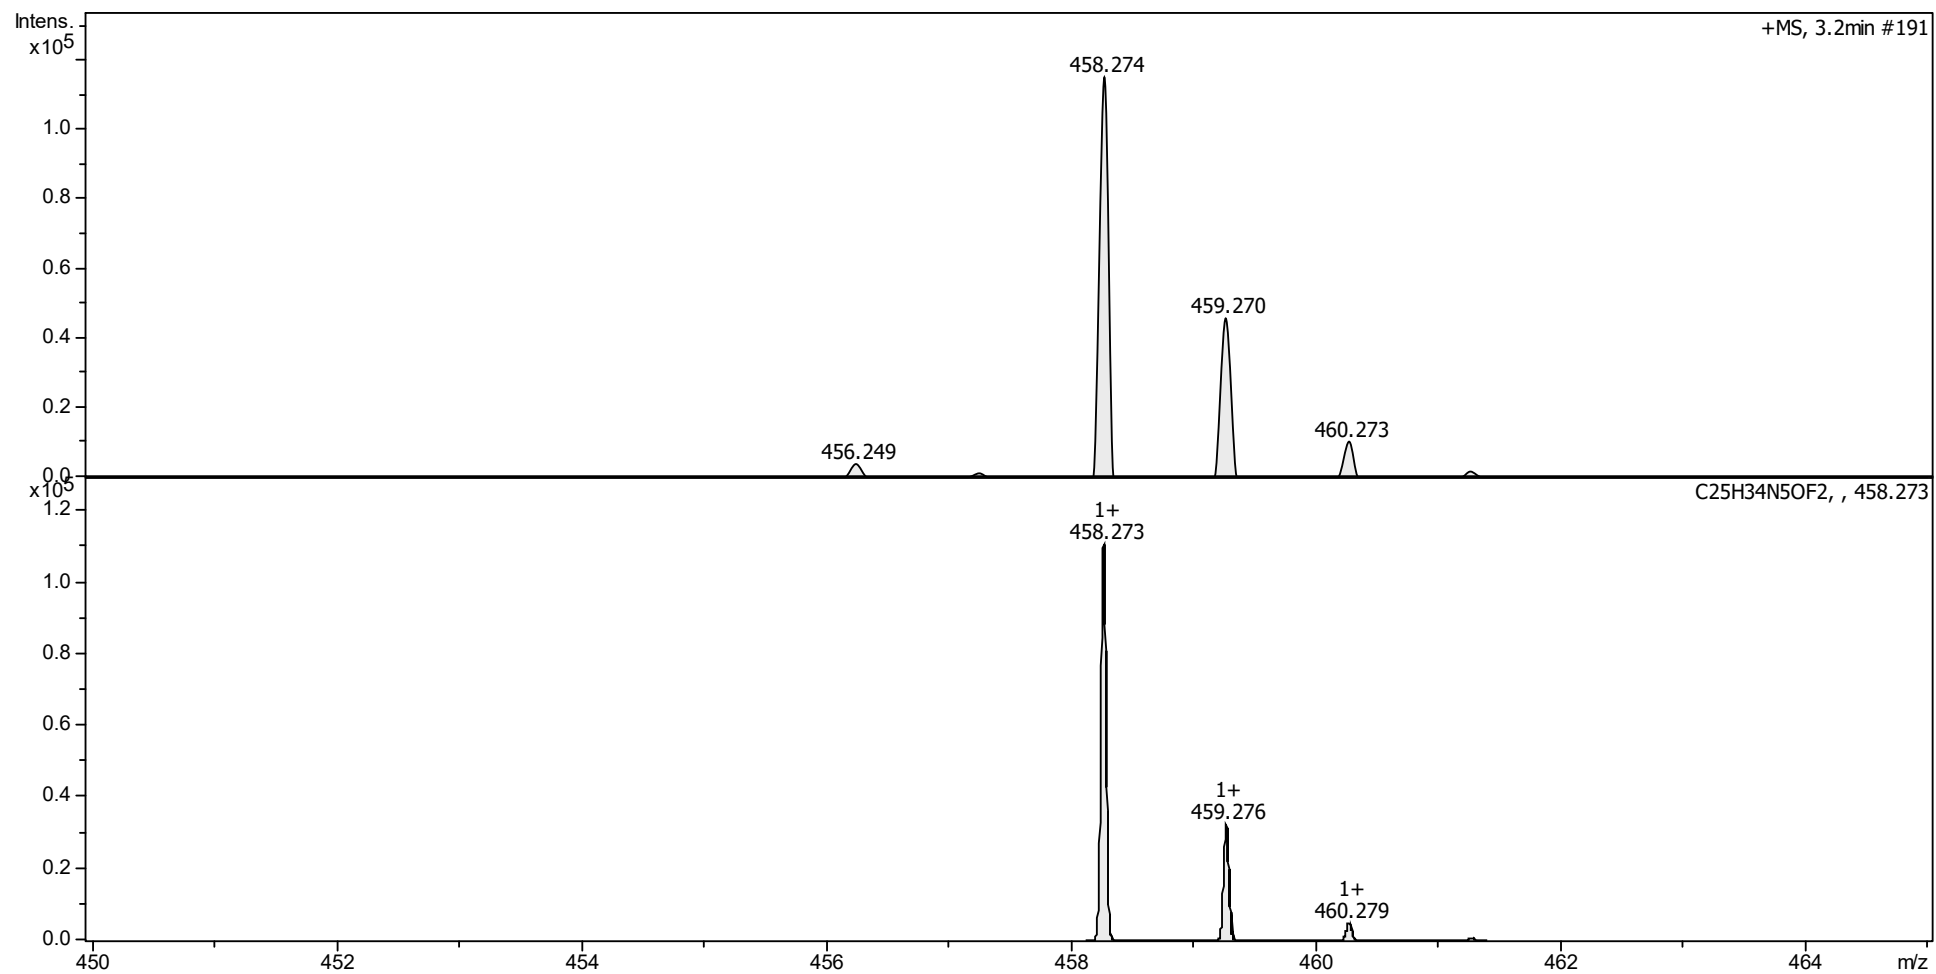

**Figure S26.** HRMS of the compound **10b** with simulation C<sub>25</sub>H<sub>34</sub>N<sub>5</sub>OF<sub>2</sub><sup>+</sup>.

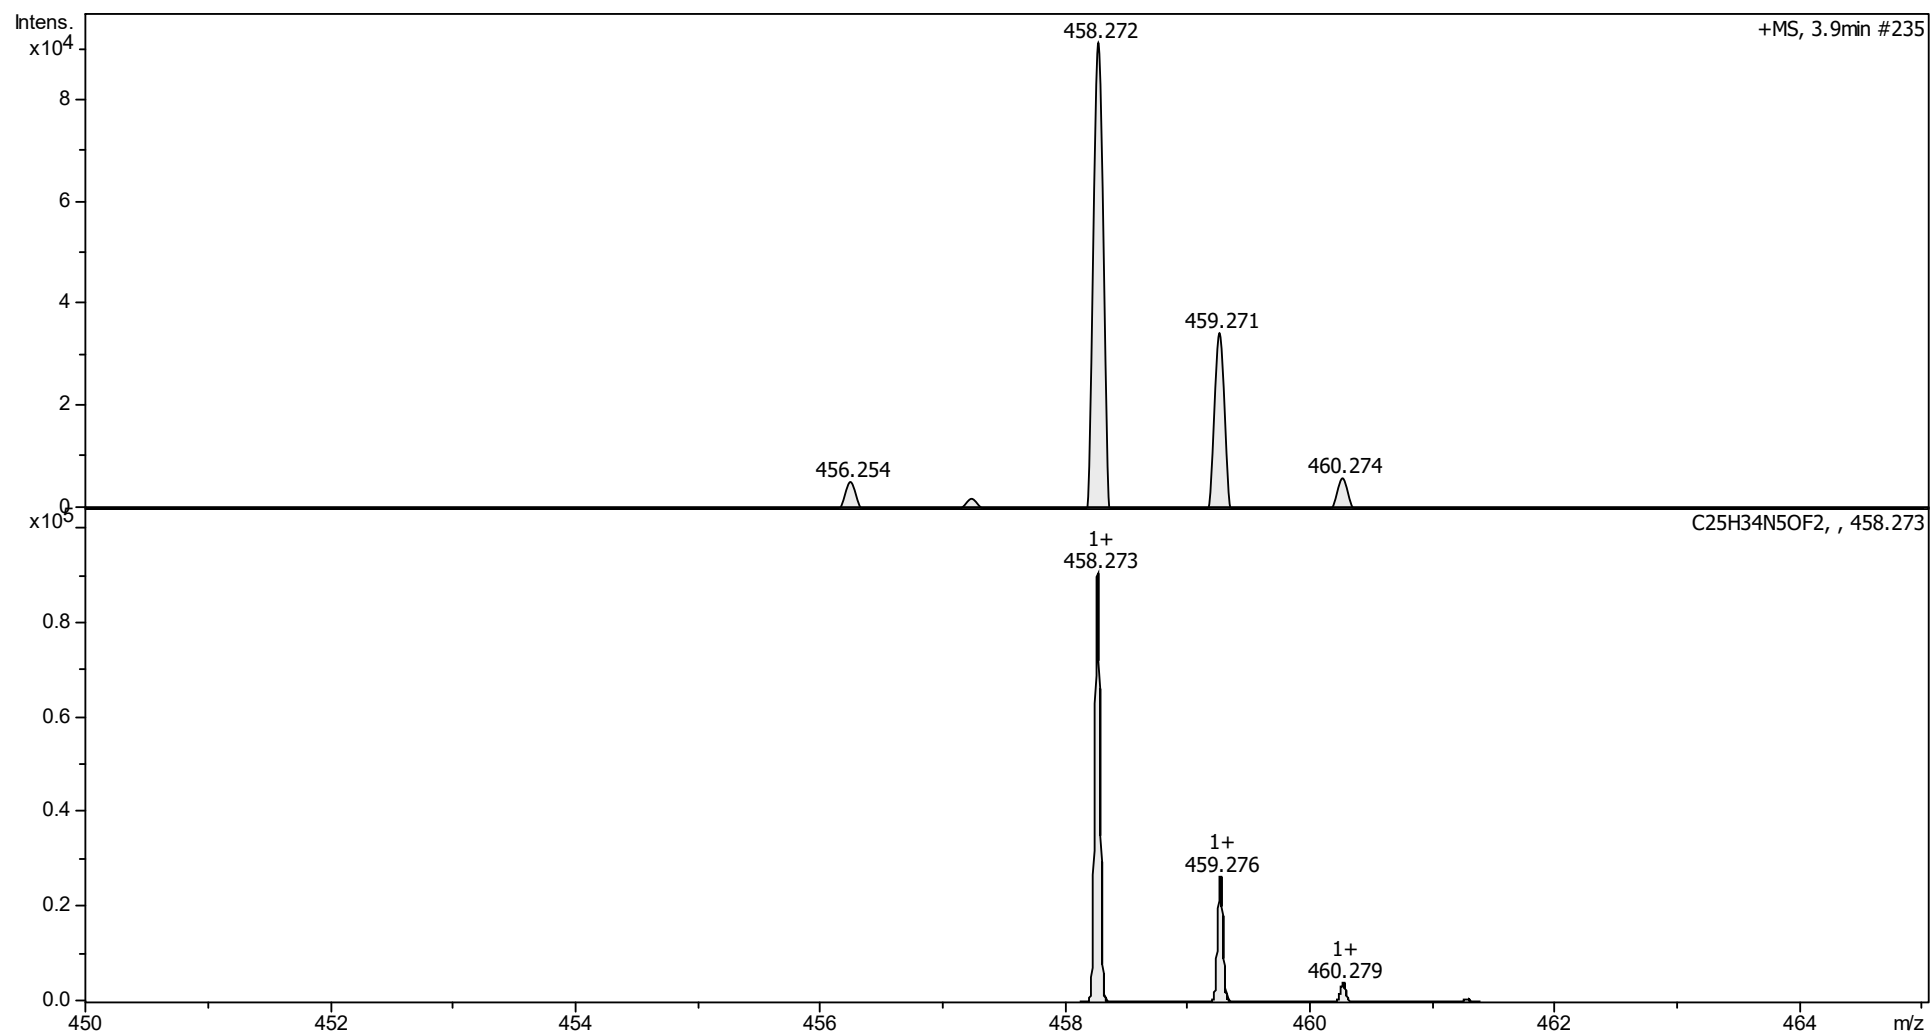

**Figure S27.** HRMS of the compound **10c** with simulation  $C_{25}H_{34}N_5OF_2^+$ .

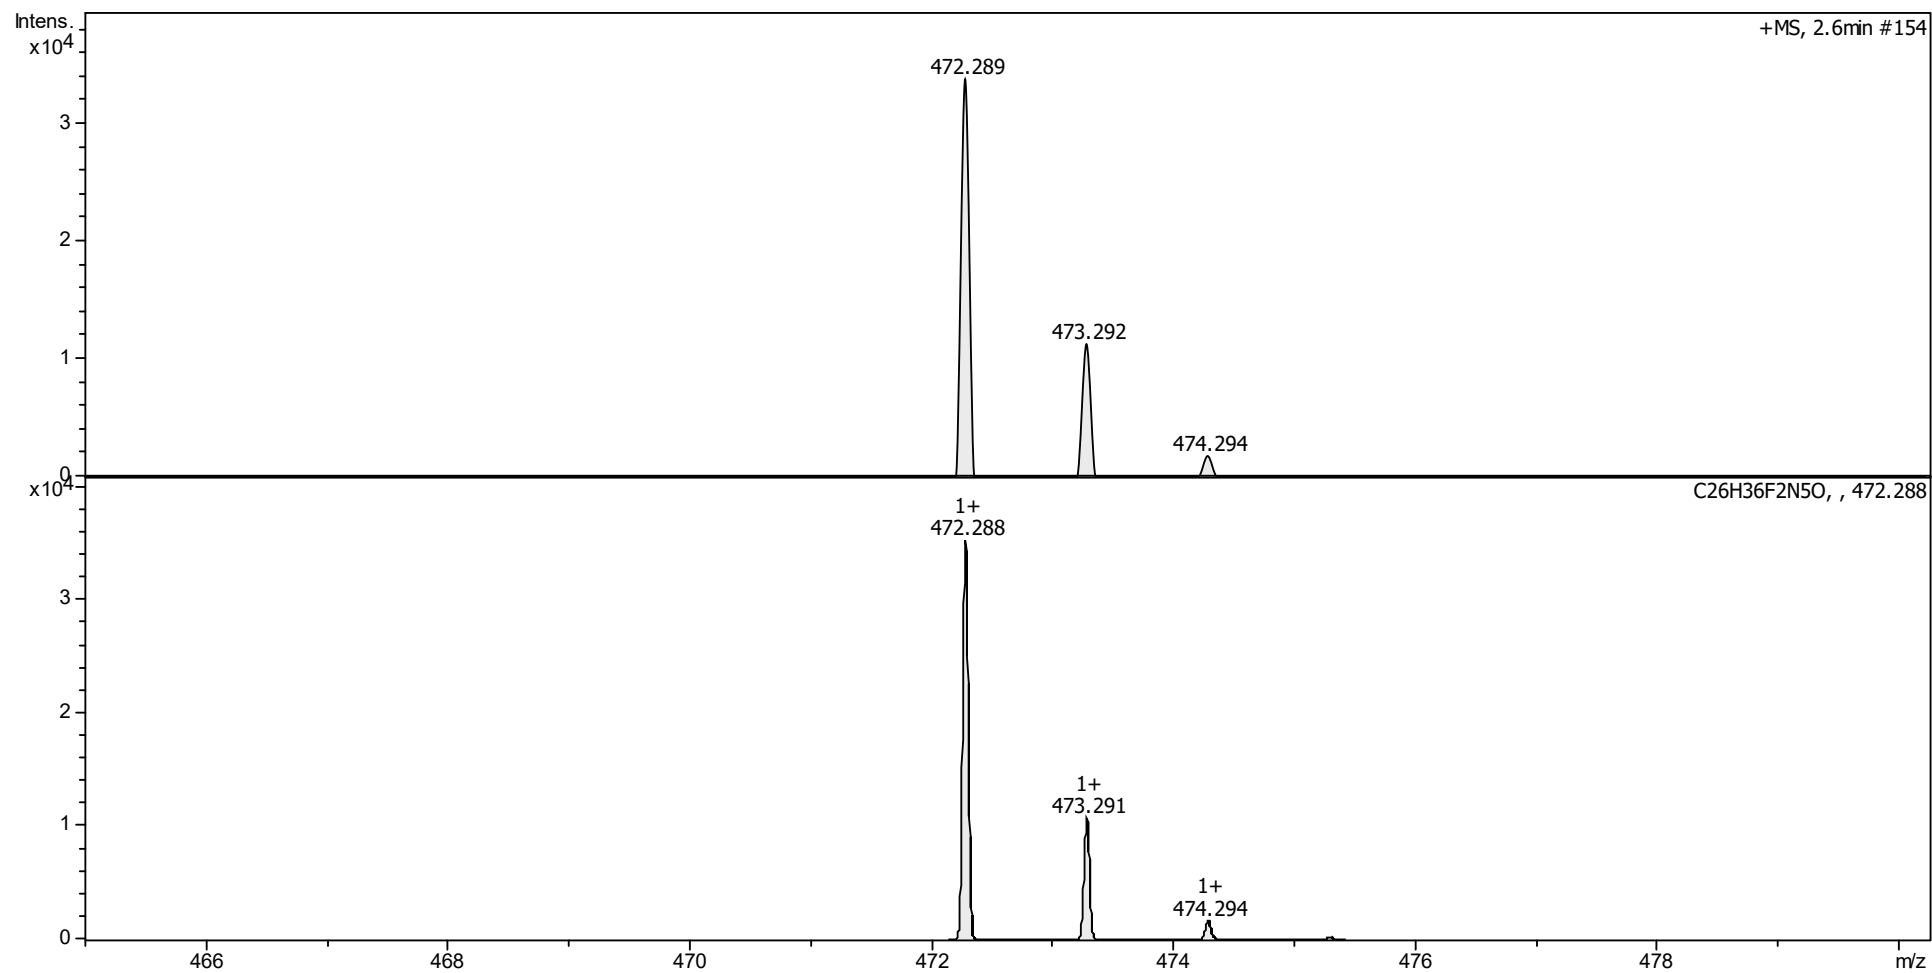

**Figure S28.** HRMS of the compound **10d** with simulation C<sub>26</sub>H<sub>36</sub>N<sub>5</sub>OF<sub>2</sub><sup>+</sup>.

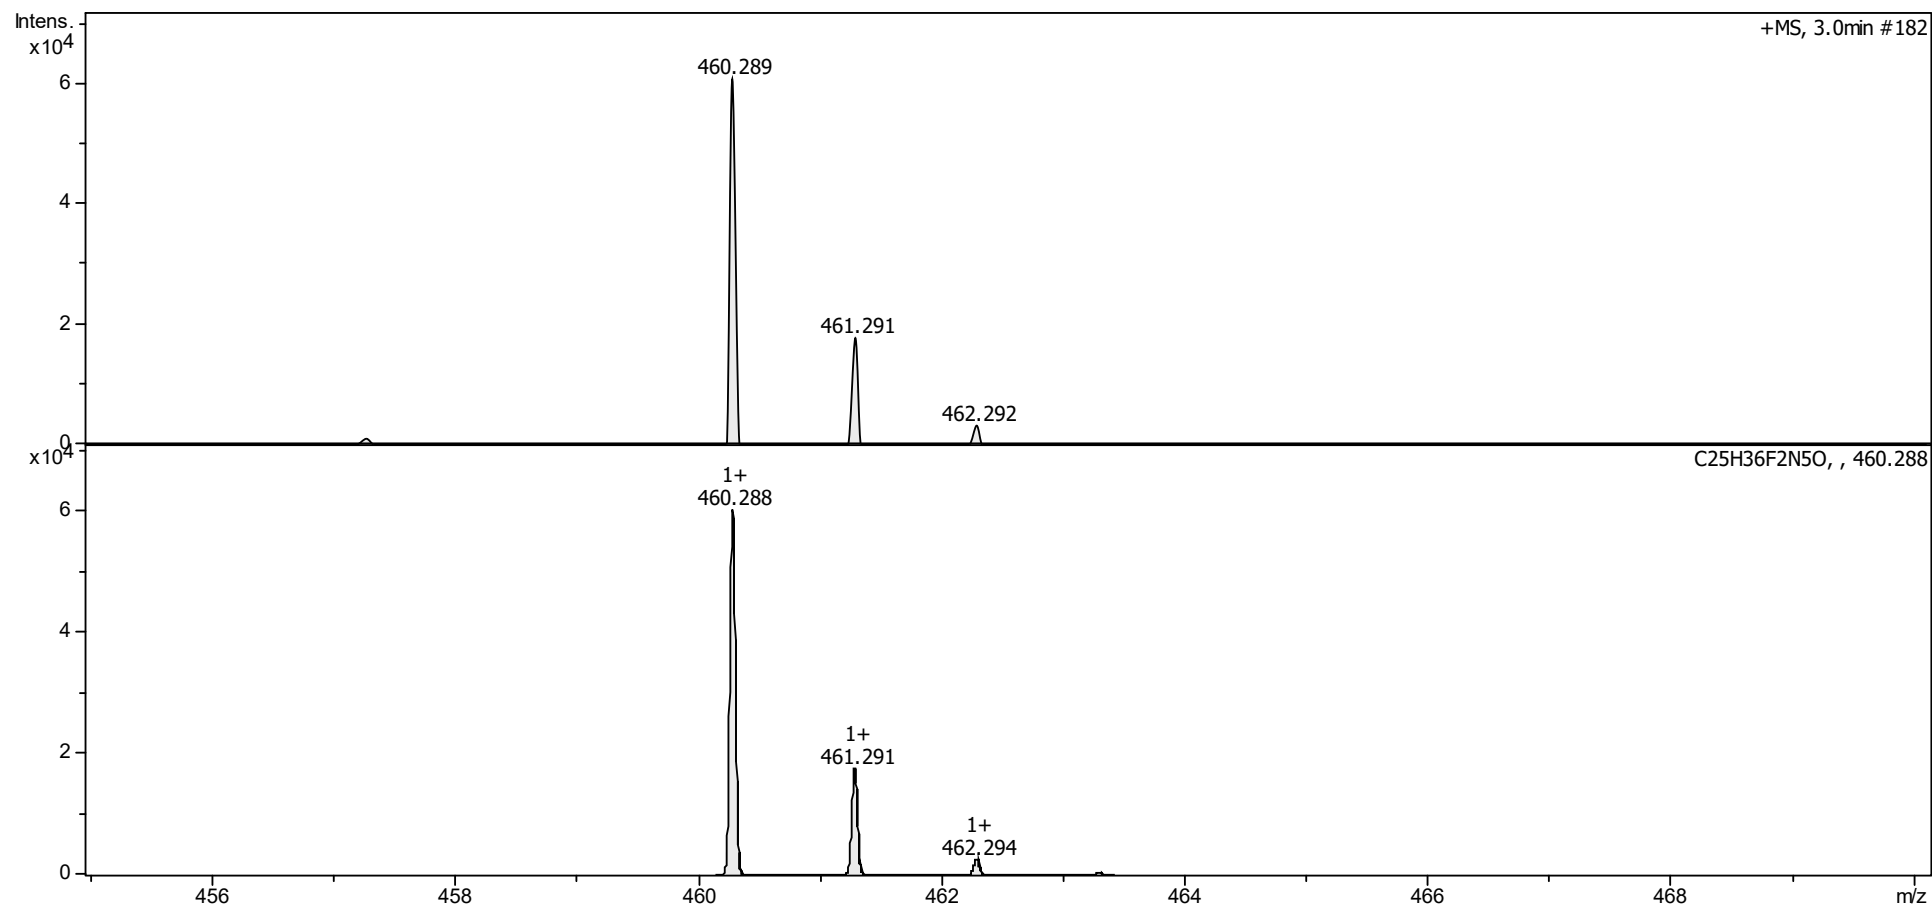

**Figure S29.** HRMS of the compound **10e** with simulation C<sub>25</sub>H<sub>36</sub>N<sub>5</sub>OF<sub>2</sub><sup>+</sup>.

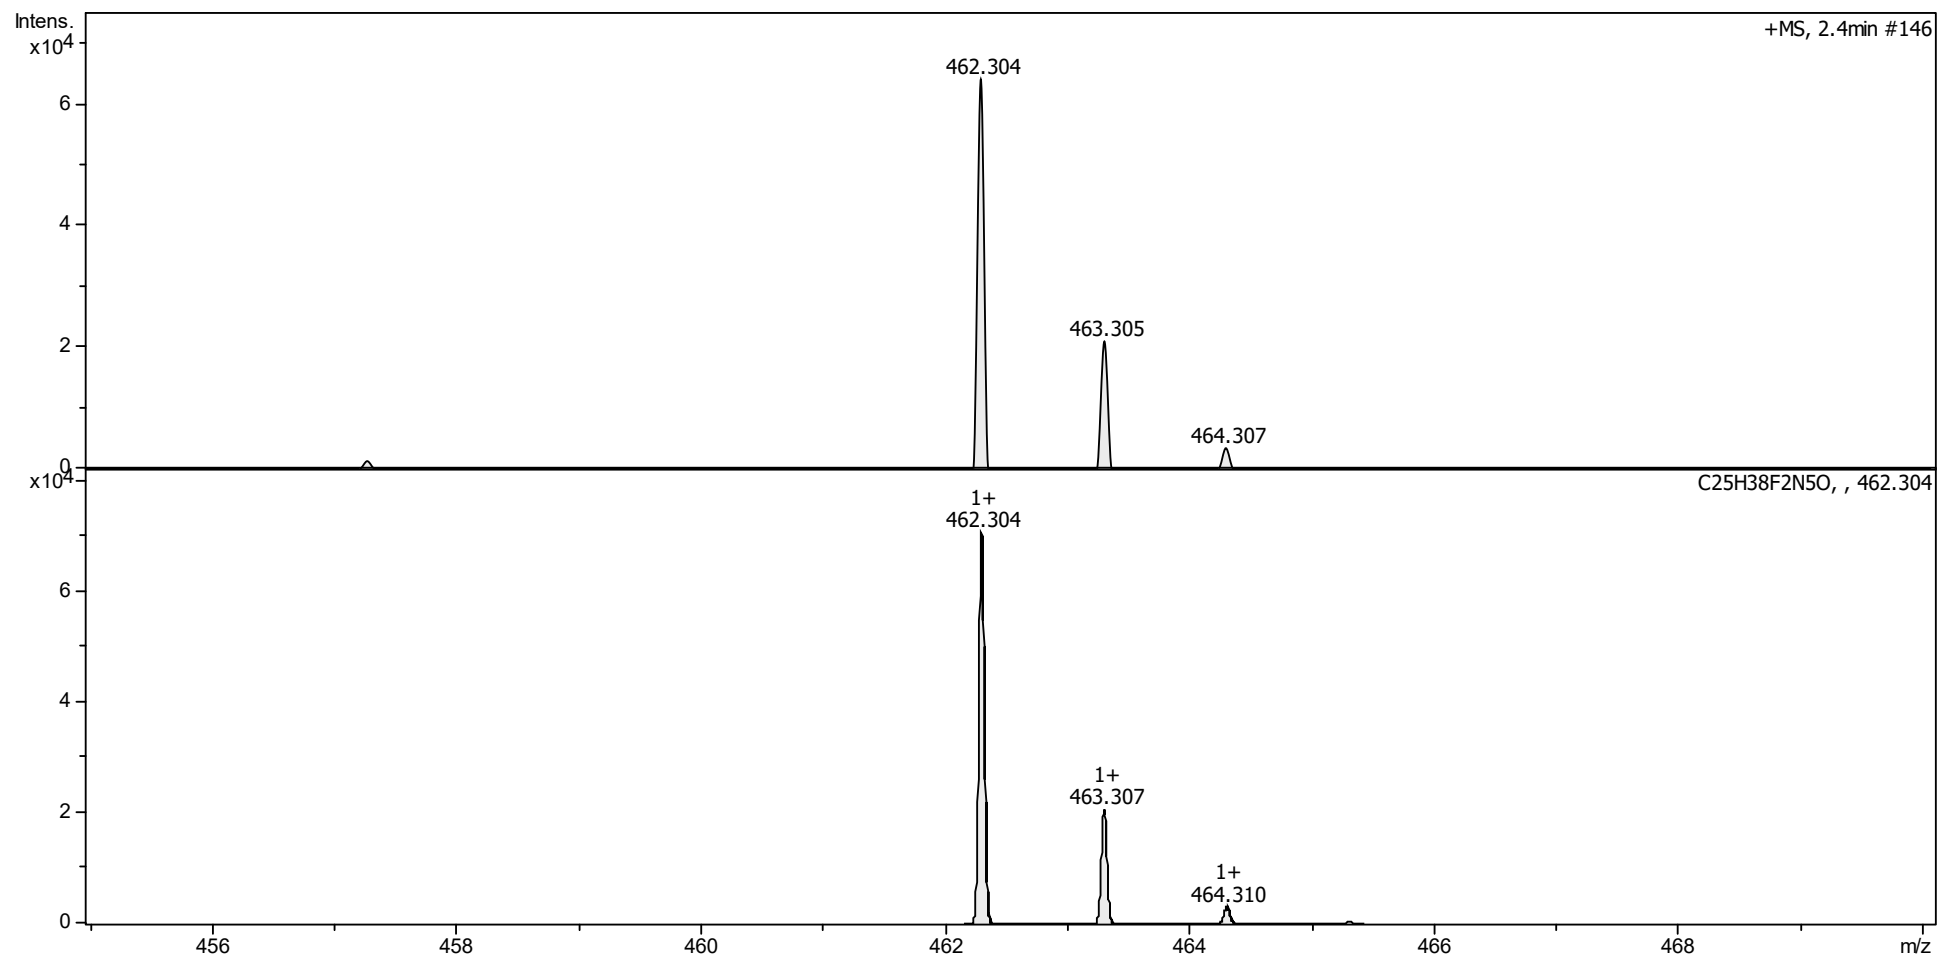

**Figure S30.** HRMS of the compound **10f** with simulation  $\text{C}_{25}\text{H}_{38}\text{N}_5\text{OF}_2^+$ .

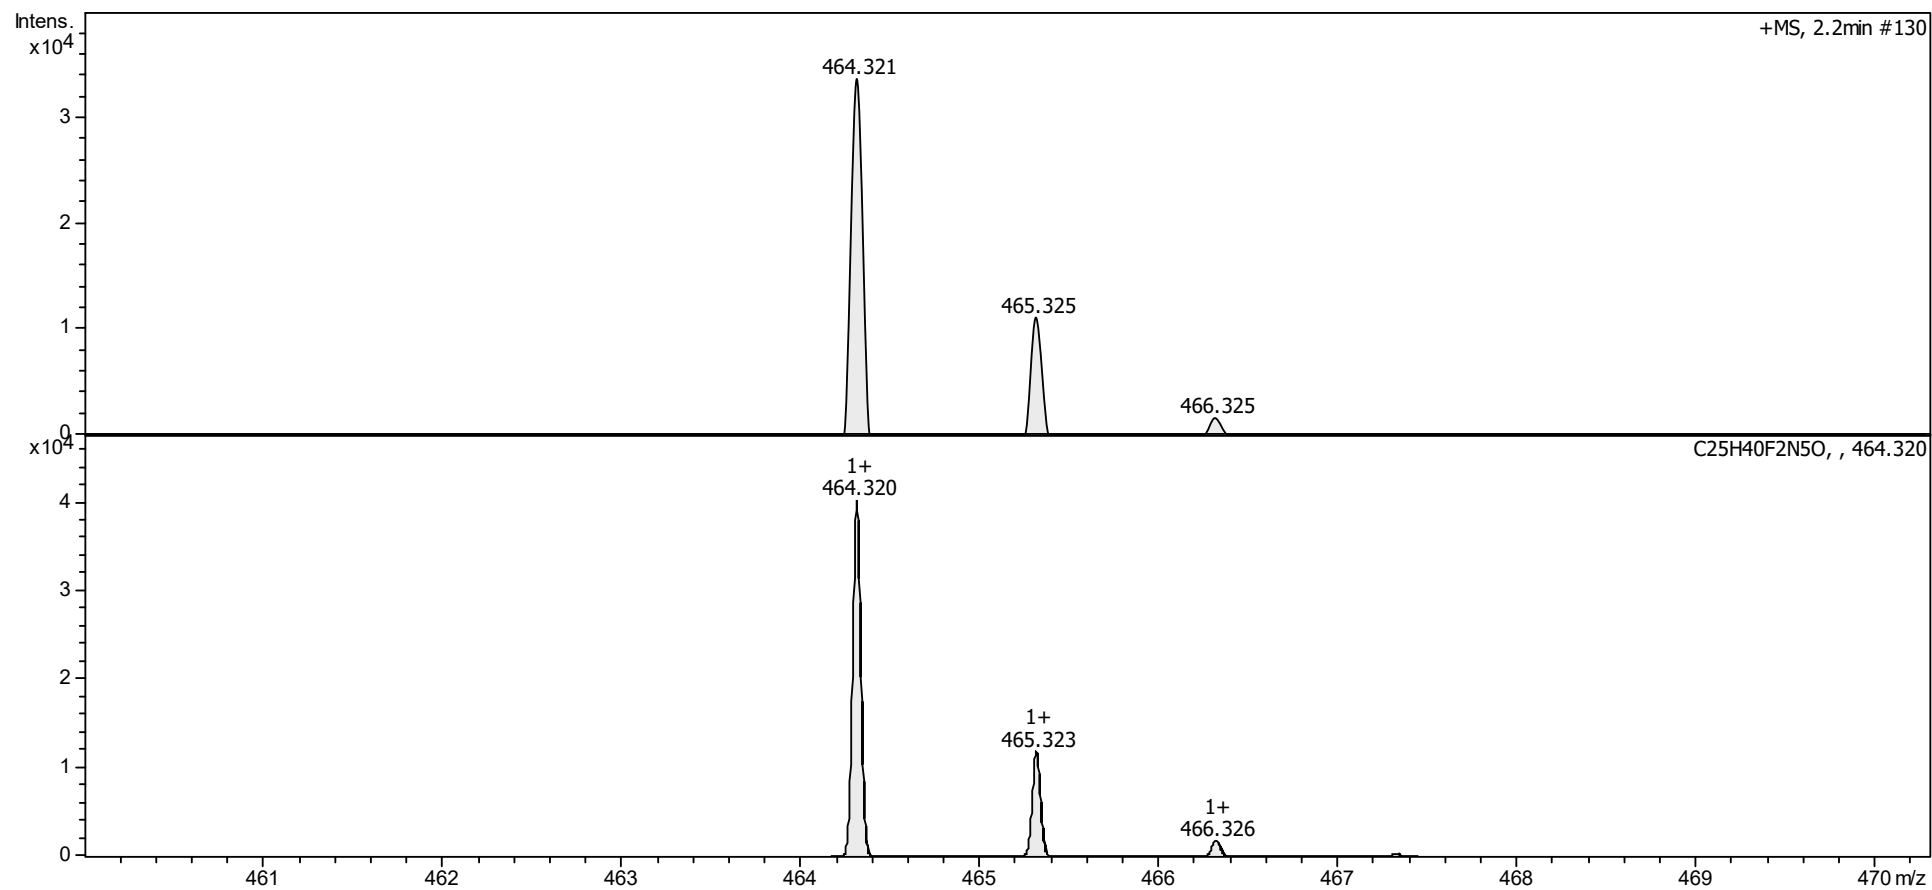

**Figure S31.** HRMS of the compound **10g** with simulation  $C_{25}H_{40}N_5OF_2^+$ .



## 2. Cytotoxicity results

**Table S1.** Mean standard deviation (S.D.) % viability of murine fibroblasts at 24 and 48 h treated with **10a** and **10h**

| Compound<br>conc. (ug/ml) | <b>10a</b> |           |          |           | <b>10h</b> |           |          |          |
|---------------------------|------------|-----------|----------|-----------|------------|-----------|----------|----------|
|                           | 24 h       |           | 48 h     |           | 24 h       |           | 48 h     |          |
|                           | Mean       | S.D.      | Mean     | S.D.      | Mean       | S.D.      | Mean     | S.D.     |
| 0.000128                  | 99.03802   | 5.617851  | 164.1302 | 43.49461* | 82.776     | 8.620915* | 126.521  | 25.96578 |
| 0.00064                   | 92.4874    | 4.288911  | 151.174  | 36.77111* | 83.3257    | 9.59642*  | 98.26907 | 9.298079 |
| 0.0032                    | 93.06764   | 7.575664  | 130.9426 | 24.79858* | 88.6853    | 9.287817* | 104.8672 | 10.71842 |
| 0.016                     | 88.16613   | 5.582378* | 163.5904 | 21.23595* | 88.28829   | 7.291397* | 109.88   | 10.43458 |
| 0.08                      | 78.80592   | 5.553963* | 143.479  | 30.51944* | 84.30295   | 4.658406* | 100.377  | 11.61315 |
| 0.4                       | 80.60773   | 10.44168* | 164.7558 | 26.99878* | 82.45534   | 4.530368* | 110.9254 | 6.091775 |
| 2                         | 76.83616   | 7.012305* | 166.8038 | 22.76988* | 84.18079   | 4.41302*  | 116.2468 | 14.70779 |

\*  $p \leq 0.005$

**Table S2.** Mean  $\pm$  standard deviation (S.D.) % viability of murine fibroblasts at 24 and 48 h treated with **10d** and **10e**

| Compound<br>conc. (ug/ml) | <b>10d</b> |           |          |         | <b>10e</b> |          |          |         |
|---------------------------|------------|-----------|----------|---------|------------|----------|----------|---------|
|                           | 24 h       |           | 48 h     |         | 24 h       |          | 48 h     |         |
|                           | Mean       | S.D.      | Mean     | S.D.    | Mean       | S.D.     | Mean     | S.D.    |
| 0.015625                  | 94.3118    | 14.90656  | 126.4248 | 16.4335 | 98.52528   | 7.367534 | 94.27441 | 13.3297 |
| 0.03125                   | 96.3764    | 11.01797  | 121.438  | 6.8391  | 96.8118    | 11.09797 | 92.3219  | 13.5363 |
| 0.0625                    | 95.47753   | 10.41641  | 110.3562 | 18.7046 | 103.736    | 12.41573 | 132.2691 | 18.3723 |
| 0.125                     | 98.84831   | 13.95933  | 99.68997 | 21.9126 | 92.72472   | 6.418196 | 99.41293 | 13.6618 |
| 0.25                      | 87.45787   | 9.808199  | 103.5752 | 18.3340 | 92.72472   | 8.113975 | 107.223  | 8.1963  |
| 0.5                       | 82.40169   | 18.20816  | 102.0778 | 11.4795 | 96.15169   | 11.07017 | 113.1332 | 16.3888 |
| 1                         | 93.10393   | 6.406198  | 99.62401 | 19.2648 | 92.42978   | 4.663796 | 109.8681 | 9.1816  |
| 2                         | 76.1236    | 6.318664* | 91.34565 | 10.6533 | 94.48034   | 13.10169 | 106.9987 | 5.7246  |

\*  $p \leq 0.005$

**Table S3.** Mean  $\pm$  standard deviation (S.D.) viability % of murine fibroblasts at 24 and 48 h treated with **10f** and **10g**

| Compound<br>conc. (ug/ml) | <b>10f</b> |          |          |         | <b>10g</b> |           |          |          |
|---------------------------|------------|----------|----------|---------|------------|-----------|----------|----------|
|                           | 24 h       |          | 48 h     |         | 24 h       |           | 48 h     |          |
|                           | Mean       | S.D.     | Mean     | S.D.    | Mean       | S.D.      | Mean     | S.D.     |
| 0.015625                  | 110.3933   | 16.27437 | 109.69   | 15.8401 | 97.72472   | 10.74494  | 105.6135 | 10.3570  |
| 0.03125                   | 95.78652   | 11.90013 | 111.2665 | 17.0486 | 93.69382   | 3.618366  | 104.2216 | 12.6720  |
| 0.0625                    | 104.8455   | 14.14209 | 114.8483 | 17.9036 | 85.35112   | 3.787971  | 109.4723 | 8.7817   |
| 0.125                     | 92.16292   | 8.275098 | 113.7665 | 10.3552 | 85.53371   | 9.571963  | 122.9288 | 19.2565  |
| 0.25                      | 100.4775   | 11.42081 | 107.5594 | 13.5086 | 88.23034   | 10.46116  | 101.7942 | 11.3079  |
| 0.5                       | 112.3174   | 14.28318 | 114.8417 | 15.1429 | 87.82303   | 5.451537  | 89.4723  | 11.3727  |
| 1                         | 90.75843   | 8.251162 | 119.7493 | 11.7707 | 91.74157   | 5.610294  | 88.9314  | 11.8388  |
| 2                         | 90.39326   | 13.65581 | 102.4604 | 9.2628  | 80.23876   | 12.08256* | 70.46834 | 13.9502* |

\*  $p \leq 0.005$

### 3. Molecular modeling

**Table S4.** Physicochemical parameters calculated for **10a-h** by SwissADME

| Comp.      | MW     | Fraction Csp3 | #Rotatable bonds | #H-bond acceptors | #H-bond donors | MR     | TPSA  | XLOGP3 |
|------------|--------|---------------|------------------|-------------------|----------------|--------|-------|--------|
| <b>10a</b> | 455.54 | 0.44          | 8                | 7                 | 1              | 130.96 | 57.42 | 3.27   |
| <b>10b</b> | 457.56 | 0.52          | 8                | 7                 | 1              | 132.09 | 57.42 | 3.22   |
| <b>10c</b> | 457.56 | 0.6           | 7                | 7                 | 1              | 130.19 | 57.42 | 2.71   |
| <b>10d</b> | 471.59 | 0.62          | 8                | 7                 | 1              | 135    | 57.42 | 3.17   |
| <b>10e</b> | 459.58 | 0.52          | 10               | 7                 | 1              | 134.2  | 57.42 | 4.01   |
| <b>10f</b> | 461.59 | 0.6           | 11               | 7                 | 1              | 134.68 | 57.42 | 4.31   |
| <b>10g</b> | 463.61 | 0.68          | 12               | 7                 | 1              | 135.15 | 57.42 | 4.76   |
| <b>10h</b> | 413.46 | 0.36          | 7                | 7                 | 1              | 116.38 | 57.42 | 1.98   |

**Table S5.** Solubility, GI absorption, BBB penetration, Pgp substrate, and CYP inhibitory parameters of **10a-h** calculated by SwissADME

| Comp.      | ESOL Class         | GI absorption | BBB permeant | Pgp substrate | CYP1A2 inhibitor | CYP2C19 inhibitor | CYP2C9 inhibitor | CYP2D6 inhibitor | CYP3A4 inhibitor |
|------------|--------------------|---------------|--------------|---------------|------------------|-------------------|------------------|------------------|------------------|
| <b>10a</b> | Moderately soluble | High          | Yes          | Yes           | No               | No                | No               | Yes              | Yes              |
| <b>10b</b> | Moderately soluble | High          | Yes          | Yes           | No               | No                | No               | Yes              | Yes              |
| <b>10c</b> | Moderately soluble | High          | Yes          | Yes           | No               | No                | No               | Yes              | Yes              |
| <b>10d</b> | Moderately soluble | High          | Yes          | Yes           | No               | No                | No               | Yes              | Yes              |
| <b>10e</b> | Moderately soluble | High          | Yes          | No            | No               | No                | No               | Yes              | Yes              |
| <b>10f</b> | Moderately soluble | High          | Yes          | No            | No               | No                | No               | Yes              | Yes              |
| <b>10g</b> | Moderately soluble | High          | Yes          | No            | No               | No                | No               | Yes              | Yes              |
| <b>10h</b> | Soluble            | High          | Yes          | Yes           | No               | No                | No               | Yes              | Yes              |

**Table S6.** Skin permeation, druglikeness, bioavailability, and PAINS parameters of **10a-h** calculated by SwissADME

| Comp.      | log Kp (cm/s) | Lipinski #violations | Ghose #violations | Veber #violations | Egan #violations | Muegge #violations | Bioavailability Score | PAINS #alerts | Brenk #alerts |
|------------|---------------|----------------------|-------------------|-------------------|------------------|--------------------|-----------------------|---------------|---------------|
| <b>10a</b> | -6.76         | 0                    | 1                 | 0                 | 0                | 0                  | 0.55                  | 0             | 0             |
| <b>10b</b> | -6.8          | 0                    | 1                 | 0                 | 0                | 0                  | 0.55                  | 0             | 1             |
| <b>10c</b> | -7.17         | 0                    | 1                 | 0                 | 0                | 0                  | 0.55                  | 0             | 1             |
| <b>10d</b> | -6.93         | 0                    | 1                 | 0                 | 0                | 0                  | 0.55                  | 0             | 1             |
| <b>10e</b> | -6.26         | 0                    | 1                 | 0                 | 0                | 0                  | 0.55                  | 0             | 1             |
| <b>10f</b> | -6.06         | 0                    | 1                 | 1                 | 0                | 0                  | 0.55                  | 0             | 1             |
| <b>10g</b> | -5.75         | 0                    | 2                 | 1                 | 0                | 0                  | 0.55                  | 0             | 0             |
| <b>10h</b> | -7.42         | 0                    | 0                 | 0                 | 0                | 0                  | 0.55                  | 0             | 0             |
